# Supplementary material for: Screening of healthcare workers for tuberculosis: development and validation of a new health economic model to inform practice
Source: PubMed Central journal article supplement — BMJ Open. 2012 Mar 1;2(2):e000630. doi: 10.1136/bmjopen-2011-000630 (PMC3293131; doi:10.1136/bmjopen-2011-000630), 2012-03-01
Supplement: bmjopen-2011-000630-s1.pdf [file bmjopen-2011-000630-s1.pdf]

**Screening of Health Care Workers for Tuberculosis: Development and Validation of a New Health Economic Model to Inform Practice**

Merve Nazli Eralp<sup>1</sup>, Stefan Scholtes<sup>1</sup>, Geraldine Martell<sup>2</sup>, Robert Winter<sup>3</sup>, Andrew Robert Exley<sup>4</sup>

**Reporting Checklist after Drummond and Jefferson, BMJ Economic Evaluation Working Party, BMJ 1996; 313 : 275 :**

STUDY DESIGN

- |                                                  |     |
|--------------------------------------------------|-----|
| (1) Research question                            | Yes |
| (2) Economic importance of the research question | Yes |
| (3) Viewpoint of the analysis                    | Yes |
| (4) Rationale for choosing the alternatives      | Yes |
| (5) The alternatives being compared              | Yes |
| (6) The form of economic evaluation              | Yes |
| (7) Justification of economic evaluation used    | Yes |

Data Collection

- |                                                                                                                                                |                          |
|------------------------------------------------------------------------------------------------------------------------------------------------|--------------------------|
| (8) The sources of effectiveness estimates used                                                                                                | Yes                      |
| (9) Details of the design and results of effectiveness study                                                                                   | Yes                      |
| (10) Details of the method of synthesis or meta-analysis of estimates are given (if based on an overview of a number of effectiveness studies) | Yes<br><i>referenced</i> |
| (11) The primary outcome measure(s) for the economic evaluation are clearly stated                                                             | Yes                      |
| (12) Methods to value health states and other benefits are stated                                                                              | Yes                      |
| (13) Details of the subjects from whom valuations were obtained are given                                                                      | <i>referenced</i>        |
| (14) Productivity changes (if included) are reported separately                                                                                | <i>not applicable</i>    |
| (15) The relevance of productivity changes to the study question is discussed                                                                  | <i>see discussion</i>    |
| (16) Quantities of resources are reported separately from their unit costs                                                                     | Yes                      |
| (17) Methods for the estimation of quantities and unit costs are described                                                                     | Yes                      |
| (18) Currency and price data are recorded                                                                                                      | Yes                      |
| (19) Details of currency of price adjustments for inflation or currency conversion are given                                                   | No                       |
| (20) Details of any model used are given                                                                                                       | Yes                      |
| (21) The choice of model used and the key parameters on which it is based are justified                                                        | Yes                      |
| (21) The choice of model used and the key parameters on which it is based are justified                                                        | Yes                      |
| (22) Time horizon of costs and benefits is stated                                                                                              | Yes                      |
| (23) The discount rate(s) is stated                                                                                                            | Yes                      |
| (24) The choice of rate(s) is justified                                                                                                        | <i>standard rate</i>     |
| (25) An explanation is given if costs or benefits are not discounted                                                                           | <i>not applicable</i>    |
| (26) Details of statistical tests and confidence intervals are given for stochastic data                                                       | <i>ranges cited</i>      |
| (27) The approach to sensitivity analysis is given                                                                                             | Yes                      |
| (28) The choice of variables for sensitivity analysis is justified                                                                             | Yes                      |
| (29) The ranges over which the variables are varied are stated                                                                                 | Yes                      |
| (30) Relevant alternatives are compared                                                                                                        | Yes                      |
| (31) Incremental analysis is reported                                                                                                          | Yes                      |
| (32) Major outcomes are presented in a disaggregated as well as aggregated form                                                                | Yes                      |
| (33) The answer to the study question is given                                                                                                 | Yes                      |
| (34) Conclusions follow from the data reported                                                                                                 | Yes                      |
| (35) Conclusions are accompanied by the appropriate caveats                                                                                    | Yes                      |

Andrew Exley, on behalf of the authors
