# Supplementary material for: Screening of healthcare workers for tuberculosis: development and validation of a new health economic model to inform practice
Source: PubMed Central journal article supplement — BMJ Open. 2012 Mar 1;2(2):e000630. doi: 10.1136/bmjopen-2011-000630 (PMC3293131; doi:10.1136/bmjopen-2011-000630), 2012-03-01
Supplement: bmjopen-2011-000630-s2.pdf [file bmjopen-2011-000630-s2.pdf]

**Suppl.Table 2 Sensitivity Analysis**

Incremental  
Cost-  
Effectiveness  
Ratio (ICER)

| <b>2a</b>   |          | Incremental |        | Incremental   |               | Cost / Eff | ICER    |
|-------------|----------|-------------|--------|---------------|---------------|------------|---------|
| <b>IGRA</b> | Strategy | Cost        | Cost   | Effectiveness | Effectiveness |            |         |
| 0.9         | IGRA+TST | £81.59      | £0.00  | 19.07438      | 0             | 4.27738    | £0      |
| 0.91        | IGRA+TST | £80.95      | £0.00  | 19.07455      | 0             | 4.24394    | £0      |
| 0.92        | IGRA+TST | £80.32      | £0.00  | 19.07471      | 0             | 4.21058    | £0      |
| 0.93        | IGRA+TST | £79.68      | £0.00  | 19.07487      | 0             | 4.17734    | £0      |
| 0.94        | IGRA+TST | £79.05      | £0.00  | 19.07504      | 0             | 4.14427    | £0      |
| 0.95        | IGRA+TST | £78.43      | £0.00  | 19.0752       | 0             | 4.11142    | £0      |
| 0.96        | IGRA+TST | £77.81      | £0.00  | 19.07536      | 0             | 4.07888    | £0      |
| 0.97        | IGRA+TST | £77.19      | £0.00  | 19.07553      | 0             | 4.04679    | £0      |
| 0.98        | IGRA+TST | £76.60      | £0.00  | 19.07569      | 0             | 4.01539    | £0      |
| 0.99        | IGRA+TST | £76.02      | £0.00  | 19.07585      | 0             | 3.9851     | £0      |
| 0.9         | IGRA     | £165.39     | £83.81 | 19.07583      | 0.00144       | 8.67038    | £58,089 |
| 0.91        | IGRA     | £157.13     | £76.17 | 19.07599      | 0.00145       | 8.23685    | £52,664 |
| 0.92        | IGRA     | £148.86     | £68.55 | 19.07616      | 0.00145       | 7.80356    | £47,281 |
| 0.93        | IGRA     | £140.60     | £60.92 | 19.07633      | 0.00145       | 7.3706     | £41,939 |
| 0.94        | IGRA     | £132.35     | £53.30 | 19.07649      | 0.00145       | 6.93805    | £36,634 |
| 0.95        | IGRA     | £124.11     | £45.69 | 19.07666      | 0.00146       | 6.50607    | £31,365 |
| 0.96        | IGRA     | £115.89     | £38.08 | 19.07682      | 0.00146       | 6.07488    | £26,131 |
| 0.97        | IGRA     | £107.69     | £30.49 | 19.07698      | 0.00146       | 5.64485    | £20,929 |
| 0.98        | IGRA     | £99.52      | £22.92 | 19.07714      | 0.00145       | 5.2166     | £15,757 |
| 0.99        | IGRA     | £91.41      | £15.39 | 19.0773       | 0.00145       | 4.79137    | £10,614 |
| <b>2b</b>   |          | Incremental |        | Incremental   |               | Cost / Eff | ICER    |
| <b>IGRA</b> | Strategy | Cost        | Cost   | Effectiveness | Effectiveness |            |         |
| 0.82        | IGRA+TST | £74.34      | £0.00  | 19.07568      | 0             | 3.89697    | £0      |
| 0.84        | IGRA+TST | £74.84      | £0.00  | 19.07568      | 0             | 3.92327    | £0      |
| 0.86        | IGRA+TST | £75.34      | £0.00  | 19.07568      | 0             | 3.94958    | £0      |
| 0.87        | IGRA+TST | £75.84      | £0.00  | 19.07569      | 0             | 3.97589    | £0      |
| 0.89        | IGRA+TST | £76.35      | £0.00  | 19.07569      | 0             | 4.00222    | £0      |
| 0.91        | IGRA+TST | £76.85      | £0.00  | 19.07569      | 0             | 4.02856    | £0      |
| 0.93        | IGRA+TST | £77.35      | £0.00  | 19.07569      | 0             | 4.05492    | £0      |
| 0.94        | IGRA+TST | £77.85      | £0.00  | 19.07569      | 0             | 4.08128    | £0      |
| 0.96        | IGRA+TST | £78.36      | £0.00  | 19.07569      | 0             | 4.10766    | £0      |
| 0.98        | IGRA+TST | £78.86      | £0.00  | 19.07569      | 0             | 4.13405    | £0      |
| 0.82        | IGRA     | £98.19      | £23.86 | 19.07679      | 0.0011        | 5.14723    | £21,589 |
| 0.84        | IGRA     | £98.49      | £23.65 | 19.07687      | 0.00118       | 5.16266    | £19,999 |
| 0.86        | IGRA     | £98.78      | £23.44 | 19.07694      | 0.00126       | 5.17808    | £18,602 |
| 0.87        | IGRA     | £99.08      | £23.23 | 19.07702      | 0.00134       | 5.1935     | £17,366 |
| 0.89        | IGRA     | £99.37      | £23.03 | 19.0771       | 0.00142       | 5.2089     | £16,264 |
| 0.91        | IGRA     | £99.66      | £22.82 | 19.07718      | 0.00149       | 5.2243     | £15,276 |
| 0.93        | IGRA     | £99.96      | £22.61 | 19.07726      | 0.00157       | 5.23969    | £14,384 |
| 0.94        | IGRA     | £100.25     | £22.40 | 19.07734      | 0.00165       | 5.25508    | £13,576 |
| 0.96        | IGRA     | £100.55     | £22.19 | 19.07742      | 0.00173       | 5.27046    | £12,840 |
| 0.98        | IGRA     | £100.84     | £21.98 | 19.07749      | 0.00181       | 5.28583    | £12,166 |

**Suppl.Table 3**  
**3a**

| Deaths,<br>All causes | Strategy | Incremental |        | Incremental   |               | Cost / Eff | ICER    |
|-----------------------|----------|-------------|--------|---------------|---------------|------------|---------|
|                       |          | Cost        | Cost   | Effectiveness | Effectiveness |            |         |
| 0.0045                | IGRA+TST | £76.60      | £0.00  | 19.07569      | 0             | 4.01539    | £0      |
| 0.009                 | IGRA+TST | £76.17      | £0.00  | 18.20799      | 0             | 4.18356    | £0      |
| 0.0135                | IGRA+TST | £75.77      | £0.00  | 17.38801      | 0             | 4.3577     | £0      |
| 0.018                 | IGRA+TST | £75.39      | £0.00  | 16.61293      | 0             | 4.5379     | £0      |
| 0.0225                | IGRA+TST | £75.02      | £0.00  | 15.88011      | 0             | 4.72424    | £0      |
| 0.027                 | IGRA+TST | £74.67      | £0.00  | 15.18706      | 0             | 4.9168     | £0      |
| 0.0315                | IGRA+TST | £74.34      | £0.00  | 14.53146      | 0             | 5.11565    | £0      |
| 0.036                 | IGRA+TST | £74.02      | £0.00  | 13.91111      | 0             | 5.32085    | £0      |
| 0.0405                | IGRA+TST | £73.71      | £0.00  | 13.32393      | 0             | 5.53247    | £0      |
| 0.045                 | IGRA+TST | £73.42      | £0.00  | 12.768        | 0             | 5.75055    | £0      |
| 0.0045                | IGRA     | £99.52      | £22.92 | 19.07714      | 0.00145       | 5.2166     | £15,757 |
| 0.009                 | IGRA     | £99.23      | £23.05 | 18.20939      | 0.00139       | 5.44929    | £16,544 |
| 0.0135                | IGRA     | £98.95      | £23.18 | 17.38935      | 0.00134       | 5.69038    | £17,357 |
| 0.018                 | IGRA     | £98.69      | £23.30 | 16.61421      | 0.00128       | 5.93999    | £18,197 |
| 0.0225                | IGRA     | £98.44      | £23.42 | 15.88134      | 0.00123       | 6.19826    | £19,063 |
| 0.027                 | IGRA     | £98.20      | £23.52 | 15.18824      | 0.00118       | 6.46529    | £19,955 |
| 0.0315                | IGRA     | £97.97      | £23.63 | 14.53259      | 0.00113       | 6.74119    | £20,874 |
| 0.036                 | IGRA     | £97.75      | £23.73 | 13.91219      | 0.00109       | 7.02605    | £21,820 |
| 0.0405                | IGRA     | £97.54      | £23.82 | 13.32498      | 0.00105       | 7.31996    | £22,792 |
| 0.045                 | IGRA     | £97.34      | £23.92 | 12.769        | 0.00101       | 7.623      | £23,791 |

| TB Deaths | Strategy | Incremental |        | Incremental   |               | Cost / Eff | ICER    |
|-----------|----------|-------------|--------|---------------|---------------|------------|---------|
|           |          | Cost        | Cost   | Effectiveness | Effectiveness |            |         |
| 0.018     | IGRA+TST | £76.60      | £0.00  | 19.07569      | 0             | 4.01539    | £0      |
| 0.036     | IGRA+TST | £76.58      | £0.00  | 19.07496      | 0             | 4.01486    | £0      |
| 0.054     | IGRA+TST | £76.57      | £0.00  | 19.07423      | 0             | 4.01433    | £0      |
| 0.072     | IGRA+TST | £76.56      | £0.00  | 19.07351      | 0             | 4.01381    | £0      |
| 0.09      | IGRA+TST | £76.54      | £0.00  | 19.07278      | 0             | 4.01328    | £0      |
| 0.108     | IGRA+TST | £76.53      | £0.00  | 19.07206      | 0             | 4.01275    | £0      |
| 0.126     | IGRA+TST | £76.52      | £0.00  | 19.07134      | 0             | 4.01223    | £0      |
| 0.144     | IGRA+TST | £76.51      | £0.00  | 19.07062      | 0             | 4.0117     | £0      |
| 0.162     | IGRA+TST | £76.49      | £0.00  | 19.0699       | 0             | 4.01118    | £0      |
| 0.18      | IGRA+TST | £76.48      | £0.00  | 19.06918      | 0             | 4.01066    | £0      |
| 0.018     | IGRA     | £99.52      | £22.92 | 19.07714      | 0.00145       | 5.2166     | £15,757 |
| 0.036     | IGRA     | £99.51      | £22.92 | 19.0766       | 0.00164       | 5.21625    | £13,995 |
| 0.054     | IGRA     | £99.50      | £22.93 | 19.07605      | 0.00182       | 5.21589    | £12,591 |
| 0.072     | IGRA     | £99.49      | £22.93 | 19.07551      | 0.002         | 5.21554    | £11,444 |
| 0.09      | IGRA     | £99.48      | £22.94 | 19.07497      | 0.00219       | 5.21519    | £10,491 |
| 0.108     | IGRA     | £99.47      | £22.94 | 19.07443      | 0.00237       | 5.21483    | £9,686  |
| 0.126     | IGRA     | £99.46      | £22.94 | 19.07389      | 0.00255       | 5.21448    | £8,997  |
| 0.144     | IGRA     | £99.45      | £22.95 | 19.07335      | 0.00273       | 5.21413    | £8,401  |
| 0.162     | IGRA     | £99.44      | £22.95 | 19.07281      | 0.00291       | 5.21378    | £7,880  |
| 0.18      | IGRA     | £99.43      | £22.95 | 19.07227      | 0.00309       | 5.21343    | £7,420  |

**3c**

| Prevalence<br>LTBI | Strategy | Incremental |        | Incremental   |               | Cost / Eff | ICER    |
|--------------------|----------|-------------|--------|---------------|---------------|------------|---------|
|                    |          | Cost        | Cost   | Effectiveness | Effectiveness |            |         |
| 0.035              | IGRA+TST | £76.60      | £0.00  | 19.07569      | 0             | 4.01539    | £0      |
| 0.07               | IGRA+TST | £116.83     | £0.00  | 19.07038      | 0             | 6.12618    | £0      |
| 0.105              | IGRA+TST | £156.98     | £0.00  | 19.06508      | 0             | 8.234      | £0      |
| 0.14               | IGRA+TST | £197.08     | £0.00  | 19.0598       | 0             | 10.34018   | £0      |
| 0.175              | IGRA+TST | £237.13     | £0.00  | 19.05454      | 0             | 12.44492   | £0      |
| 0.21               | IGRA+TST | £277.13     | £2.03  | 19.0493       | -0.00873      | 14.54813   | -£233   |
| 0.245              | IGRA+TST | £317.08     | £6.91  | 19.04407      | -0.01014      | 16.64955   | -£682   |
| 0.28               | IGRA+TST | £356.96     | £11.74 | 19.03887      | -0.01152      | 18.74887   | -£1,019 |
| 0.315              | IGRA+TST | £396.77     | £16.49 | 19.0337       | -0.01288      | 20.84569   | -£1,281 |
| 0.35               | IGRA+TST | £436.51     | £21.17 | 19.02855      | -0.01421      | 22.9395    | -£1,490 |
| 0.035              | IGRA     | £99.52      | £22.92 | 19.07714      | 0.00145       | 5.2166     | £15,757 |
| 0.07               | IGRA     | £134.75     | £17.92 | 19.07331      | 0.00293       | 7.06496    | £6,111  |
| 0.105              | IGRA     | £169.88     | £12.89 | 19.06949      | 0.0044        | 8.9083     | £2,928  |
| 0.14               | IGRA     | £204.96     | £7.88  | 19.06567      | 0.00586       | 10.75046   | £1,345  |
| 0.175              | IGRA     | £240.04     | £2.90  | 19.06185      | 0.00731       | 12.59253   | £398    |
| 0.21               | IGRA     | £275.10     | £0.00  | 19.05803      | 0             | 14.43492   | £0      |
| 0.245              | IGRA     | £310.16     | £0.00  | 19.05421      | 0             | 16.27784   | £0      |
| 0.28               | IGRA     | £345.22     | £0.00  | 19.05039      | 0             | 18.1214    | £0      |
| 0.315              | IGRA     | £380.28     | £0.00  | 19.04658      | 0             | 19.96564   | £0      |
| 0.35               | IGRA     | £415.33     | £0.00  | 19.04276      | 0             | 21.8106    | £0      |

**3d**

| Prevalence<br>TB | Strategy | Incremental |        | Incremental   |               | Cost / Eff | ICER    |
|------------------|----------|-------------|--------|---------------|---------------|------------|---------|
|                  |          | Cost        | Cost   | Effectiveness | Effectiveness |            |         |
| 1.00E-04         | IGRA+TST | £76.60      | £0.00  | 19.07569      | 0             | 4.01539    | £0      |
| 2.00E-04         | IGRA+TST | £77.10      | £0.00  | 19.07565      | 0             | 4.04193    | £0      |
| 3.00E-04         | IGRA+TST | £77.61      | £0.00  | 19.07561      | 0             | 4.06839    | £0      |
| 4.00E-04         | IGRA+TST | £78.11      | £0.00  | 19.07557      | 0             | 4.09478    | £0      |
| 5.00E-04         | IGRA+TST | £78.61      | £0.00  | 19.07553      | 0             | 4.1211     | £0      |
| 6.00E-04         | IGRA+TST | £79.11      | £0.00  | 19.07549      | 0             | 4.14735    | £0      |
| 7.00E-04         | IGRA+TST | £79.61      | £0.00  | 19.07545      | 0             | 4.17353    | £0      |
| 8.00E-04         | IGRA+TST | £80.11      | £0.00  | 19.07541      | 0             | 4.19964    | £0      |
| 9.00E-04         | IGRA+TST | £80.61      | £0.00  | 19.07537      | 0             | 4.22568    | £0      |
| 0.001            | IGRA+TST | £81.10      | £0.00  | 19.07533      | 0             | 4.25165    | £0      |
| 1.00E-04         | IGRA     | £99.52      | £22.92 | 19.07714      | 0.00145       | 5.2166     | £15,757 |
| 2.00E-04         | IGRA     | £100.45     | £23.35 | 19.07706      | 0.00141       | 5.26539    | £16,529 |
| 3.00E-04         | IGRA     | £101.38     | £23.77 | 19.07698      | 0.00137       | 5.31406    | £17,347 |
| 4.00E-04         | IGRA     | £102.30     | £24.19 | 19.07689      | 0.00133       | 5.36263    | £18,216 |
| 5.00E-04         | IGRA     | £103.23     | £24.61 | 19.07681      | 0.00129       | 5.4111     | £19,139 |
| 6.00E-04         | IGRA     | £104.15     | £25.04 | 19.07673      | 0.00124       | 5.45945    | £20,123 |
| 7.00E-04         | IGRA     | £105.07     | £25.46 | 19.07665      | 0.0012        | 5.5077     | £21,174 |
| 8.00E-04         | IGRA     | £105.99     | £25.88 | 19.07657      | 0.00116       | 5.55585    | £22,299 |
| 9.00E-04         | IGRA     | £106.90     | £26.30 | 19.07649      | 0.00112       | 5.6039     | £23,505 |
| 0.001            | IGRA     | £107.82     | £26.72 | 19.07641      | 0.00108       | 5.65184    | £24,802 |

Health Economic Models Inform Screening for Tuberculosis

| <b>3e</b>    |          | Incremental |        | Incremental   |               | Cost / Eff | ICER    |
|--------------|----------|-------------|--------|---------------|---------------|------------|---------|
| Relapse Rate | Strategy | Cost        | Cost   | Effectiveness | Effectiveness |            |         |
| 0.0315       | IGRA+TST | £76.60      | £0.00  | 19.07569      | 0             | 4.01539    | £0      |
| 0.063        | IGRA+TST | £77.72      | £0.00  | 19.07525      | 0             | 4.07427    | £0      |
| 0.0945       | IGRA+TST | £78.96      | £0.00  | 19.07476      | 0             | 4.13933    | £0      |
| 0.126        | IGRA+TST | £80.33      | £0.00  | 19.07422      | 0             | 4.21123    | £0      |
| 0.1575       | IGRA+TST | £81.84      | £0.00  | 19.07361      | 0             | 4.29067    | £0      |
| 0.189        | IGRA+TST | £83.51      | £0.00  | 19.07294      | 0             | 4.37835    | £0      |
| 0.2205       | IGRA+TST | £85.35      | £0.00  | 19.07219      | 0             | 4.475      | £0      |
| 0.252        | IGRA+TST | £87.37      | £0.00  | 19.07136      | 0             | 4.58127    | £0      |
| 0.2835       | IGRA+TST | £89.59      | £0.00  | 19.07045      | 0             | 4.69774    | £0      |
| 0.315        | IGRA+TST | £92.01      | £0.00  | 19.06944      | 0             | 4.82489    | £0      |
| 0.0315       | IGRA     | £99.52      | £22.92 | 19.07714      | 0.00145       | 5.2166     | £15,757 |
| 0.063        | IGRA     | £100.35     | £22.63 | 19.07682      | 0.00158       | 5.2601     | £14,365 |
| 0.0945       | IGRA     | £101.26     | £22.31 | 19.07647      | 0.00171       | 5.30821    | £13,052 |
| 0.126        | IGRA     | £102.28     | £21.95 | 19.07607      | 0.00186       | 5.36143    | £11,819 |
| 0.1575       | IGRA     | £103.40     | £21.56 | 19.07563      | 0.00202       | 5.4203     | £10,664 |
| 0.189        | IGRA     | £104.63     | £21.13 | 19.07514      | 0.0022        | 5.48537    | £9,587  |
| 0.2205       | IGRA     | £106.00     | £20.65 | 19.07459      | 0.0024        | 5.5572     | £8,589  |
| 0.252        | IGRA     | £107.51     | £20.14 | 19.07399      | 0.00263       | 5.63633    | £7,668  |
| 0.2835       | IGRA     | £109.16     | £19.57 | 19.07332      | 0.00287       | 5.72324    | £6,823  |
| 0.315        | IGRA     | £110.97     | £18.96 | 19.07258      | 0.00313       | 5.81832    | £6,051  |

| <b>3f</b>      |          | Incremental |        | Incremental   |               | Cost / Eff | ICER    |
|----------------|----------|-------------|--------|---------------|---------------|------------|---------|
| Hepatitis rate | Strategy | Cost        | Cost   | Effectiveness | Effectiveness |            |         |
| 0.0177         | IGRA+TST | £76.60      | £0.00  | 19.07569      | 0             | 4.01539    | £0      |
| 0.0354         | IGRA+TST | £77.23      | £0.00  | 19.07476      | 0             | 4.04875    | £0      |
| 0.0531         | IGRA+TST | £77.86      | £0.00  | 19.07383      | 0             | 4.08211    | £0      |
| 0.0708         | IGRA+TST | £78.49      | £0.00  | 19.0729       | 0             | 4.11548    | £0      |
| 0.0885         | IGRA+TST | £79.13      | £0.00  | 19.07197      | 0             | 4.14884    | £0      |
| 0.1062         | IGRA+TST | £79.76      | £0.00  | 19.07105      | 0             | 4.18221    | £0      |
| 0.1239         | IGRA+TST | £80.39      | £0.00  | 19.07012      | 0             | 4.21559    | £0      |
| 0.1416         | IGRA+TST | £81.02      | £0.00  | 19.06919      | 0             | 4.24896    | £0      |
| 0.1593         | IGRA+TST | £81.66      | £0.00  | 19.06826      | 0             | 4.28234    | £0      |
| 0.177          | IGRA+TST | £82.29      | £0.00  | 19.06733      | 0             | 4.31573    | £0      |
| 0.0177         | IGRA     | £99.52      | £22.92 | 19.07714      | 0.00145       | 5.2166     | £15,757 |
| 0.0354         | IGRA     | £100.15     | £22.92 | 19.07622      | 0.00146       | 5.24994    | £15,733 |
| 0.0531         | IGRA     | £100.78     | £22.92 | 19.07529      | 0.00146       | 5.28328    | £15,709 |
| 0.0708         | IGRA     | £101.41     | £22.92 | 19.07436      | 0.00146       | 5.31663    | £15,685 |
| 0.0885         | IGRA     | £102.04     | £22.92 | 19.07344      | 0.00146       | 5.34997    | £15,662 |
| 0.1062         | IGRA     | £102.67     | £22.91 | 19.07251      | 0.00147       | 5.38332    | £15,638 |
| 0.1239         | IGRA     | £103.30     | £22.91 | 19.07159      | 0.00147       | 5.41668    | £15,615 |
| 0.1416         | IGRA     | £103.94     | £22.91 | 19.07066      | 0.00147       | 5.45004    | £15,591 |
| 0.1593         | IGRA     | £104.57     | £22.91 | 19.06973      | 0.00147       | 5.4834     | £15,568 |
| 0.177          | IGRA     | £105.20     | £22.91 | 19.06881      | 0.00147       | 5.51676    | £15,545 |

Health Economic Models Inform Screening for Tuberculosis

| <b>3g</b>          |                 | Incremental |             | Incremental          |                      | Cost / Eff | ICER    |
|--------------------|-----------------|-------------|-------------|----------------------|----------------------|------------|---------|
| <b>Repeat Rate</b> | <b>Strategy</b> | <b>Cost</b> | <b>Cost</b> | <b>Effectiveness</b> | <b>Effectiveness</b> |            |         |
| 0.015              | IGRA+TST        | £75.98      | £0.00       | 19.07569             | 0                    | 3.98287    | £0      |
| 0.03               | IGRA+TST        | £76.46      | £0.00       | 19.07569             | 0                    | 4.00814    | £0      |
| 0.045              | IGRA+TST        | £76.94      | £0.00       | 19.07569             | 0                    | 4.03344    | £0      |
| 0.06               | IGRA+TST        | £77.42      | £0.00       | 19.07569             | 0                    | 4.05875    | £0      |
| 0.075              | IGRA+TST        | £77.91      | £0.00       | 19.07568             | 0                    | 4.08409    | £0      |
| 0.09               | IGRA+TST        | £78.39      | £0.00       | 19.07568             | 0                    | 4.10945    | £0      |
| 0.105              | IGRA+TST        | £78.87      | £0.00       | 19.07568             | 0                    | 4.13484    | £0      |
| 0.12               | IGRA+TST        | £79.36      | £0.00       | 19.07568             | 0                    | 4.16025    | £0      |
| 0.135              | IGRA+TST        | £79.84      | £0.00       | 19.07568             | 0                    | 4.18568    | £0      |
| 0.15               | IGRA+TST        | £80.33      | £0.00       | 19.07568             | 0                    | 4.21115    | £0      |
| 0.015              | IGRA            | £98.64      | £22.66      | 19.07714             | 0.00146              | 5.17048    | £15,573 |
| 0.03               | IGRA            | £99.32      | £22.86      | 19.07714             | 0.00145              | 5.20633    | £15,716 |
| 0.045              | IGRA            | £100.01     | £23.07      | 19.07714             | 0.00145              | 5.24219    | £15,859 |
| 0.06               | IGRA            | £100.69     | £23.27      | 19.07714             | 0.00145              | 5.27807    | £16,002 |
| 0.075              | IGRA            | £101.38     | £23.47      | 19.07714             | 0.00145              | 5.31398    | £16,144 |
| 0.09               | IGRA            | £102.06     | £23.67      | 19.07714             | 0.00145              | 5.34991    | £16,287 |
| 0.105              | IGRA            | £102.75     | £23.87      | 19.07714             | 0.00145              | 5.38586    | £16,430 |
| 0.12               | IGRA            | £103.43     | £24.07      | 19.07713             | 0.00145              | 5.42184    | £16,574 |
| 0.135              | IGRA            | £104.12     | £24.28      | 19.07713             | 0.00145              | 5.45785    | £16,717 |
| 0.15               | IGRA            | £104.81     | £24.48      | 19.07713             | 0.00145              | 5.49388    | £16,860 |

| <b>3h</b>          |                 | Incremental |             | Incremental          |                      | Cost / Eff | ICER    |
|--------------------|-----------------|-------------|-------------|----------------------|----------------------|------------|---------|
| <b>Repeat Rate</b> | <b>Strategy</b> | <b>Cost</b> | <b>Cost</b> | <b>Effectiveness</b> | <b>Effectiveness</b> |            |         |
| 0.025              | IGRA+TST        | £74.95      | £0.00       | 19.07542             | 0                    | 3.92919    | £0      |
| 0.05               | IGRA+TST        | £75.23      | £0.00       | 19.07546             | 0                    | 3.94368    | £0      |
| 0.075              | IGRA+TST        | £75.50      | £0.00       | 19.07551             | 0                    | 3.95817    | £0      |
| 0.1                | IGRA+TST        | £75.78      | £0.00       | 19.07555             | 0                    | 3.97267    | £0      |
| 0.125              | IGRA+TST        | £76.06      | £0.00       | 19.0756              | 0                    | 3.98716    | £0      |
| 0.15               | IGRA+TST        | £76.33      | £0.00       | 19.07564             | 0                    | 4.00165    | £0      |
| 0.175              | IGRA+TST        | £76.61      | £0.00       | 19.07569             | 0                    | 4.01615    | £0      |
| 0.2                | IGRA+TST        | £76.89      | £0.00       | 19.07573             | 0                    | 4.03064    | £0      |
| 0.225              | IGRA+TST        | £77.16      | £0.00       | 19.07578             | 0                    | 4.04513    | £0      |
| 0.25               | IGRA+TST        | £77.44      | £0.00       | 19.07583             | 0                    | 4.05962    | £0      |
| 0.025              | IGRA            | £99.52      | £24.57      | 19.07714             | 0.00172              | 5.2166     | £14,242 |
| 0.05               | IGRA            | £99.52      | £24.29      | 19.07714             | 0.00168              | 5.2166     | £14,462 |
| 0.075              | IGRA            | £99.52      | £24.01      | 19.07714             | 0.00163              | 5.2166     | £14,695 |
| 0.1                | IGRA            | £99.52      | £23.74      | 19.07714             | 0.00159              | 5.2166     | £14,942 |
| 0.125              | IGRA            | £99.52      | £23.46      | 19.07714             | 0.00154              | 5.2166     | £15,202 |
| 0.15               | IGRA            | £99.52      | £23.18      | 19.07714             | 0.0015               | 5.2166     | £15,479 |
| 0.175              | IGRA            | £99.52      | £22.91      | 19.07714             | 0.00145              | 5.2166     | £15,773 |
| 0.2                | IGRA            | £99.52      | £22.63      | 19.07714             | 0.00141              | 5.2166     | £16,085 |
| 0.225              | IGRA            | £99.52      | £22.35      | 19.07714             | 0.00136              | 5.2166     | £16,419 |
| 0.25               | IGRA            | £99.52      | £22.08      | 19.07714             | 0.00132              | 5.2166     | £16,776 |

**Suppl. Table 4**  
**TST, IGRA Costs**  
**TST £24**

| IGRA Cost | Strategy    | Cost    | Incremental |               | Incremental   |            | ICER    |
|-----------|-------------|---------|-------------|---------------|---------------|------------|---------|
|           |             |         | Cost        | Effectiveness | Effectiveness | Cost / Eff |         |
|           | 45 IGRA+TST | £86.07  | £0.00       | 19.07569      | 0             | 4.51183    | £0      |
|           | 55 IGRA+TST | £89.71  | £0.00       | 19.07569      | 0             | 4.70303    | £0      |
|           | 65 IGRA+TST | £93.36  | £0.00       | 19.07569      | 0             | 4.89423    | £0      |
|           | 75 IGRA+TST | £97.01  | £0.00       | 19.07569      | 0             | 5.08543    | £0      |
|           | 85 IGRA+TST | £100.66 | £0.00       | 19.07569      | 0             | 5.27663    | £0      |
|           | 95 IGRA+TST | £104.30 | £0.00       | 19.07569      | 0             | 5.46784    | £0      |
|           | 45 IGRA     | £99.75  | £13.68      | 19.07714      | 0.00145       | 5.22853    | £9,404  |
|           | 55 IGRA     | £110.09 | £20.37      | 19.07714      | 0.00145       | 5.7707     | £14,006 |
|           | 65 IGRA     | £120.43 | £27.07      | 19.07714      | 0.00145       | 6.31287    | £18,609 |
|           | 75 IGRA     | £130.77 | £33.77      | 19.07714      | 0.00145       | 6.85503    | £23,212 |
|           | 85 IGRA     | £141.12 | £40.46      | 19.07714      | 0.00145       | 7.3972     | £27,815 |
|           | 95 IGRA     | £151.46 | £47.16      | 19.07714      | 0.00145       | 7.93937    | £32,418 |

| IGRA Cost | Strategy    | Cost    | Incremental |               | Incremental   |            | ICER    |
|-----------|-------------|---------|-------------|---------------|---------------|------------|---------|
|           |             |         | Cost        | Effectiveness | Effectiveness | Cost / Eff |         |
|           | 45 IGRA+TST | £100.15 | £0.41       | 19.07569      | -0.00145      | 5.25017    | -£278   |
|           | 55 IGRA+TST | £103.80 | £0.00       | 19.07569      | 0             | 5.44137    | £0      |
|           | 65 IGRA+TST | £107.45 | £0.00       | 19.07569      | 0             | 5.63257    | £0      |
|           | 75 IGRA+TST | £111.09 | £0.00       | 19.07569      | 0             | 5.82377    | £0      |
|           | 85 IGRA+TST | £114.74 | £0.00       | 19.07569      | 0             | 6.01498    | £0      |
|           | 95 IGRA+TST | £118.39 | £0.00       | 19.07569      | 0             | 6.20618    | £0      |
|           | 45 IGRA     | £99.75  | £0.00       | 19.07714      | 0             | 5.22853    | £0      |
|           | 55 IGRA     | £110.09 | £6.29       | 19.07714      | 0.00145       | 5.7707     | £4,324  |
|           | 65 IGRA     | £120.43 | £12.99      | 19.07714      | 0.00145       | 6.31287    | £8,927  |
|           | 75 IGRA     | £130.77 | £19.68      | 19.07714      | 0.00145       | 6.85503    | £13,530 |
|           | 85 IGRA     | £141.12 | £26.38      | 19.07714      | 0.00145       | 7.3972     | £18,133 |
|           | 95 IGRA     | £151.46 | £33.07      | 19.07714      | 0.00145       | 7.93937    | £22,736 |

| IGRA Cost | Strategy    | Cost    | Incremental |               | Incremental   |            | ICER    |
|-----------|-------------|---------|-------------|---------------|---------------|------------|---------|
|           |             |         | Cost        | Effectiveness | Effectiveness | Cost / Eff |         |
|           | 45 IGRA+TST | £114.23 | £14.49      | 19.07569      | -0.00145      | 5.98851    | -£9,960 |
|           | 55 IGRA+TST | £117.88 | £7.79       | 19.07569      | -0.00145      | 6.17971    | -£5,358 |
|           | 65 IGRA+TST | £121.53 | £1.10       | 19.07569      | -0.00145      | 6.37092    | -£755   |
|           | 75 IGRA+TST | £125.18 | £0.00       | 19.07569      | 0             | 6.56212    | £0      |
|           | 85 IGRA+TST | £128.82 | £0.00       | 19.07569      | 0             | 6.75332    | £0      |
|           | 95 IGRA+TST | £132.47 | £0.00       | 19.07569      | 0             | 6.94452    | £0      |
|           | 45 IGRA     | £99.75  | £0.00       | 19.07714      | 0             | 5.22853    | £0      |
|           | 55 IGRA     | £110.09 | £0.00       | 19.07714      | 0             | 5.7707     | £0      |
|           | 65 IGRA     | £120.43 | £0.00       | 19.07714      | 0             | 6.31287    | £0      |
|           | 75 IGRA     | £130.77 | £5.60       | 19.07714      | 0.00145       | 6.85503    | £3,848  |
|           | 85 IGRA     | £141.12 | £12.29      | 19.07714      | 0.00145       | 7.3972     | £8,451  |
|           | 95 IGRA     | £151.46 | £18.99      | 19.07714      | 0.00145       | 7.93937    | £13,054 |

**Suppl. Table 5**

| <b>Market Costs</b>     |                 | <b>Model</b>       |             |                      |                      |                   |             |
|-------------------------|-----------------|--------------------|-------------|----------------------|----------------------|-------------------|-------------|
| <b>Sensitivity</b>      |                 | <b>Analysis</b>    |             |                      |                      |                   |             |
| <b>5a</b>               |                 | <b>Incremental</b> |             | <b>Incremental</b>   |                      |                   |             |
| <b>IGRA Specificity</b> | <b>Strategy</b> | <b>Cost</b>        | <b>Cost</b> | <b>Effectiveness</b> | <b>Effectiveness</b> | <b>Cost / Eff</b> | <b>ICER</b> |
| 0.9                     | IGRA+TST        | £132.12            | £0.00       | 19.07438             | 0                    | 6.92651           | £0          |
| 0.91                    | IGRA+TST        | £131.48            | £0.00       | 19.07455             | 0                    | 6.89304           | £0          |
| 0.92                    | IGRA+TST        | £130.85            | £0.00       | 19.07471             | 0                    | 6.85966           | £0          |
| 0.93                    | IGRA+TST        | £130.21            | £0.00       | 19.07487             | 0                    | 6.8264            | £0          |
| 0.94                    | IGRA+TST        | £129.58            | £0.00       | 19.07504             | 0                    | 6.7933            | £0          |
| 0.95                    | IGRA+TST        | £128.96            | £0.00       | 19.0752              | 0                    | 6.76043           | £0          |
| 0.96                    | IGRA+TST        | £128.34            | £0.00       | 19.07536             | 0                    | 6.72786           | £0          |
| 0.97                    | IGRA+TST        | £127.73            | £0.00       | 19.07553             | 0                    | 6.69576           | £0          |
| 0.98                    | IGRA+TST        | £127.13            | £0.00       | 19.07569             | 0                    | 6.66433           | £0          |
| 0.99                    | IGRA+TST        | £126.55            | £0.00       | 19.07585             | 0                    | 6.63402           | £0          |
| 0.9                     | IGRA            | £212.17            | £80.05      | 19.07583             | 0.00144              | 11.12223          | £55,483     |
| 0.91                    | IGRA            | £203.90            | £72.42      | 19.07599             | 0.00145              | 10.68868          | £50,065     |
| 0.92                    | IGRA            | £195.63            | £64.79      | 19.07616             | 0.00145              | 10.25537          | £44,688     |
| 0.93                    | IGRA            | £187.38            | £57.16      | 19.07633             | 0.00145              | 9.82238           | £39,351     |
| 0.94                    | IGRA            | £179.12            | £49.54      | 19.07649             | 0.00145              | 9.38982           | £34,050     |
| 0.95                    | IGRA            | £170.89            | £41.93      | 19.07666             | 0.00146              | 8.95781           | £28,784     |
| 0.96                    | IGRA            | £162.66            | £34.32      | 19.07682             | 0.00146              | 8.5266            | £23,551     |
| 0.97                    | IGRA            | £154.46            | £26.73      | 19.07698             | 0.00146              | 8.09655           | £18,348     |
| 0.98                    | IGRA            | £146.29            | £19.16      | 19.07714             | 0.00145              | 7.66828           | £13,173     |
| 0.99                    | IGRA            | £138.18            | £11.63      | 19.0773              | 0.00145              | 7.24303           | £8,021      |

| <b>5b</b>              |                 | <b>Incremental</b> |             | <b>Incremental</b>   |                      |                   |             |
|------------------------|-----------------|--------------------|-------------|----------------------|----------------------|-------------------|-------------|
| <b>TST Specificity</b> | <b>Strategy</b> | <b>Cost</b>        | <b>Cost</b> | <b>Effectiveness</b> | <b>Effectiveness</b> | <b>Cost / Eff</b> | <b>ICER</b> |
| 0.46                   | IGRA+TST        | £145.44            | £0.00       | 19.07556             | 0                    | 7.6242            | £0          |
| 0.5                    | IGRA+TST        | £141.77            | £0.00       | 19.07558             | 0                    | 7.4322            | £0          |
| 0.54                   | IGRA+TST        | £138.11            | £0.00       | 19.07561             | 0                    | 7.2402            | £0          |
| 0.58                   | IGRA+TST        | £134.45            | £0.00       | 19.07563             | 0                    | 7.04823           | £0          |
| 0.62                   | IGRA+TST        | £130.79            | £0.00       | 19.07566             | 0                    | 6.85627           | £0          |
| 0.66                   | IGRA+TST        | £127.13            | £0.00       | 19.07569             | 0                    | 6.66433           | £0          |
| 0.7                    | IGRA+TST        | £123.47            | £0.00       | 19.07571             | 0                    | 6.47244           | £0          |
| 0.74                   | IGRA+TST        | £119.81            | £0.00       | 19.07574             | 0                    | 6.28059           | £0          |
| 0.78                   | IGRA+TST        | £116.15            | £0.00       | 19.07576             | 0                    | 6.08882           | £0          |
| 0.82                   | IGRA+TST        | £112.49            | £0.00       | 19.07579             | 0                    | 5.89716           | £0          |
| 0.86                   | IGRA+TST        | £108.84            | £0.00       | 19.07582             | 0                    | 5.70571           | £0          |
| 0.46                   | IGRA            | £146.01            | £0.57       | 19.07717             | 0.00161              | 7.65349           | £354        |
| 0.5                    | IGRA            | £146.05            | £4.27       | 19.07716             | 0.00158              | 7.65554           | £2,701      |
| 0.54                   | IGRA            | £146.09            | £7.98       | 19.07716             | 0.00155              | 7.65794           | £5,144      |
| 0.58                   | IGRA            | £146.15            | £11.70      | 19.07715             | 0.00152              | 7.66077           | £7,694      |
| 0.62                   | IGRA            | £146.21            | £15.42      | 19.07715             | 0.00149              | 7.66416           | £10,364     |
| 0.66                   | IGRA            | £146.29            | £19.16      | 19.07714             | 0.00145              | 7.66828           | £13,173     |
| 0.7                    | IGRA            | £146.39            | £22.92      | 19.07713             | 0.00142              | 7.67343           | £16,147     |
| 0.74                   | IGRA            | £146.51            | £26.71      | 19.07712             | 0.00138              | 7.68001           | £19,325     |
| 0.78                   | IGRA            | £146.68            | £30.53      | 19.0771              | 0.00134              | 7.68874           | £22,773     |
| 0.82                   | IGRA            | £146.91            | £34.42      | 19.07708             | 0.00129              | 7.70087           | £26,608     |
| 0.86                   | IGRA            | £147.25            | £38.41      | 19.07705             | 0.00124              | 7.71886           | £31,069     |

| <b>5c</b>              |          | Incremental |        | Incremental   |               | Cost / Eff | ICER    |
|------------------------|----------|-------------|--------|---------------|---------------|------------|---------|
| <b>TST Sensitivity</b> | Strategy | Cost        | Cost   | Effectiveness | Effectiveness |            |         |
| 0.65                   | IGRA+TST | £127.84     | £0.00  | 19.07536      | 0             | 6.70169    | 0       |
| 0.66                   | IGRA+TST | £127.70     | £0.00  | 19.07543      | 0             | 6.69422    | 0       |
| 0.67                   | IGRA+TST | £127.55     | £0.00  | 19.07549      | 0             | 6.68675    | 0       |
| 0.68                   | IGRA+TST | £127.41     | £0.00  | 19.07556      | 0             | 6.67928    | 0       |
| 0.69                   | IGRA+TST | £127.27     | £0.00  | 19.07562      | 0             | 6.6718     | 0       |
| 0.7                    | IGRA+TST | £127.13     | £0.00  | 19.07569      | 0             | 6.66433    | 0       |
| 0.71                   | IGRA+TST | £126.98     | £0.00  | 19.07575      | 0             | 6.65686    | 0       |
| 0.72                   | IGRA+TST | £126.84     | £0.00  | 19.07582      | 0             | 6.64939    | 0       |
| 0.73                   | IGRA+TST | £126.70     | £0.00  | 19.07588      | 0             | 6.64192    | 0       |
| 0.74                   | IGRA+TST | £126.56     | £0.00  | 19.07594      | 0             | 6.63445    | 0       |
| 0.65                   | IGRA     | £146.29     | £18.46 | 19.07714      | 0.00178       | 7.66849    | £10,385 |
| 0.66                   | IGRA     | £146.29     | £18.60 | 19.07714      | 0.00171       | 7.66845    | £10,859 |
| 0.67                   | IGRA     | £146.29     | £18.74 | 19.07714      | 0.00165       | 7.66841    | £11,369 |
| 0.68                   | IGRA     | £146.29     | £18.88 | 19.07714      | 0.00158       | 7.66837    | £11,921 |
| 0.69                   | IGRA     | £146.29     | £19.02 | 19.07714      | 0.00152       | 7.66833    | £12,520 |
| 0.7                    | IGRA     | £146.29     | £19.16 | 19.07714      | 0.00145       | 7.66828    | £13,173 |
| 0.71                   | IGRA     | £146.29     | £19.30 | 19.07714      | 0.00139       | 7.66824    | £13,885 |
| 0.72                   | IGRA     | £146.29     | £19.44 | 19.07714      | 0.00133       | 7.6682     | £14,667 |
| 0.73                   | IGRA     | £146.29     | £19.59 | 19.07714      | 0.00126       | 7.66816    | £15,529 |
| 0.74                   | IGRA     | £146.29     | £19.73 | 19.07714      | 0.0012        | 7.66812    | £16,484 |

**Suppl. table 6**

| <b>Treatment</b> |          | Incremental |        | Incremental   |               | Cost / Eff | ICER    |
|------------------|----------|-------------|--------|---------------|---------------|------------|---------|
| <b>LTBI</b>      | Strategy | Cost        | Cost   | Effectiveness | Effectiveness |            |         |
| £410             | IGRA+TST | £113.97     | £0.00  | 19.07569      | 0             | 5.97446    | £0      |
| £820             | IGRA+TST | £127.16     | £0.00  | 19.07569      | 0             | 6.66602    | £0      |
| £1,230           | IGRA+TST | £140.35     | £0.00  | 19.07569      | 0             | 7.35758    | £0      |
| £1,640           | IGRA+TST | £153.54     | £0.00  | 19.07569      | 0             | 8.04914    | £0      |
| £410             | IGRA     | £125.55     | £11.58 | 19.07714      | 0.00145       | 6.58118    | £7,963  |
| £820             | IGRA     | £146.34     | £19.18 | 19.07714      | 0.00145       | 7.67094    | £13,185 |
| £1,230           | IGRA     | £167.13     | £26.78 | 19.07714      | 0.00145       | 8.7607     | £18,408 |
| £1,640           | IGRA     | £187.92     | £34.38 | 19.07714      | 0.00145       | 9.85046    | £23,631 |

| <b>TB</b> |          | Incremental |               | Incremental   |         | Cost / Eff | ICER    |
|-----------|----------|-------------|---------------|---------------|---------|------------|---------|
| Strategy  | Cost     | Cost        | Effectiveness | Effectiveness |         |            |         |
| £2,454    | IGRA+TST | £120.59     | £0.00         | 19.07569      | 0       | 6.32187    | £0      |
| £4,908    | IGRA+TST | £127.13     | £0.00         | 19.07569      | 0       | 6.66433    | £0      |
| £7,362    | IGRA+TST | £133.66     | £0.00         | 19.07569      | 0       | 7.0068     | £0      |
| £9,816    | IGRA+TST | £140.19     | £0.00         | 19.07569      | 0       | 7.34926    | £0      |
| £2,454    | IGRA     | £141.49     | £20.89        | 19.07714      | 0.00145 | 7.41647    | £14,361 |
| £4,908    | IGRA     | £146.29     | £19.16        | 19.07714      | 0.00145 | 7.66828    | £13,173 |
| £7,362    | IGRA     | £151.09     | £17.43        | 19.07714      | 0.00145 | 7.9201     | £11,984 |
| £9,816    | IGRA     | £155.90     | £15.70        | 19.07714      | 0.00145 | 8.17191    | £10,796 |

| <b>Hepatitis</b> |          | Incremental |               | Incremental   |         | Cost / Eff | ICER    |
|------------------|----------|-------------|---------------|---------------|---------|------------|---------|
| Strategy         | Cost     | Cost        | Effectiveness | Effectiveness |         |            |         |
| £378             | IGRA+TST | £126.81     | £0.00         | 19.07569      | 0       | 6.64749    | £0      |
| £755             | IGRA+TST | £127.13     | £0.00         | 19.07569      | 0       | 6.66433    | £0      |
| £1,133           | IGRA+TST | £127.45     | £0.00         | 19.07569      | 0       | 6.68118    | £0      |
| £1,510           | IGRA+TST | £127.77     | £0.00         | 19.07569      | 0       | 6.69802    | £0      |
| £378             | IGRA     | £145.97     | £19.16        | 19.07714      | 0.00145 | 7.65148    | £13,173 |
| £755             | IGRA     | £146.29     | £19.16        | 19.07714      | 0.00145 | 7.66828    | £13,173 |
| £1,133           | IGRA     | £146.61     | £19.16        | 19.07714      | 0.00145 | 7.68509    | £13,172 |
| £1,510           | IGRA     | £146.93     | £19.16        | 19.07714      | 0.00145 | 7.70189    | £13,172 |



| <b>Suppl. Table 7 Monte Carlo Probability Sensitivity Analysis</b> |                     |                |                  |                |              | <b>Average</b> | <b>Reference No.</b> |
|--------------------------------------------------------------------|---------------------|----------------|------------------|----------------|--------------|----------------|----------------------|
| <b>Variable</b>                                                    | <b>Distribution</b> | <b>Minimum</b> | <b>Peak/Mode</b> | <b>Maximum</b> | <b>Value</b> |                |                      |
| 1. TB prevalence                                                   | Triangular          | 0.0001         | 0.0004           | 0.0010         | 0.0005       | HPA 2010       | 21                   |
| 2. LTBI prevalen                                                   | Triangular          | 0.010          | 0.035            | 0.100          | 0.0483       | Schablon 2     | 20                   |
| 3. TST specificity                                                 | Triangular          | 0.46           | 0.66             | 0.86           | 0.66         | Menzies 2C     | 15                   |
| 4. IGRA specifici                                                  | Triangular          | 0.950          | 0.980            | 0.998          | 0.976        |                | 17, 30               |
| 5. IGRA cost                                                       | Triangular          | £30.00         | £90.00           | £120.00        | £80.00       | see text       |                      |
| 6. TST cost                                                        | Triangular          | £16.00         | £45.00           | £64.00         | £41.67       | see text       |                      |
| 7. TB treatment c                                                  | Triangular          | £2,454.00      | £4,908.00        | £9,816.00      | £5,726.00    | see text       |                      |
| 8. LTBI treatmen                                                   | Triangular          | £409.50        | £819.00          | £1,638.00      | £955.50      | see text       |                      |
| 9. TST sensivity                                                   | Triangular          | 0.65           | 0.71             | 0.74           | 0.70         | Menzies 2C     | 15                   |
| 10. IGRA sensiti                                                   | Triangular          | 0.86           | 0.9              | 0.93           | 0.897        | Pai 2008       | 5                    |
| 11. TST repeat r                                                   | Triangular          | 0.07           | 0.175            | 0.35           | 0.215        | see text       |                      |
| 12. IGRA repeat                                                    | Triangular          | 0.017          | 0.035            | 0.070          | 0.040        | see text       |                      |
