# Supplementary material for: Screening of healthcare workers for tuberculosis: development and validation of a new health economic model to inform practice
Source: PubMed Central journal article supplement — BMJ Open. 2012 Mar 1;2(2):e000630. doi: 10.1136/bmjopen-2011-000630 (PMC3293131; doi:10.1136/bmjopen-2011-000630), 2012-03-01
Supplement: bmjopen-2011-000630-s3.pdf [file bmjopen-2011-000630-s3.pdf]

**Suppl.Table 1**

**Treatment costs based on NHS national tariff 2010 - 11**

|                                                               | Cost £        | Unit rate<br>£ | HRG Code | Comment  | HCW hours<br>Units | Subtotals   |
|---------------------------------------------------------------|---------------|----------------|----------|----------|--------------------|-------------|
| <b>I Treatment costs for TB</b>                               |               |                |          |          |                    |             |
| <b>A</b> Pulmonary TB = 54% cases in UK                       | £1,276        |                |          | HPA 2010 |                    | £325        |
| <b>B</b> Extra-pulmonary TB = 46% of cases in UK              | £2,062        |                |          | {3511}   |                    | £1,058      |
| <b>Mean cost</b>                                              | <b>£1,637</b> |                |          |          | <b>HCW</b>         | <b>£662</b> |
| <b>NB Add health care worker costs, contact tracing costs</b> |               |                |          |          |                    |             |
| <b>Total TB treatment costs</b>                               | <b>£4,908</b> |                |          |          |                    |             |

**A Pulmonary TB (54% of cases in UK)**

**Path Positive Test**

|   |                                              |                    |               |        |           |                 |             |
|---|----------------------------------------------|--------------------|---------------|--------|-----------|-----------------|-------------|
| 1 | New patient Respiratory Medicine OPD,CXR etc | £257               | £257          | 340    | WF01B mpc | 3               | 3           |
| 1 | Six months standard treatment                |                    |               |        |           |                 |             |
| 1 | Respiratory Medicine follow-up OPD           |                    | £130          | 340    | WF02A mpc | 2               |             |
| 1 | 2, 7 weeks                                   | £260               |               |        |           |                 | 4           |
| 1 | 4, 6 months                                  | £260               |               |        |           |                 | 4           |
| 2 | Admission required, estimate 15%             |                    |               |        |           |                 |             |
|   | Pulmonary, Pleural or other TB with CC       | Hospital Ad        | £272          | £1,811 | DZ14A     | Elective        |             |
|   | Pulmonary, Pleural or other TB without CC    | Hospital Admission |               | £1,618 | DZ14B     |                 |             |
|   | based on 20 hospital days                    |                    |               |        |           | 20              | 3           |
| 3 | No sputum, CXR suspicious                    |                    |               |        |           |                 |             |
|   | Bronchoscopy and Lavage , estimate 30%       | Day case           | £151          | £504   | DZ07Z     | Elective        | 7.5         |
|   |                                              |                    |               |        |           |                 | 2.25        |
| 4 | CT chest scan required, estimate 20%         |                    | £23           | £114   | RA08Z     |                 |             |
| 5 | after treatment e.g. cavitation              |                    |               |        |           |                 |             |
|   | Additional OPD x2, in estimate 20%           |                    | £52           |        |           |                 | 2           |
|   |                                              |                    |               |        |           |                 | 0.8         |
| 6 | Hepatitis 2.5%                               |                    |               |        |           | Saukkonen, 2006 |             |
|   | Additional OPD x3                            | £9.75              |               |        |           | 2               | 0.15        |
| 7 | Liver failure                                | Admission          | £1            | £2,715 | GC01Z     |                 | 20          |
|   |                                              |                    |               |        |           | <b>hrs</b>      | 17.05       |
|   |                                              |                    |               |        |           | <b>rate</b>     | £19.06      |
|   | <b>Subtotal PulTB 1</b>                      |                    | <b>£1,276</b> |        |           | <b>Cost</b>     | <b>£325</b> |

**Key** HRG health related group  
 OPD outpatient attendance  
 CXR chest radiograph  
 mpc multi-professional clinic  
 CC complications

| Treatment costs based on NHS national tariff 2010 - 11 |                                                                           | Cost £             | Unit rate £   | HRG Code | Comment         | HCW hours            |               |
|--------------------------------------------------------|---------------------------------------------------------------------------|--------------------|---------------|----------|-----------------|----------------------|---------------|
|                                                        |                                                                           |                    |               |          |                 | Units                | Subtotals     |
| <b>I</b>                                               | <b>Treatment costs for TB</b>                                             |                    |               |          |                 |                      |               |
| <b>B</b>                                               | <b>Extra-Pulmonary TB (46% of cases in UK)</b>                            |                    |               |          |                 |                      |               |
|                                                        | <b>Peripheral LN TB (example used)</b>                                    |                    |               |          |                 |                      |               |
| <b>Path</b>                                            | Positive Test                                                             |                    |               |          |                 |                      |               |
|                                                        | 1 New patient Respiratory Medicine OPD + CXR                              | £257               | £257 340      | WF01B    | mpc             | 3                    | 3             |
|                                                        | 1 Six months standard treatment                                           |                    |               |          |                 |                      |               |
|                                                        | 1 Respiratory Medicine follow-up OPD                                      |                    | £130 340      | WF02A    | mpc             | 2                    |               |
|                                                        | 1 2, 7 weeks                                                              | £260               |               |          |                 |                      | 4             |
|                                                        | 1 4, 6 months                                                             | £260               |               |          |                 |                      | 4             |
|                                                        | 2 Admission required, estimate 25% Pulmonary, Pleural or other TB with CC | Hospital Ad £453   | £1,811        | DZ14A    | Elective        |                      |               |
|                                                        | Pulmonary, Pleural or other TB without CC based on 20 hospital days       | Hospital Admission | £1,618        | DZ14B    |                 | 20                   | 5             |
|                                                        | 3 LN excision biopsy                                                      |                    |               |          |                 |                      |               |
|                                                        | Minor thoracic procedure                                                  | £616               | £616          | DZ06Z    | Elective        | 37.5                 | 37.5          |
|                                                        | 4 CT chest scan required, estimate 75%                                    | £86                | £114          | RA08Z    |                 |                      |               |
|                                                        | 5 after treatment                                                         |                    |               |          |                 |                      |               |
|                                                        | Additional OPD x2, in estimate 50%                                        | £130               |               |          |                 | 2                    | 2             |
|                                                        | 6 Hepatitis 2.5%                                                          |                    |               |          | Saukkonen, 2006 |                      |               |
|                                                        | Additional OPD x3                                                         | £9.75              |               |          |                 | 2                    | 0.15          |
|                                                        | 7 Liver failure                                                           | Admission          | £1            | £2,715   | GC01Z           | 20                   | 0             |
|                                                        |                                                                           |                    |               |          |                 | <b>hrs</b>           | 55.5          |
|                                                        |                                                                           |                    |               |          |                 | <b>Rate</b>          | £19.06        |
|                                                        | <b>Subtotal ExPulTB 1</b>                                                 |                    | <b>£2,062</b> |          |                 | <b>HCW time Cost</b> | <b>£1,058</b> |

| Treatment costs based on NHS national tariff 2010 - 11 |                                                | Cost £ | Unit rate £ | HRG Code | Comment | HCW hours            |             |
|--------------------------------------------------------|------------------------------------------------|--------|-------------|----------|---------|----------------------|-------------|
|                                                        |                                                |        |             |          |         | Units                | Subtotals   |
| <b>II</b>                                              | <b>Treatment costs for LTBI</b>                |        |             |          |         |                      |             |
| <b>C</b>                                               | <b>LTBI , 3 mths INAH + Rifampicin</b>         |        |             |          |         |                      |             |
| <b>Path</b>                                            | Positive test                                  |        |             |          |         |                      |             |
|                                                        | 1 New patient Respiratory Medicine OPD,CXR etc | £257   | 257 340     | WF01B    | mpc     | 3                    | 3           |
|                                                        | 1 Six months standard treatment                |        |             |          |         |                      |             |
|                                                        | 1 Respiratory Medicine follow-up OPD           |        | 130 340     | WF02A    | mpc     | 2                    |             |
|                                                        | 1 2, 7,12 weeks                                | £390   |             |          |         |                      | 6           |
|                                                        | Hepatitis risk, 1.77%                          |        |             |          |         |                      |             |
|                                                        | Additional OPD x3                              | £7     |             |          |         | 0.106                |             |
|                                                        |                                                |        |             |          |         | <b>hrs</b>           | 9.00        |
|                                                        |                                                |        |             |          |         | <b>rate</b>          | £19.06      |
|                                                        | <b>Subtotal LTBI total</b>                     |        | <b>£647</b> |          |         | <b>HCW time Cost</b> | <b>£172</b> |
|                                                        |                                                |        | <b>£819</b> |          |         |                      |             |

| Treatment costs based on NHS national tariff 2010 - 11 |                                              | Cost £        | Unit rate £ | HRG Code | Comment | HCW hours            |             |
|--------------------------------------------------------|----------------------------------------------|---------------|-------------|----------|---------|----------------------|-------------|
|                                                        |                                              |               |             |          |         | Units                | Subtotals   |
| <b>III</b>                                             | <b>Contact tracing</b>                       |               |             |          |         |                      |             |
| <b>Path</b>                                            | 5 Contacts Traced per case<br>fig 7 {3627}   | <b>£2,132</b> |             |          |         |                      | <b>£476</b> |
|                                                        | 1 Initial contact by Telephone               | 23            | £23         |          |         |                      |             |
|                                                        | 1 New patient Respiratory Medicine OPD + CXR | 257           | 257 340     | WF01B    | mpc     | 3                    | 3           |
|                                                        | 1 Respiratory Medicine follow-up OPD         | 130           | 130 340     | WF02A    | mpc     | 2                    | 2           |
|                                                        | <b>subtotal CT1</b>                          | 410           |             |          |         |                      | 5           |
|                                                        | 1% have active TB                            | £16           |             |          |         | <b>hrs rate</b>      | 5<br>£19.06 |
|                                                        | <b>subtotal CT2</b>                          | <b>£426</b>   |             |          |         | <b>HCW time Cost</b> | <b>£95</b>  |
|                                                        | <b>5 contacts per case</b>                   | <b>£2,608</b> |             |          |         |                      |             |

| Treatment costs based on NHS national tariff 2010 - 11 |                                                                          | Cost £       | Unit rate £     | HRG Code | Comment | HCW hours            |             |
|--------------------------------------------------------|--------------------------------------------------------------------------|--------------|-----------------|----------|---------|----------------------|-------------|
|                                                        |                                                                          |              |                 |          |         | Units                | Subtotals   |
| <b>IV</b>                                              | <b>Hepatitis</b>                                                         |              |                 |          |         |                      |             |
| <b>Path</b>                                            | 1 Respiratory Medicine follow-up OPD x3<br>Estimated sick leave per case | £390<br>£250 | 130 340<br>£715 | WF02A    | mpc     | 2                    | 6           |
|                                                        | Note: allocation for liver failure in TB costs<br>see IA 7               |              |                 |          |         | <b>hrs rate</b>      | 6<br>£19.06 |
|                                                        |                                                                          | <b>£640</b>  |                 |          |         | <b>HCW time Cost</b> | <b>£114</b> |
|                                                        | <b>Total</b>                                                             | <b>£755</b>  |                 |          |         |                      |             |

|          |                               |                 |               |  |  |  |  |
|----------|-------------------------------|-----------------|---------------|--|--|--|--|
| <b>V</b> | <b>Mantoux test</b>           |                 |               |  |  |  |  |
|          | Test reagents and disposables | <i>estimate</i> | £17.25        |  |  |  |  |
|          | Apply and Read Skin Test      | 2*0.33 hr a     | £12.58        |  |  |  |  |
|          | Admin, postage, stationary    |                 | £7.50         |  |  |  |  |
|          | Subtotal                      |                 | £37.33        |  |  |  |  |
|          | Overheads                     | <i>30% rate</i> | £11.20        |  |  |  |  |
|          | <b>Total</b>                  |                 | <b>£48.53</b> |  |  |  |  |

#### Reference

Saukkonen JJ et al,  
An Official ATS Statement:  
Hepatotoxicity of Antituberculosis Therapy.  
Am.J.Respir.Crit.Care Med. 174 (8):935-952, 2006.
