# Supplementary material for: Screening of healthcare workers for tuberculosis: development and validation of a new health economic model to inform practice
Source: PubMed Central journal article supplement — BMJ Open. 2012 Mar 1;2(2):e000630. doi: 10.1136/bmjopen-2011-000630 (PMC3293131; doi:10.1136/bmjopen-2011-000630), 2012-03-01
Supplement: bmjopen-2011-000630.draft_revisions.pdf [file bmjopen-2011-000630.draft_revisions.pdf]

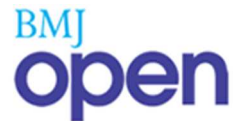

**Screening of Health Care Workers for  
Tuberculosis: Development and Validation of a New Health  
Economic Model to Inform Practice**

|                                 |                                                                                                                                                                                                                                                                                                                                                                                                                                                                                                                              |
|---------------------------------|------------------------------------------------------------------------------------------------------------------------------------------------------------------------------------------------------------------------------------------------------------------------------------------------------------------------------------------------------------------------------------------------------------------------------------------------------------------------------------------------------------------------------|
| Journal:                        | <i>BMJ Open</i>                                                                                                                                                                                                                                                                                                                                                                                                                                                                                                              |
| Manuscript ID:                  | bmjopen-2011-000630                                                                                                                                                                                                                                                                                                                                                                                                                                                                                                          |
| Article Type:                   | Research                                                                                                                                                                                                                                                                                                                                                                                                                                                                                                                     |
| Date Submitted by the Author:   | 15-Nov-2011                                                                                                                                                                                                                                                                                                                                                                                                                                                                                                                  |
| Complete List of Authors:       | Eralp, Merve; University of Cambridge, Centre for Health Leadership and Enterprise, Judge Business School<br>Scholtes, Stefan; University of Cambridge, Centre for Health Leadership and Enterprise, Judge Business School<br>Martell, Geraldine; Cambridge University Hospitals, Cambridge Centre for Occupational Health<br>Winter, Robert; Cambridge University Health Partners, Academic Health Science System<br>Exley, Andrew; Papworth Hospital NHS Foundation Trust, Pathology; Cambridge University Health Partners |
| <b>Primary Subject Heading</b>: | Health economics                                                                                                                                                                                                                                                                                                                                                                                                                                                                                                             |
| Secondary Subject Heading:      | Infectious diseases, Diagnostics, Patient-centred medicine, Immunology                                                                                                                                                                                                                                                                                                                                                                                                                                                       |
| Keywords:                       | HEALTH ECONOMICS, Tuberculosis < INFECTIOUS DISEASES, IMMUNOLOGY                                                                                                                                                                                                                                                                                                                                                                                                                                                             |
|                                 |                                                                                                                                                                                                                                                                                                                                                                                                                                                                                                                              |

SCHOLARONE™  
Manuscripts

1  
2  
3 **Screening of Health Care Workers for Tuberculosis: Development and Validation of a**  
4 **New Health Economic Model to Inform Practice**  
5  
6  
7  
8  
9

10  
11 **Merve Nazli Eralp<sup>1</sup>, Stefan Scholtes<sup>1</sup>, Geraldine Martell<sup>2</sup>, Robert Winter<sup>3</sup>, Andrew**  
12 **Robert Exley<sup>4</sup>**  
13

14  
15  
16  
17 **<sup>1</sup> Centre for Health Leadership and Enterprise, Judge Business School, University of**  
18 **Cambridge**  
19

20  
21 **<sup>2</sup> Cambridge Centre for Occupational Health, Cambridge University Hospitals**  
22

23 **<sup>3</sup> Academic Health Science System, Cambridge University Health Partners,**  
24

25 **<sup>4</sup> Department of Pathology, Papworth Hospital NHS Foundation Trust, Cambridge**  
26 **University Health Partners, Cambridge, U.K.**  
27  
28

29  
30  
31 **Correspondence to: Dr Andrew R Exley, Department of Pathology, Papworth Hospital**  
32 **NHS Foundation Trust, Papworth Everard, Cambridge, CB23 3RE.**  
33

34  
35 **Telephone: +44 (0)1480 364117 Fax: +44 (0)1480 364777**  
36

37 **Email: [andrew.exley@papworth.nhs.uk](mailto:andrew.exley@papworth.nhs.uk)**  
38  
39

40  
41  
42 **Key words: Tuberculosis; delivery of health care; cost-benefit analysis;**  
43 **tuberculin test; interferon gamma**  
44  
45

46  
47 **Word count: 2916**  
48

49 **Figures: two**  
50

51 **Tables: three**  
52

53 **Supplemental material: Excel file**  
54

55 **TreeAge Pro file available from corresponding author**  
56  
57  
58  
59  
60

## ABSTRACT

**Background:** Methods for determining the cost-effectiveness of different treatments are well established, unlike the appraisal of non-drug interventions, including novel diagnostics and biomarkers

**Objective:** We develop and validate a new health economic model by comparing the cost-effectiveness of tuberculin skin test, TST; blood test, IGRA; and TST then IGRA in conditional sequence, in screening health care workers for latent or active TB. We test the impact of key variables to inform health care provision.

**Design:** We focus on healthy life years gained as the benefit metric, rather than quality adjusted life years (QALYs) given limited data to estimate quality-adjustments of life years with TB and its complementary diseases, such as hepatitis. Healthy life years gained refers to the number of TB or complementary hepatitis cases avoided, and the increase in life expectancy. We incorporate disease and test variables informed by systematic meta-analyses and clinical practice. Health and economic outcomes of each strategy are modelled as a decision tree in Markov chains, representing different health states informed by epidemiology. Cost and effectiveness values are generated as the individual is cycled through 20 years of the model.

**Setting:** Screening health care workers in secondary and tertiary care.

**Results:** IGRA is the most effective strategy, with an incremental cost per healthy life year gained of £26,592 to £12,532 at base case and £19,968 to £5,882 for market costs, TST £45, IGRA £90, with IGRA specificities of 97% - 99%.

**Conclusions:** Incremental costs per healthy life year gained, a conservative estimate of benefit, are comparable to the £20,000 - £30,000 NICE band for IGRA alone, across wide differences in disease and test variables. Health gains justify IGRA costs, even IGRA test costs three times TST costs. This health economic model offers a powerful tool for appraising non-drug interventions in the market and under development. (300 words)

1  
2  
3  
4  
5 What this paper adds  
6  
7  
8

9 1. What is already known and why this study is required  
10

- 11 • Methods for determining the cost-effectiveness of different treatments are well  
12 established unlike the appraisal of non-drug interventions including novel diagnostics  
13 and biomarkers  
14
- 15 • We develop and validate a new health economic model by comparing cost-  
16 effectiveness of tuberculin skin test, TST and / or blood test, IGRA, in screening  
17 health care workers for latent or active TB  
18
- 19 • We investigate gains in healthy life years, without TB or hepatitis, in a comprehensive  
20 model informed by epidemiology, meta-analyses and clinical practice, testing key  
21 disease and test variables  
22
- 23
- 24
- 25
- 26
- 27
- 28
- 29
- 30

31 2. What this study adds  
32

- 33 • IGRA is the most effective strategy when screening health care workers for latent or  
34 active TB  
35
- 36 • Screening with IGRA appears cost effective since incremental costs per healthy life  
37 year gained, a conservative estimate of benefit, are at the lower end of the £20,000 to  
38 £30,000 NICE band  
39
- 40 • These findings are robust for wide differences in disease and test variables, even  
41 IGRA test costs three times TST costs suggesting this health economic model is a  
42 powerful tool for appraising non-drug interventions  
43
- 44
- 45
- 46
- 47
- 48
- 49
- 50
- 51
- 52
- 53
- 54
- 55
- 56
- 57
- 58
- 59
- 60

## ARTICLE SUMMARY

### Article focus

- Methods for determining cost-effectiveness of different treatments are well established unlike the appraisal of non-drug interventions, including novel diagnostics and biomarkers
- We develop and validate a new health economic model by comparing cost-effectiveness of tuberculin skin test, TST and / or a TB blood test, IGRA, in screening health care workers for latent or active TB
- We investigate gains in healthy life years, without TB or hepatitis, in a comprehensive model informed by epidemiology, meta-analysis and clinical practice, testing key disease and test variables

### Key messages

- IGRA is the most effective strategy when screening health care workers for latent or active TB
- IGRA screening has an incremental cost per healthy life year gained of £19,968 to £5,882 at standard market costs, TST £45, IGRA £90, for IGRA specificities of 97% - 99% respectively

### Strengths and limitations of this study

- Screening with IGRA alone appears cost effective since incremental costs per healthy life year gained, a conservative estimate of benefit, are at the lower end of the £20,000 to £30,000 NICE band
- Neither TST nor IGRA differentiate LTBI from TB, and the specificity of IGRA is inferred from studies in populations at low risk of TB
- These findings are robust for wide differences in disease and test variables, including IGRA test costs three times TST costs, suggesting this health economic model is a powerful tool for appraising non-drug interventions in the market and under development

## INTRODUCTION

Economic evaluation is a recognised approach to optimising national health care provision within a limited budget but informed choice requires transparent analysis highlighting key assumptions and critical factors<sup>1</sup>. Methods for determining the cost-effectiveness of different treatments are well established<sup>2,3</sup>, unlike the appraisal of non-drug interventions, including novel diagnostics and biomarkers. We develop and validate a new health economic model by focusing on whether a tuberculin skin test, TST, and / or a blood test for tuberculosis, IGRA, is more cost-effective in screening health care workers for latent or active tuberculosis, TB. The screening of health care workers for tuberculosis has economic importance given the impact of disease transmission in each case together with the large number of NHS employees at risk, 1.7 million personnel and 80,000 new employees per annum (National Health Service, 2010). We inform the health economic model by applying insight from epidemiology, meta-analysis, and clinical practice including market costs to compare the cost-effectiveness of new technology supporting or replacing established practice.

Established practice is for trained occupational health staff to administer a TST using cheap readily available reagents injected intradermally at an initial visit. The skin test reaction is measured at a second clinic visit 48 – 72 hours later. The need for two visits is operationally inefficient, and the test itself is limited both by specificity and sensitivity. TST has a low specificity in subjects exposed to BCG vaccination or environmental non-tuberculous mycobacteria (NTM) and moderate sensitivity resulting in false negatives<sup>4,5</sup>. A new technological approach requires a single clinic visit to draw a blood sample which is transferred to the laboratory for analysis in a TB specific interferon-gamma release assay, IGRA<sup>6</sup>. The approach is operationally efficient and the assay has a high specificity and sensitivity, although simple costs per test are greater than the TST. In principle the advantages of old and new might be combined using TST for all and then applying IGRA blood testing to TST positive cases to exclude false positive TST after previous exposure to

1  
2  
3 NTM including BCG immunisation. This third approach depends on each test having a similar  
4 sensitivity or false negative rate, so the impact of this parameter is subjected to further  
5 analysis. Following earlier work,<sup>7</sup> this study has focused on healthy life years gained as the  
6 benefit metric, rather than the more common quality adjusted life years. The reason is the  
7 lack of robust data to estimate quality-adjustments of life years with TB and its  
8 complementary diseases, such as hepatitis. Health life years gained refers to the number of  
9 TB or complementary hepatitis cases avoided, and the associated increase in life  
10 expectancy.  
11  
12  
13  
14  
15  
16  
17  
18  
19  
20

21 This study adds to the literature<sup>8, 7, 9, 10</sup> in four key areas by incorporating:  
22

- 23 1. Healthy life years to avoid the assumptions inherent in estimating QALYs
- 24 2. Key disease variables in a comprehensive model of all relevant health states informed  
25 by epidemiology including  
26  
27 i. The impact of LTBI Tuberculosis treatment side effects<sup>11</sup>  
28  
29 ii. The higher relapse rate of active TB within three years of treatment<sup>12</sup>  
30  
31 3. Key test variables relevant to clinical practice including  
32  
33 i. The inability of screening tests to differentiate between active and latent TB<sup>5</sup>  
34  
35 ii. The sensitivity and specificity of IGRA and TST independently of each other  
36  
37 iii. Operational inefficiencies of TST prompting repeat testing<sup>13</sup>  
38  
39 4. And we provide a powerful methodology for appraising the cost-effectiveness of non-  
40 drug interventions to inform health care policy, including sensitivity analyses of key  
41 variables  
42  
43  
44  
45  
46  
47  
48  
49

## 50 METHODS

51  
52 The health and economic outcomes of the three alternatives testing strategies are modelled  
53 as a decision tree, representing the health outcomes of each of the strategies as Markov  
54 chains over twenty years. The model incorporates economic, medical, epidemiological and  
55 operational factors in the analysis. This approach lends itself to the clinical setting where the  
56  
57  
58  
59  
60

1  
2  
3 risks are continuous over time, key events may be repeated, and operational factors may  
4  
5 interact with other key variables to influence the base case result.  
6  
7

### 8 9 **Data collection**

10  
11 The test, population, and outcome characteristics (**table 1**) include data from the meta-  
12  
13 analysis by Pai 2008<sup>4</sup>. In the absence of a gold standard for latent tuberculosis infection,  
14  
15 LTBI, active TB is used as a surrogate to determine assay sensitivity. Specificity for LTBI is  
16  
17 derived by testing populations at low risk of TB<sup>4, 14, 15</sup> to determine the rate of false  
18  
19 positives. We apply an IGRA specificity of 98%<sup>15</sup> for the base case analysis guided by our  
20  
21 clinical and market experience with T-Spot TB, and then examine the impact of IGRA  
22  
23 specificity in the sensitivity analyses of the cost-effectiveness model. The operational  
24  
25 characteristics of the three alternative approaches include repeat test rates due to test failure  
26  
27 and failure to attend for skin test reading. Direct and indirect costs are shown (**table 2**)  
28  
29 drawing on data supplied by NICE<sup>16</sup>, the Cambridge TB service, and the NHS National tariff  
30  
31 2010. The impact of regional or national differences in disease variables and costs are  
32  
33 examined in sensitivity analyses.  
34  
35  
36

### 37 38 **Model construction**

39  
40 We built a decision analysis model, which incorporates the health outcomes as Markov  
41  
42 chains over twenty years, to analyze three different diagnostic approaches to LTBI. This  
43  
44 model only considers the initial screening for newly hired personnel; the annual testing is  
45  
46 beyond the scope of this model. The model is coded and composed using the decision  
47  
48 analysis software TreeAge Pro Suite 2009, 2011. The states of the Markov chains represent  
49  
50 the health conditions of the individuals; following a LTBI diagnosis test and possible  
51  
52 interventions. Each Markov state length is one year. The decision is made at the first node of  
53  
54 the decision tree between three diagnosis options: TST, IGRA, and a combined sequential  
55  
56 testing strategy. The alternatives are assessed according to their cost and effectiveness  
57  
58 values over twenty years; in which the costs are direct and indirect monetary costs and their  
59  
60



effectiveness is measured by total number of healthy years. The Markov chain is implemented through 20 years, related cost and effectiveness values due to different health states are recorded as the individual is cycled through the model. All future costs are discounted at 5% per year.

**Table 1: Base Case Data for Test, Population and Outcomes Parameters**

| Parameter                                                                    | Base-case values  | Reference                           |
|------------------------------------------------------------------------------|-------------------|-------------------------------------|
| <b>1. Test characteristics</b>                                               |                   |                                     |
| Tuberculin skin test (TST)                                                   |                   |                                     |
| Specificity                                                                  | 0.59              | 4                                   |
| Sensitivity                                                                  | 0.77              | 4                                   |
| Probability a second TST is placed Repeat due to operational inefficiency    | 0.1737            | 13                                  |
| Repeat due to operational inefficiency                                       | 0.324             | Martell 2010                        |
| TB specific IFNgamma release assay (IGRA)                                    |                   |                                     |
| Specificity                                                                  | 0.98              | 15                                  |
| Sensitivity                                                                  | 0.90              | 4                                   |
| Probability a second IGRA is required Repeat due to operational inefficiency | 0.0343            | 13                                  |
| Repeat due to operational inefficiency                                       | 0                 | Martell 2010                        |
| <b>2. Population characteristics</b>                                         |                   |                                     |
| Age range                                                                    | 20 – 30           |                                     |
| Occupation                                                                   | Healthcare worker |                                     |
| BCG vaccination rates                                                        | 52.8%             | 17                                  |
| Nationality of majority                                                      | English           |                                     |
| Prevalence of LTBI                                                           | 0.035             | 17                                  |
| Prevalence of TB                                                             | 0.0001            | 18                                  |
| Probability of all causes of death                                           | 0.0045            | Office for National Statistics 2008 |
| <b>3. Probability of Outcomes</b>                                            |                   |                                     |
| Efficacy of LTBI treatment                                                   | 0.65              | 19                                  |
| Risk of hepatitis caused by treatment                                        | 0.0177            | 11                                  |
| Risk of activation of LTBI                                                   | 0.01              | 5                                   |
| Probability of relapse of TB                                                 | 0.0315            | 12                                  |
| Probability of death due to TB                                               | 0.018             | 18                                  |
| Probability of death due to hepatitis                                        | 0                 | Assumption                          |

Martell 2010: Martell G, Robinson M-J 2010, Inefficiencies and delays in healthcare worker screening for Mycobacterium tuberculosis – an audit of medical student screening. 3<sup>rd</sup> HPA Pointers (Prevention of Occupational Infections, Treatment and Exposure Reporting Strategies for Healthcare Workers) Conference, London Dec 2010. Sensitivity analyses test the impact of regional or national differences in disease variables.

**Table 2: Costs**

| Parameter                         | Base-case values                                         |
|-----------------------------------|----------------------------------------------------------|
| <b>4. Cost of Interventions</b>   |                                                          |
|                                   | <b>NICE<sup>16</sup></b>                                 |
| TST                               | £16                                                      |
| IGRA                              | £44.78                                                   |
| Chest radiograph (CXR)            | £28                                                      |
|                                   | <b>Cambridge TB Service 2010<br/>NHS National Tariff</b> |
| TB Treatment                      | £1,637 <sup>16</sup>                                     |
| Contact tracing                   | £423                                                     |
| LTBI Treatment                    | £647                                                     |
| Hepatitis Treatment               | £625                                                     |
| <b>5. Healthcare worker costs</b> |                                                          |
|                                   | <b>Cambridge TB Service 2010<br/>NHS National Tariff</b> |
|                                   | <b>Midpoint band 6 with on costs 2010</b>                |
| Time for TB treatment             | £632                                                     |
| Time for LTBI treatment           | £162                                                     |
| Time for Hepatitis treatment      | £108                                                     |
| <b>6. Discount rate</b>           | 0.05                                                     |

31 TB treatment costs derived from discussions with NICE 2010 and Cambridge TB service.

32 Total model costs for TB treatment are TB treatment, plus contact tracing x5 contacts per  
 33 case, plus health care worker time costs; for LTBI, LTBI treatment plus health care worker  
 34 time costs; for Hepatitis, Hepatitis treatment plus health care worker time costs. Sensitivity  
 35 analyses examine the impact of four fold variation in costs.  
 36  
 37  
 38  
 39  
 40  
 41  
 42

### 43 **Model construction**

44 This Markov model assumes

- 45 i. Each health state is taken as a time periods of one year, can not be left earlier and  
 46 can only last longer if the return probability is greater than zero.
- 47 ii. All patients with positive results for LTBI accept treatment, consistent with conditions  
 48 of employment in the NHS
- 49 iii. Standard Isoniazid and Rifampicin treatment for LTBI lasts three months and all  
 50 treatments are completed.  
 51  
 52  
 53  
 54  
 55  
 56  
 57  
 58  
 59  
 60

- iv. Diagnostic tests are repeated once only as required to achieve a result
- v. No diagnostic tests are repeated due to operational inefficiencies; this variable is addressed in the sensitivity analysis
- vi. The conditional probability of a positive test result in LTBI is the same as for TB
- vii. The risk of active TB in cases with false negative results is proportional to the prevalence rates of latent and active TB
- viii. The result of the second test is independent of the first in two stage testing
- ix. The effects of TB and Hepatitis are the simple sum, rather than synergistic
- x. All cases with positive TST or IGRA will have a CXR that identifies all cases of active TB. All positive CXRs are active TB
- xi. The relapse rate of TB is higher than the prevalence rate in the general population for the first three years after recovery<sup>12</sup>
- xii. The probability of continuing to have TB after standard TB treatment is the probability of relapse
- xiii. All TB is diagnosed and treated on time. The effect of late diagnosis of latent or active TB in cases with false negative results is neglected.
- xiv. An equal number of males and females make up new NHS healthcare workers
- xv. Death of an employee has no monetary cost for NHS.
- xvi. Transmission of TB to the community is modeled as a constant monetary cost for contact tracing, including screening the close contacts of the patient, and their treatment in the case of positive Tuberculosis findings.
- xvii. All employees are employed for 20 years

The comprehensive decision tree consists of 985 nodes including three similar sub-trees with different probability and cost parameters (**figure 1**). The initial analysis was then subjected to sensitivity analysis applied to key variables including IGRA sensitivity and specificity;

prevalence rates of TB and LTBI, all causes death rates; test repetition rates; market rates for TST and IGRA tests; treatment costs for TB, LTBI, and hepatitis.

## RESULTS

Base case analysis indicates the incremental cost of IGRA alone is offset by the increased effectiveness of this approach over the two stage sequential approach of TST followed by IGRA for positive TST results (**table 3a**). IGRA is the most effective strategy with an incremental effectiveness of 0.001 and an incremental cost-effectiveness ratio, ICER, of £19,545 per healthy life year gained. The strategy of TST alone is clearly inferior by all criteria. We therefore focused on further analysis of variables affecting the relative efficacy of TST + IGRA versus IGRA alone.

**Table 3 Incremental Costs Per Healthy Life Year Gained (ICER) of IGRA or TST**

| Strategy               | Cost    | Incremental Cost | Effectiveness | Incremental Effectiveness | Cost / Effectiveness | ICER                    |
|------------------------|---------|------------------|---------------|---------------------------|----------------------|-------------------------|
| <b>a. Base Case</b>    |         |                  |               |                           |                      |                         |
| IGRA+TST               | £77.12  | £0.00            | 19.07609      | 0.00000                   | 4.04                 | £0                      |
| IGRA                   | £97.85  | £20.73           | 19.07715      | 0.00106                   | 5.13                 | £19,545                 |
| TST                    | £387.11 | £289.26          | 19.07000      | -0.00715                  | 20.30                | -£40,444<br>(Dominated) |
| <b>b. Market Costs</b> |         |                  |               |                           |                      |                         |
| IGRA+TST               | £130.92 | £0.00            | 19.07609      | 0.00000                   | 6.86                 | £0                      |
| IGRA                   | £144.62 | £13.70           | 19.07715      | 0.00106                   | 7.58                 | £12,915                 |
| TST                    | £421.15 | £276.52          | 19.07000      | -0.00715                  | 22.08                | -£38,663<br>(Dominated) |

Base case, TST £16, IGRA £45; market costs TST £45, IGRA £90.

### Sensitivity analyses of disease and test variables

Sensitivity analysis of the base case model indicates that the ICER for IGRA ranges from £26,592 to £12,532 per healthy life year gained for test specificities of 97% - 99% (**figure 2a-c, suppl. table 1**). Assay sensitivity has a much smaller impact on the ICER (**figure 2d**).

The superior cost-effectiveness of IGRA was not threatened by up to ten fold increases in all cause death rates; TB death rates; prevalence of LTBI or TB; relapse rates and hepatitis

1  
2  
3 rates (**figure 2e, suppl. table 2a-f**). Varying the IGRA repeat rate from 1.5% to 15% or TST  
4  
5 repeat rate from 2.5% to 25% had little impact on the ICER which increased from £19,346 to  
6  
7 £20,744 and £17,991 to £20,591 per healthy life year gained respectively (**suppl. table 2g,**  
8  
9 **h**).

10  
11  
12  
13 The cost of TST testing by five private medical service providers was a median of £65 per  
14  
15 test, range £45 to £75, and £48.50 using itemized costings from Cambridge Occupational  
16  
17 Health. Market costs for TST significantly enhance the ICER for IGRA alone across a range  
18  
19 of IGRA costs (**figure 2f, suppl. table 3a**). In particular, the market standard test costs of  
20  
21 £45 per TST and £90 per IGRA generate an ICER of £12,915 per healthy life year gained  
22  
23 (**table 3b**). A threshold value of £30,000 per healthy life year gained is still achieved when  
24  
25 IGRA test costs are three-times TST test costs.  
26  
27

28  
29  
30 Examining the impact of assay specificity, this market standard model generates a range of  
31  
32 £19,968 to £5,882 per healthy life year gained for an IGRA specificity of 97% - 99%.  
33  
34 Sensitivity analysis for TST specificity <sup>4</sup> over a wide range, 0.46 – 0.73, suggests IGRA  
35  
36 remains the optimal strategy with costs of £1,455 to £28,455 per healthy life year gained  
37  
38 (**suppl. table 3b**).  
39  
40

41  
42 The calculation and apportionment of treatment costs is likely to vary between centres, but a  
43  
44 four fold variation in treatment costs for LTBI, TB, or hepatitis is also accommodated by the  
45  
46 market standard model (**figure 2g, suppl. table 4**).  
47  
48  
49  
50  
51  
52  
53  
54  
55  
56  
57  
58  
59  
60

## DISCUSSION

The methodology for determining the cost-effectiveness of different treatments is well established<sup>2, 3, 1</sup> in contrast to the analysis of non-drug interventions. Our health economic model suggests a methodology to appraise the host of novel diagnostics<sup>6</sup> and biomarkers generated by clinical science. Healthy life years, despite being a conservative benefit metric, may be particularly useful in evaluating novel screening and monitoring tests by avoiding the assumptions inherent in generating quality adjusted life years<sup>20, 1, 7, 10, 21</sup>. This approach, allied to the use of multiple disease states supported by epidemiological data, is far more powerful than standard comparisons since the IGRA strategy will overcome a two – three fold excess of simple test costs.

We compare the effectiveness of the diagnostic procedures by focusing on healthy life years gained,<sup>1, 7</sup> rather than quality adjusted life years<sup>20, 10, 16</sup>. The reason is there are limited data to base estimates of quality adjusted life years for each of the health states applicable to latent or active TB and its treatment<sup>22</sup>. The additional costs of IGRA alone appear justified by the health gains at £19,545 per healthy life year gained, falling to £12,915 per healthy life year when applying market costs where blood tests cost twice as much as skin tests. Our estimates are conservative in that they only take a healthy life year as a benefit (i.e. years without tuberculosis or hepatitis). Since the calculated ratio is at the lower end of the NICE band of £20,000 - £30,000, IGRA is cost-effective, even at the current NICE threshold which may or may not be conservative<sup>2, 3</sup>. There is no validated instrument for determining quality of life with tuberculosis<sup>23</sup>, but when such data are available it is likely that we would further improve the cost/benefit ratio.

The health economic model is sensitive to IGRA specificity, which is derived from estimates of false positives in populations at low risk of TB<sup>24 21, 15</sup>. An IGRA specificity of 98% is conservative by current literature<sup>24 21, 15</sup> but higher than analyses potentially confounded by data from studies in populations at intermediate rather than low risk of TB<sup>4, 14, 16</sup>. Our model

1  
2  
3 accommodates substantial enhancement of TST specificity greater than expected in BCG-  
4 vaccinated populations, but the outcome may be different in non-BCG vaccinated  
5  
6 populations with low NTM infection rates<sup>4</sup>. The study's findings also accommodate wide  
7  
8 regional or national differences in disease variables, although health gains are enhanced by  
9  
10 a relative increase in the prevalence of LTBI and hampered by doubling costs for the  
11  
12 treatment of LTBI.  
13

14  
15  
16  
17 The one-stop approach of IGRA alone has additional, operational advantages which are  
18  
19 likely to enhance the value of this strategy. Testing at a single visit boosts compliance whilst  
20  
21 minimising consumption of resources to achieve a test result and the risk of loss to follow up.  
22  
23 The health economic model does not include an allowance for health care workers time to  
24  
25 attend for testing, but staff costs are greater when two – three visits are required for TST  
26  
27 then IGRA. Efficiency is enhanced by combining IGRA with other screening blood tests,  
28  
29 although a blood sample is more invasive than TST. Blood testing may offer more flexibility  
30  
31 than TST with blood sampling facilities widely available in primary care and hospital settings.  
32  
33 In contrast, there is a premium on the skills and training required to accurately place and  
34  
35 measure TST which may be limiting during peaks in demand such as in contact tracing. An  
36  
37 IGRA strategy transfers costs from the clinic to the laboratory, where cost pressures are  
38  
39 intense but responsive to focusing expertise and optimising staffing structures. Critical  
40  
41 aspects of blood sampling are defined including the impact of the test population and  
42  
43 sampling conditions on the performance characteristics of IGRA<sup>13, 25, 26, 27</sup>. An IGRA  
44  
45 strategy also avoids the possibility of TST boosting TST responses after repeat testing<sup>5</sup> or  
46  
47 IGRA responses if follow-up testing is delayed<sup>26</sup>. The relative merits of different IGRA tests  
48  
49 are controversial<sup>21, 15, 4</sup> but where there is a consensus on the assay characteristics this  
50  
51 model should allow further investigation.  
52  
53  
54  
55

56 Our study suggests health gains justify IGRA costs when screening health care workers for  
57  
58 latent or active TB. These findings are robust for wide differences in key disease and test  
59  
60

1  
2  
3 variables including IGRA test costs three times TST costs, whilst maintaining cost-  
4  
5 effectiveness at the lower end of the £20,000 - £30,000 NICE band. We suggest this health  
6  
7 economic model incorporating healthy life years gained, epidemiology, meta-analyses and  
8  
9 clinical practice provides a powerful tool for assessing the potential impact of new technology  
10  
11 on established practice.  
12  
13  
14  
15  
16  
17  
18  
19  
20  
21  
22  
23  
24  
25  
26  
27  
28  
29  
30  
31  
32  
33  
34  
35  
36  
37  
38  
39  
40  
41  
42  
43  
44  
45  
46  
47  
48  
49  
50  
51  
52  
53  
54  
55  
56  
57  
58  
59  
60

For peer review only



## Figures

### Figure 1: The Decision Tree

Health and economic outcomes of TST and / or IGRA modeled as a decision tree in Markov chains representing different health states informed by epidemiology: TB, active tuberculosis; LTBI, LTBI1, latent tuberculosis, with treatment; D, Death; S, S1, healthy, with unnecessary treatment for LTBI ; H, H+TB, H+LTBI, hepatitis, and TB, or LTBI; T1, T2, T1H, T2H, transition states indicating relapse rates within three years of treatment and thereafter, with hepatitis; A – E, node points repeated as Clone A - Clone E.  $X, Y$  are probabilities,  $X = p_{LTBI} / (p_{LTBI} + p_{TB})$ ,  $Y = p_{TB} / (p_{LTBI} + p_{TB})$

### Figure 2: Impact of Wide Differences in Disease and Test Variables on Cost-Effectiveness

**a – c** IGRA specificity versus **a** overall costs in £ Sterling, **b** cost / effectiveness, **c** ICER, incremental cost per healthy life year gained. **d - f** ICER in the base case model versus **d** IGRA sensitivity, **e** key disease variables increased times ten, prev prevalence, **f** TST and IGRA costs. **g** ICER in the market case model versus four fold variation in treatment costs.

### **Acknowledgements**

We thank Mary-Jane Robinson, Nurse Manager, Cambridge Centre for Occupational Health, who with Geraldine Martell provided data from “Inefficiencies and delays in healthcare worker screening for Mycobacterium tuberculosis – an audit of medical student screening”; Edward Mwarangu, National Institute for Health and Clinical Excellence for discussing costings data during consultation prior to publication of CG117<sup>16</sup>; and Emma Harris, Nurse Specialist, University Hospitals Cambridge TB service, for help in generating additional costings data.

### **Funding**

This research received no specific grant from any funding agency in the public, commercial or not-for-profit sectors

### **Competing Interests**

NE has no competing interests; SS has no competing interests; GM has no competing interests; RW has no competing interests. AE is the director of the specialist Immunology Laboratory at Papworth Hospital NHS Foundation Trust which provides a supra-regional service for interferon-gamma release assays using the T-Spot TB test (Oxford Immunotech).

### **Contributor Statement**

AE & RW conceived the study. SS and MN developed the economic model with additional clinical data from GM, AE, RW. MN, SS, AE, tested and revised the economic model. All authors contributed to the interpretation of the results and approved the final version.

### **Provenance and peer review**

Not commissioned; externally peer reviewed

### **Data sharing statement**

The economic model run on TreeAge Pro is available from the corresponding author.

## Reference List

- (1) Trunz BB, Fine P, Dye C. Effect of BCG vaccination on childhood tuberculous meningitis and miliary tuberculosis worldwide: a meta-analysis and assessment of cost-effectiveness. *Lancet* 2006; 367(9517):1173-1180.
- (2) Towse A. Should NICE's threshold range for cost per QALY be raised? Yes. *BMJ* 2009; 338:b181. doi: 10.1136/bmj.b181.:b181.
- (3) Raftery J. Should NICE's threshold range for cost per QALY be raised? No. *BMJ* 2009; 338:b185. doi: 10.1136/bmj.b185.:b185.
- (4) Pai M, Zwerling A, Menzies D. Systematic Review: T-Cell-Based Assays for the Diagnosis of Latent Tuberculosis Infection: An Update. *Ann Intern Med* 2008; 149(3):177-184.
- (5) Mack U, Migliori GB, Sester M, Rieder HL, Ehlers S, Goletti D et al. LTBI: latent tuberculosis infection or lasting immune responses to *M. tuberculosis*? A TBNET consensus statement. *Eur Respir J* 2009; 33(5):956-973.
- (6) Lalvani A. Diagnosing Tuberculosis Infection in the 21st Century: New Tools To Tackle an Old Enemy. *Chest* 2007; 131(6):1898-1906.
- (7) Diel R, Wrighton-Smith P, Zellweger JP. Cost-effectiveness of interferon- $\gamma$  release assay testing for the treatment of latent tuberculosis. *Eur Respir J* 2007; 30(2):321-332.
- (8) Diel R, Nienhaus A, Lange C, Schaberg T. Cost-optimisation of screening for latent tuberculosis in close contacts. *Eur Respir J* 2006; 28(1):35-44.
- (9) Diel R, Schaberg T, Loddenkemper R, Welte T, Nienhaus A. Enhanced cost-benefit analysis of strategies for LTBI screening and INH chemoprevention in Germany. *Respiratory Medicine* 2009; 103(12):1838-1853.
- (10) de Perio MA, Tsevat J, Roselle GA, Kralovic SM, Eckman MH. Cost-effectiveness of Interferon Gamma Release Assays vs Tuberculin Skin Tests in Health Care Workers. *Arch Intern Med* 2009; 169(2):179-187.
- (11) Hong Kong Chest Service, Tuberculosis Research Centre M, British Medical Research Council. A double-blind placebo-controlled clinical trial of three antituberculosis chemoprophylaxis regimens in patients with silicosis in Hong Kong. *Am Rev Respir Dis* 1992; 145(1):36-41.
- (12) British Thoracic Society. A controlled trial of 6 months' chemotherapy in pulmonary tuberculosis. Final report: results during the 36 months after the end of chemotherapy and beyond. *Br J Dis Chest* 1984; 78(4):330-336.
- (13) Dosanjh DPS, Hinks TSC, Innes JA, Deeks JJ, Pasvol G, Hackforth S et al. Improved Diagnostic Evaluation of Suspected Tuberculosis in Routine Practice. *Ann Intern Med* 2008; 148(5):325-336.
- (14) Lee K, Han M-K, Choi H-R, Choi C-M, Oh Y-M, Lee S-D et al. Annual Incidence of Latent Tuberculosis Infection among Newly Employed Nurses at a Tertiary Care

- 1  
2  
3 University Hospital. *Infection Control and Hospital Epidemiology* 2009; 30(12):1218-  
4 1222.
- 5  
6 (15) Diel R, Goletti D, Ferrara G, Bothamley G, Cirillo D, Kampmann B et al. Interferon-  
7 gamma release assays for the diagnosis of latent M. tuberculosis infection: A  
8 systematic review and meta-analysis. *Eur Respir J* 2011; 37(1):88-99.
- 9  
10 (16) National Institute for Health and Clinical Excellence. Clinical diagnosis and  
11 management of Tuberculosis, and measures for its prevention and control. *NICE*  
12 *Clinical Guidelines* 2011; CG117:1-64.
- 13  
14 (17) Schablon A, Beckmann G, Harling M, Diel R, Nienhaus A. Prevalence of latent  
15 tuberculosis infection among health care workers in a hospital for pulmonary  
16 diseases. *Journal of Occupational Medicine and Toxicology* 2009; 4(1):1.
- 17  
18 (18) Health Protection Agency. Tuberculosis in the U.K. Annual Report on Tuberculosis  
19 Surveillance in the U.K. 2009. *HPA Reports* 2010.
- 20  
21 (19) National Collaborating Centre for Chronic Conditions. Tuberculosis: Clinical diagnosis  
22 and management of tuberculosis and measures for its prevention and control. *Royal College*  
23 *of Physicians, London* 2006; ISBN 1 86016 227 0.
- 24  
25 (20) Griebisch I, Coast J, Brown J. Quality-adjusted life-years lack quality in pediatric care:  
26 a critical review of published cost-utility studies in child health. *Pediatrics* 2005;  
27 115(5):e600-e614.
- 28  
29 (21) Pooran A, Booth H, Miller RF, Scott G, Badri M, Huggett JF et al. Different screening  
30 strategies (single or dual) for the diagnosis of suspected latent tuberculosis: a cost  
31 effectiveness analysis. *BMC Pulm Med* 2010; 10:7.
- 32  
33 (22) Miller TL, McNabb SJN, Hilsenrath P, Pasipanodya J, Weis SE. Personal and  
34 Societal Health Quality Lost to Tuberculosis. *PLoS ONE* 2009; 4(4):e5080.
- 35  
36 (23) Guo N, Marra F, Marra CA. Measuring health-related quality of life in tuberculosis: a  
37 systematic review. *Health Qual Life Outcomes* 2009; 7:14.:14.
- 38  
39 (24) Bienek DR, Chang CK. Evaluation of an interferon-gamma release assay, T-  
40 SPOT.TB, in a population with a low prevalence of tuberculosis. *Int J Tuberc Lung*  
41 *Dis* 2009; 13(11):1416-1421.
- 42  
43 (25) Ferrara G, Losi M, D'Amico R, Roversi P, Piro R, Meacci M et al. Use in routine  
44 clinical practice of two commercial blood tests for diagnosis of infection with  
45 *Mycobacterium tuberculosis*: a prospective study. *Lancet* 2006; 367(9519):1328-  
46 1334.
- 47  
48 (26) van Zyl-Smit RN, Pai M, Peprah K, Meldau R, Kieck J, Juritz J et al. Within-Subject  
49 Variability and Boosting of T-Cell Interferon- $\gamma$  Responses after Tuberculin  
50 Skin Testing. *Am J Respir Crit Care Med* 2009; 180(1):49-58.
- 51  
52 (27) Herrera V, Yeh E, Murphy K, Parsonnet J, Banaei N. Immediate incubation reduces  
53 indeterminate results for QuantiFERON-TB Gold in-tube assay. *J Clin Microbiol* 2010;  
54 48(8):2672-2676.
- 55  
56  
57  
58  
59  
60

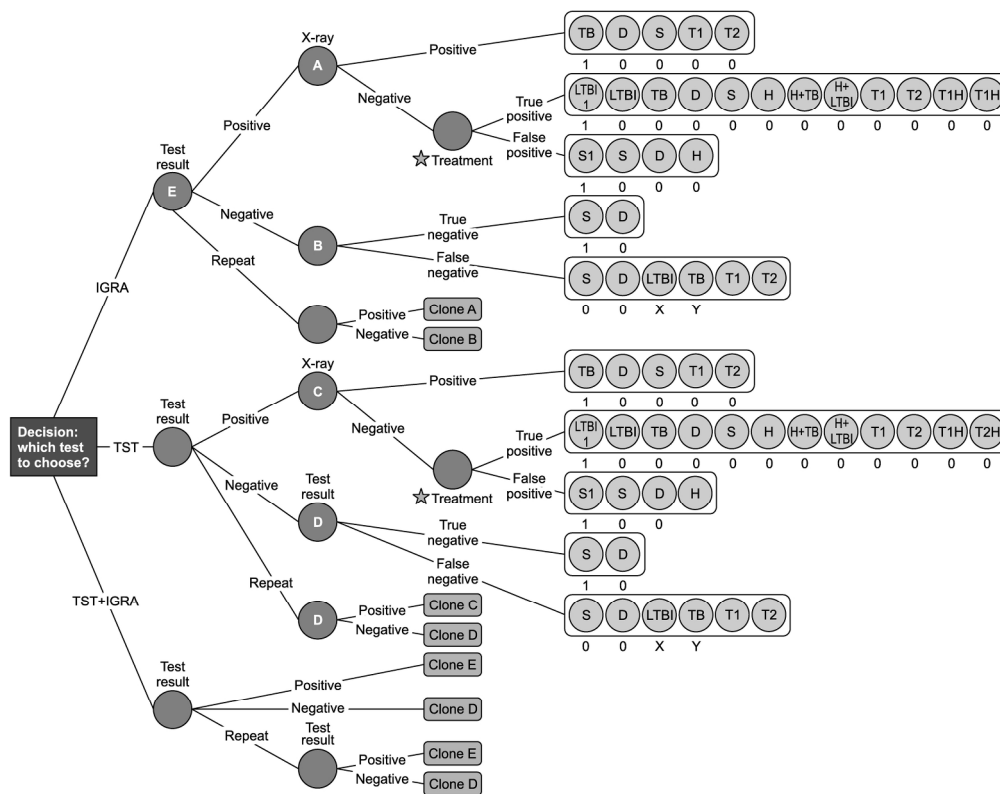

Figure 1: The Decision Tree

Health and economic outcomes of TST and / or IGRA modeled as a decision tree in Markov chains representing different health states informed by epidemiology: TB, active tuberculosis; LTBI, LTBI1, latent tuberculosis, with treatment; D, Death; S, S1, healthy, with unnecessary treatment for LTBI ; H, H+TB, H+LTBI, hepatitis, and TB, or LTBI; T1, T2, T1H, T2H, transition states indicating relapse rates within three years of treatment and thereafter, with hepatitis; A – E, node points repeated as Clone A - Clone E. X, Y are probabilities,  $X = p_{LTBI} / (p_{LTBI} + p_{TB})$ ,  $Y = p_{TB} / (p_{LTBI} + p_{TB})$

205x161mm (300 x 300 DPI)

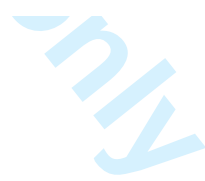

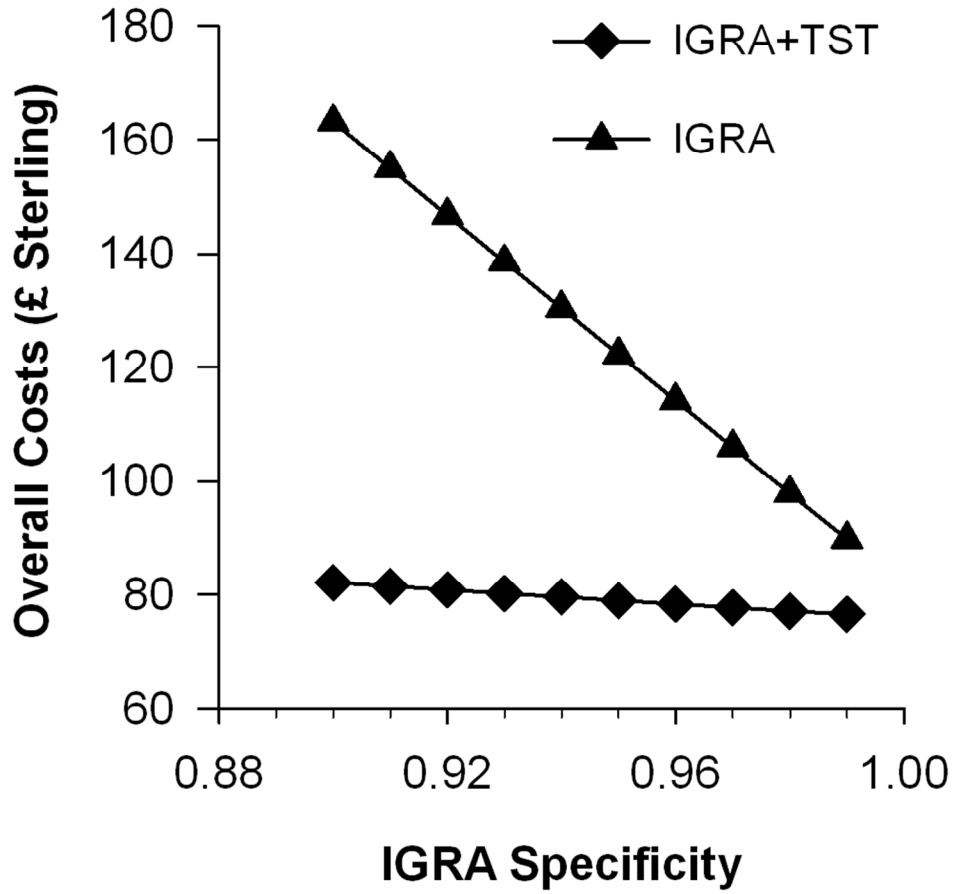

figure 2a  
Figure 2: Impact of Wide Differences in Disease and Test Variables on Cost-Effectiveness

a IGRA specificity versus a overall costs in £ Sterling  
88x85mm (300 x 300 DPI)

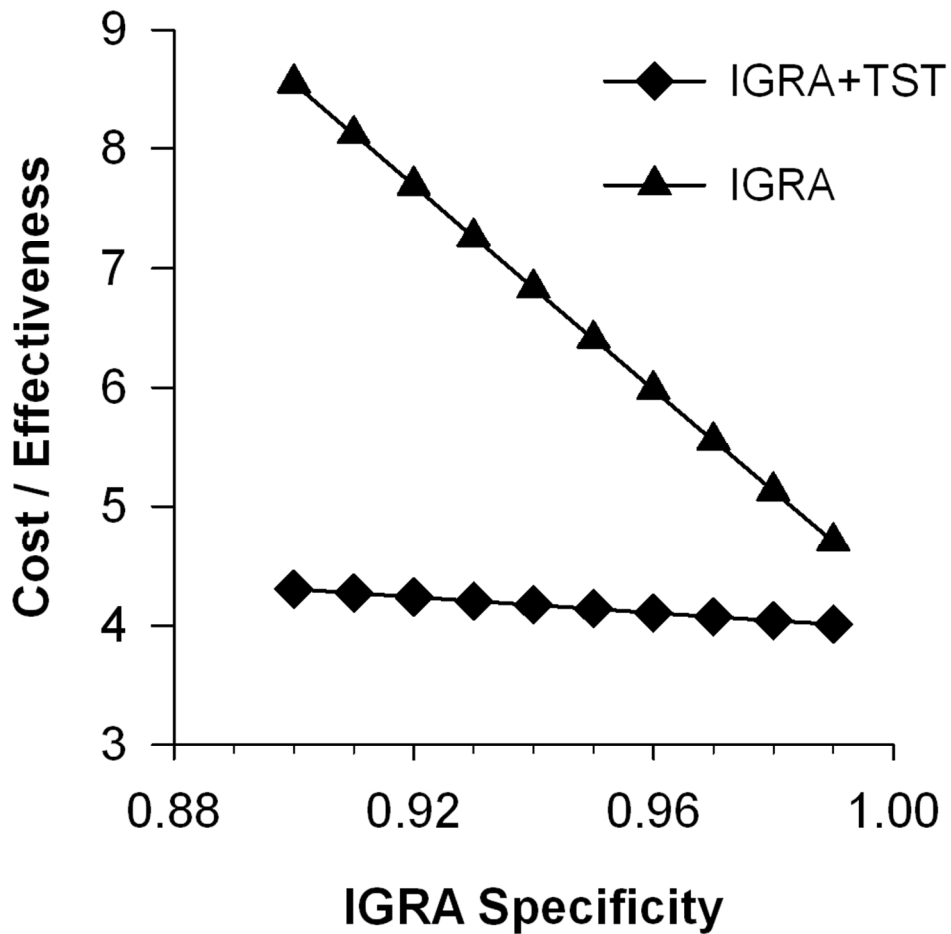

figure 2b  
 Figure 2:  
 Impact of Wide Differences in Disease and Test Variables on Cost-Effectiveness

IGRA specificity versus cost / effectiveness

88x89mm (300 x 300 DPI)

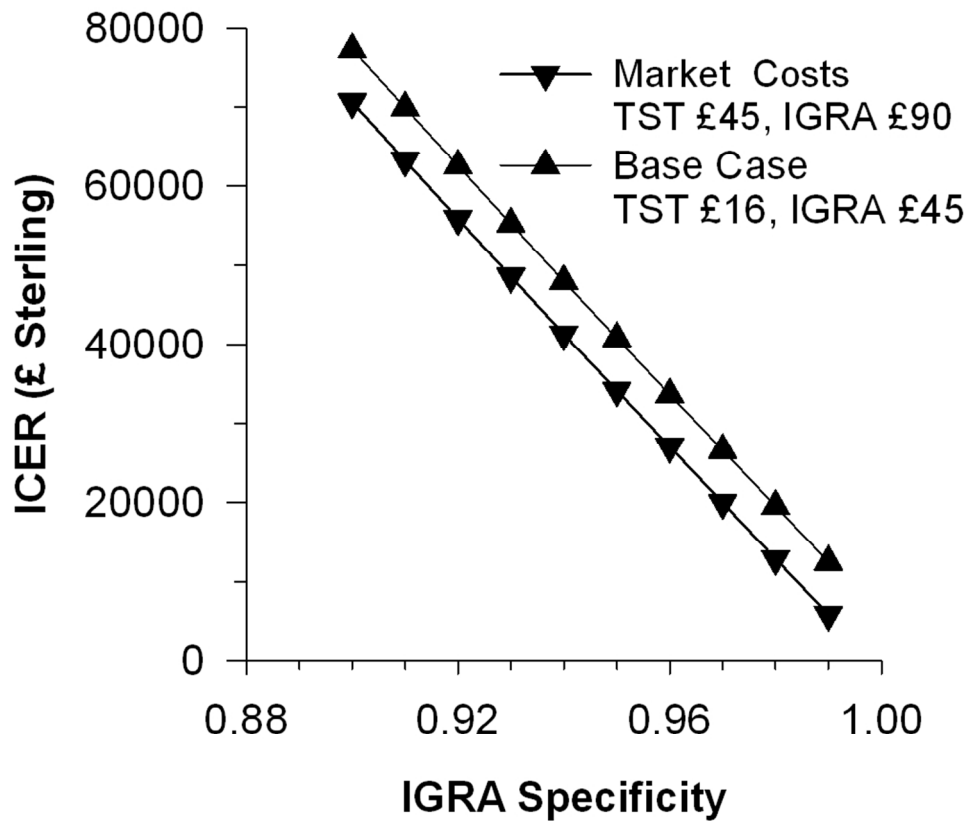

figure 2c  
 Figure 2:  
 Impact of Wide Differences in Disease and Test Variables on Cost-Effectiveness  
 IGRA specificity versus ICER, incremental cost per healthy life year gained.

88x77mm (300 x 300 DPI)

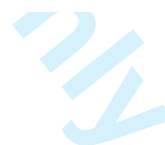



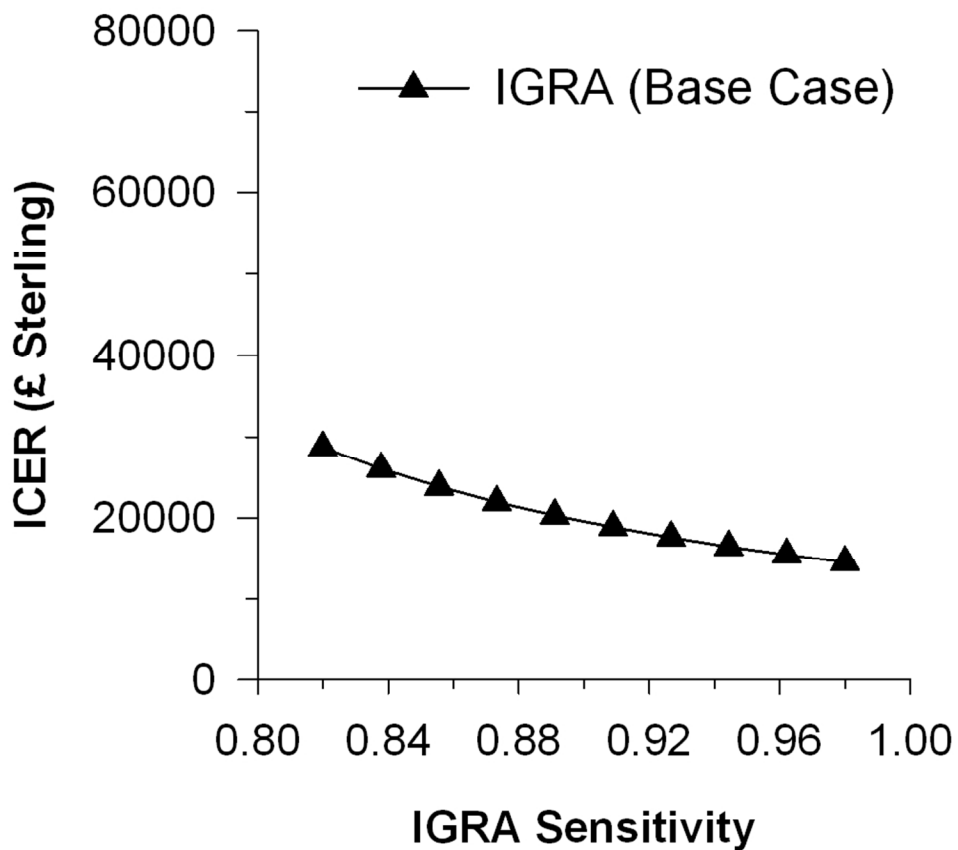

figure 2d  
 Figure 2:  
 Impact of Wide Differences in Disease and Test Variables on Cost-Effectiveness

IGRA sensitivity vs ICER, incremental cost per healthy life year gained. in the base case model  
 88x81mm (300 x 300 DPI)

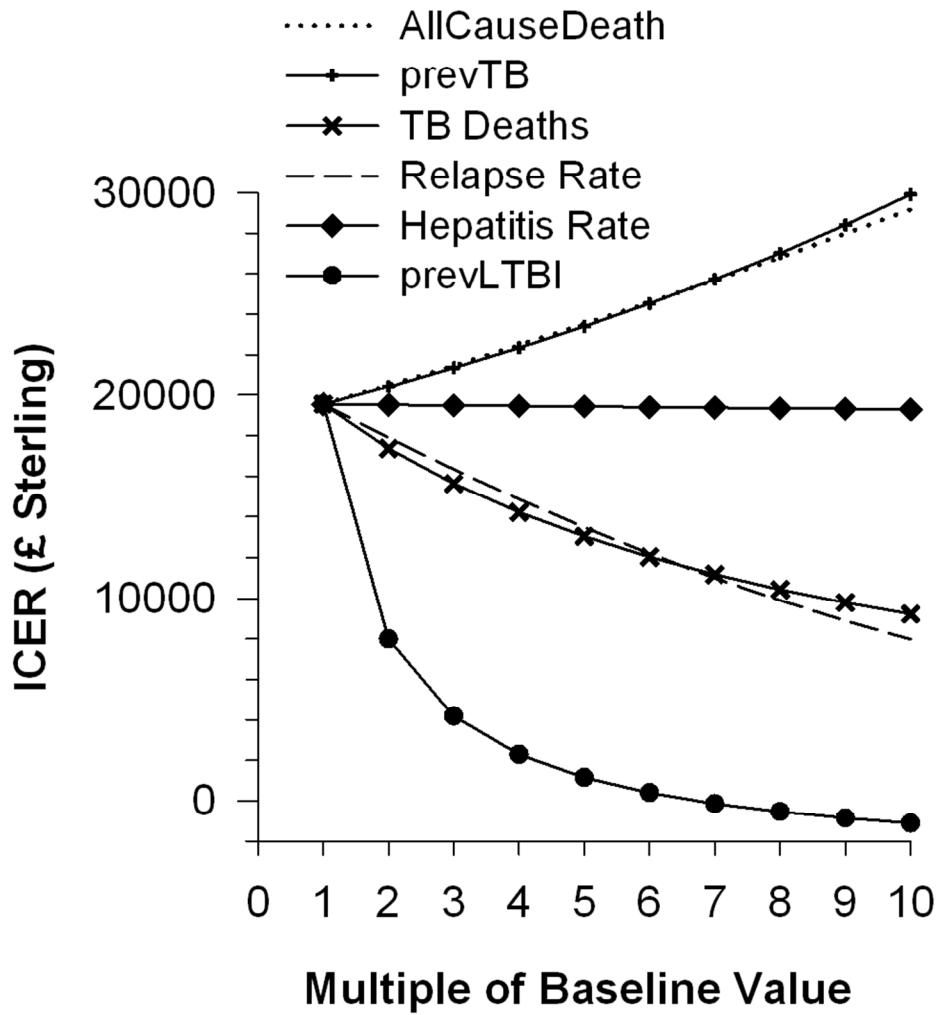

figure 2e  
 Figure 2:  
 Impact of Wide Differences in Disease and Test Variables on Cost-Effectiveness

ICER, incremental cost per healthy life year gained, in the base case model versus key disease variables increased times ten, prev prevalence  
 88x94mm (300 x 300 DPI)

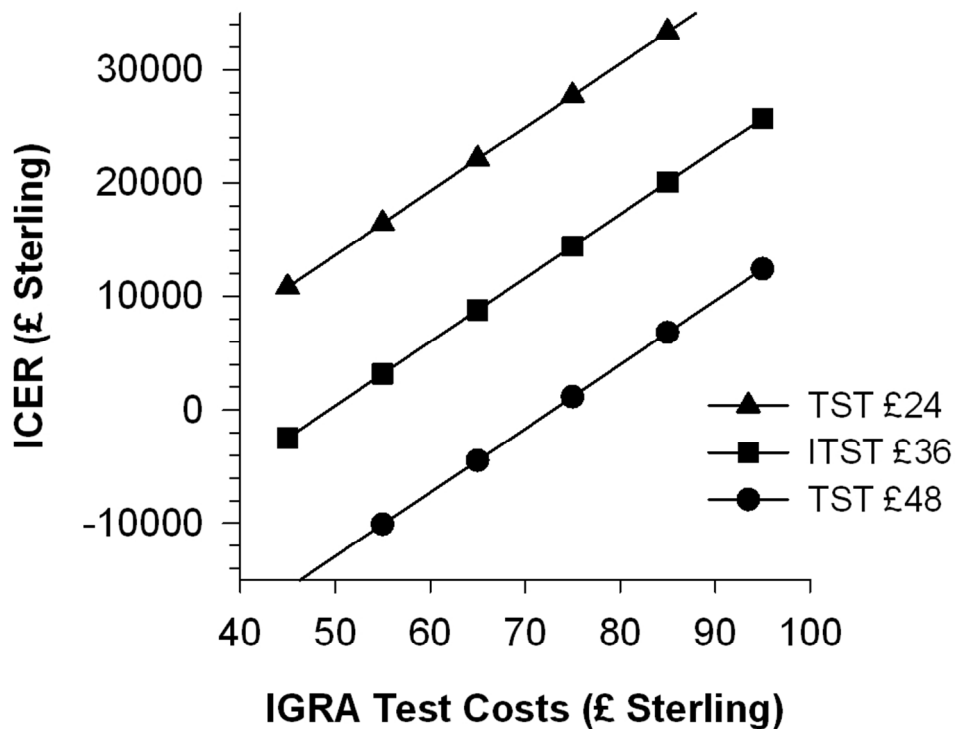

figure 2f  
 Figure 2:  
 Impact of Wide Differences in Disease and Test Variables on Cost-Effectiveness

ICER, incremental cost per healthy life year gained, in the base case model versus TST and IGRA costs  
 88x71mm (300 x 300 DPI)

only

1  
2  
3  
4  
5  
6  
7  
8  
9  
10  
11  
12  
13  
14  
15  
16  
17  
18  
19  
20  
21  
22  
23  
24  
25  
26  
27  
28  
29  
30  
31  
32  
33  
34  
35  
36  
37  
38  
39  
40  
41  
42  
43  
44  
45  
46  
47  
48  
49  
50  
51  
52  
53  
54  
55  
56  
57  
58  
59  
60

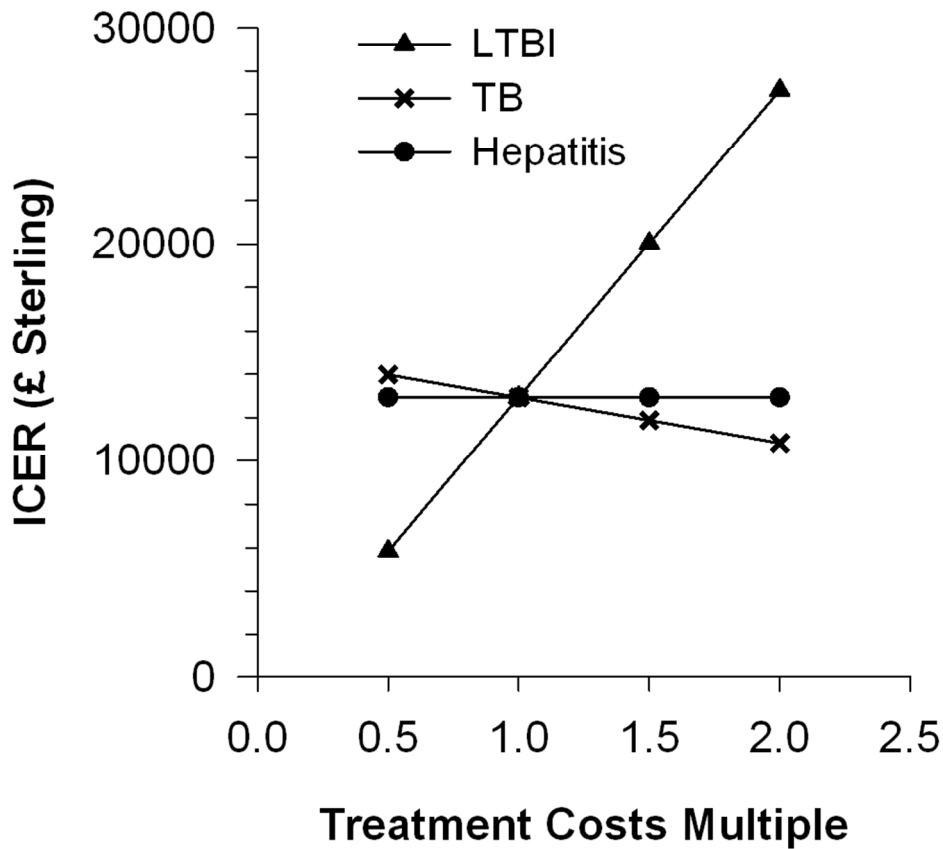

figure 2g  
Figure 2:  
Impact of Wide Differences in Disease and Test Variables on Cost-Effectiveness

ICER, incremental cost per healthy life year gained, in the market case model versus four fold variation in treatment costs  
88x81mm (300 x 300 DPI)

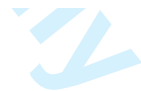

Health Economic Models Inform Screening for Tuberculosis

| Suppl.Table 1 |          | Sensitivity Analysis |        |               |               |            | Incremental Cost-Effectiveness Ratio (ICER) |  |
|---------------|----------|----------------------|--------|---------------|---------------|------------|---------------------------------------------|--|
| 1a            |          |                      |        |               |               |            |                                             |  |
| IGRA          |          | Incremental          |        | Incremental   |               |            |                                             |  |
| Specificity   | Strategy | Cost                 | Cost   | Effectiveness | Effectiveness | Cost / Eff | ICER                                        |  |
| 0.9           | IGRA+TST | £82.10               | £0.00  | 19.07479      | 0             | 4.30       | £0                                          |  |
| 0.91          | IGRA+TST | £81.47               | £0.00  | 19.07495      | 0             | 4.27       | £0                                          |  |
| 0.92          | IGRA+TST | £80.83               | £0.00  | 19.07511      | 0             | 4.24       | £0                                          |  |
| 0.93          | IGRA+TST | £80.20               | £0.00  | 19.07528      | 0             | 4.20       | £0                                          |  |
| 0.94          | IGRA+TST | £79.57               | £0.00  | 19.07544      | 0             | 4.17       | £0                                          |  |
| 0.95          | IGRA+TST | £78.95               | £0.00  | 19.07561      | 0             | 4.14       | £0                                          |  |
| 0.96          | IGRA+TST | £78.33               | £0.00  | 19.07577      | 0             | 4.11       | £0                                          |  |
| 0.97          | IGRA+TST | £77.72               | £0.00  | 19.07593      | 0             | 4.07       | £0                                          |  |
| 0.98          | IGRA+TST | £77.12               | £0.00  | 19.07609      | 0             | 4.04       | £0                                          |  |
| 0.99          | IGRA+TST | £76.54               | £0.00  | 19.07625      | 0             | 4.01       | £0                                          |  |
| 0.9           | IGRA     | £163.06              | £80.96 | 19.07583      | 0.00105       | 8.55       | £77,380                                     |  |
| 0.91          | IGRA     | £154.88              | £73.41 | 19.07600      | 0.00105       | 8.12       | £69,936                                     |  |
| 0.92          | IGRA     | £146.71              | £65.87 | 19.07617      | 0.00105       | 7.69       | £62,562                                     |  |
| 0.93          | IGRA     | £138.54              | £58.34 | 19.07633      | 0.00106       | 7.26       | £55,253                                     |  |
| 0.94          | IGRA     | £130.38              | £50.80 | 19.07650      | 0.00106       | 6.83       | £48,005                                     |  |
| 0.95          | IGRA     | £122.22              | £43.27 | 19.07667      | 0.00106       | 6.41       | £40,816                                     |  |
| 0.96          | IGRA     | £114.08              | £35.75 | 19.07683      | 0.00106       | 5.98       | £33,680                                     |  |
| 0.97          | IGRA     | £105.95              | £28.24 | 19.07699      | 0.00106       | 5.55       | £26,592                                     |  |
| 0.98          | IGRA     | £97.85               | £20.73 | 19.07715      | 0.00106       | 5.13       | £19,545                                     |  |
| 0.99          | IGRA     | £89.79               | £13.25 | 19.07731      | 0.00106       | 4.71       | £12,532                                     |  |
| 1b            |          | Incremental          |        | Incremental   |               |            |                                             |  |
| IGRA          |          | Cost                 |        | Effectiveness |               |            |                                             |  |
| Sensitivity   | Strategy | Cost                 | Cost   | Effectiveness | Effectiveness | Cost / Eff | ICER                                        |  |
| 0.82          | IGRA+TST | £74.96               | £0.00  | 19.07605      | 0             | 3.93       | £0                                          |  |
| 0.84          | IGRA+TST | £75.44               | £0.00  | 19.07606      | 0             | 3.95       | £0                                          |  |
| 0.86          | IGRA+TST | £75.92               | £0.00  | 19.07607      | 0             | 3.98       | £0                                          |  |
| 0.87          | IGRA+TST | £76.40               | £0.00  | 19.07608      | 0             | 4.00       | £0                                          |  |
| 0.89          | IGRA+TST | £76.88               | £0.00  | 19.07609      | 0             | 4.03       | £0                                          |  |
| 0.91          | IGRA+TST | £77.36               | £0.00  | 19.07610      | 0             | 4.06       | £0                                          |  |
| 0.93          | IGRA+TST | £77.84               | £0.00  | 19.07611      | 0             | 4.08       | £0                                          |  |
| 0.94          | IGRA+TST | £78.32               | £0.00  | 19.07612      | 0             | 4.11       | £0                                          |  |
| 0.96          | IGRA+TST | £78.80               | £0.00  | 19.07612      | 0             | 4.13       | £0                                          |  |
| 0.98          | IGRA+TST | £79.28               | £0.00  | 19.07613      | 0             | 4.16       | £0                                          |  |
| 0.82          | IGRA     | £96.44               | £21.48 | 19.07680      | 0.00075       | 5.06       | £28,691                                     |  |
| 0.84          | IGRA     | £96.76               | £21.31 | 19.07688      | 0.00082       | 5.07       | £26,062                                     |  |
| 0.86          | IGRA     | £97.07               | £21.15 | 19.07696      | 0.00089       | 5.09       | £23,839                                     |  |
| 0.87          | IGRA     | £97.38               | £20.98 | 19.07704      | 0.00096       | 5.10       | £21,937                                     |  |
| 0.89          | IGRA     | £97.69               | £20.82 | 19.07711      | 0.00103       | 5.12       | £20,289                                     |  |
| 0.91          | IGRA     | £98.01               | £20.65 | 19.07719      | 0.00110       | 5.14       | £18,848                                     |  |
| 0.93          | IGRA     | £98.32               | £20.48 | 19.07727      | 0.00117       | 5.15       | £17,578                                     |  |
| 0.94          | IGRA     | £98.63               | £20.32 | 19.07735      | 0.00124       | 5.17       | £16,450                                     |  |
| 0.96          | IGRA     | £98.94               | £20.15 | 19.07743      | 0.00130       | 5.19       | £15,441                                     |  |
| 0.98          | IGRA     | £99.26               | £19.98 | 19.07751      | 0.00137       | 5.20       | £14,533                                     |  |

## Health Economic Models Inform Screening for Tuberculosis

## Suppl.Table 2

## 2a

| Deaths,<br>All causes | Strategy | Cost   | Incremental<br>Cost | Incremental<br>Effectiveness | Incremental<br>Effectiveness | Cost / Eff | ICER    |
|-----------------------|----------|--------|---------------------|------------------------------|------------------------------|------------|---------|
| 0.0045                | IGRA+TST | £77.12 | 0                   | 19.07609                     | 0                            | 4.04       | 0       |
| 0.009                 | IGRA+TST | £76.77 | 0                   | 18.20838                     | 0                            | 4.22       | 0       |
| 0.0135                | IGRA+TST | £76.44 | 0                   | 17.38838                     | 0                            | 4.40       | 0       |
| 0.018                 | IGRA+TST | £76.13 | 0                   | 16.61329                     | 0                            | 4.58       | 0       |
| 0.0225                | IGRA+TST | £75.83 | 0                   | 15.88045                     | 0                            | 4.77       | 0       |
| 0.027                 | IGRA+TST | £75.54 | 0                   | 15.18739                     | 0                            | 4.97       | 0       |
| 0.0315                | IGRA+TST | £75.27 | 0                   | 14.53178                     | 0                            | 5.18       | 0       |
| 0.036                 | IGRA+TST | £75.01 | 0                   | 13.91141                     | 0                            | 5.39       | 0       |
| 0.0405                | IGRA+TST | £74.76 | 0                   | 13.32422                     | 0                            | 5.61       | 0       |
| 0.045                 | IGRA+TST | £74.52 | 0                   | 12.76828                     | 0                            | 5.84       | 0       |
| 0.0045                | IGRA     | £97.85 | £20.73              | 19.07715                     | 0.00106                      | 5.13       | £19,545 |
| 0.009                 | IGRA     | £97.59 | £20.82              | 18.2094                      | 0.00102                      | 5.36       | £20,489 |
| 0.0135                | IGRA     | £97.34 | £20.90              | 17.38936                     | 9.70E-04                     | 5.60       | £21,464 |
| 0.018                 | IGRA     | £97.11 | £20.98              | 16.61422                     | 9.30E-04                     | 5.84       | £22,470 |
| 0.0225                | IGRA     | £96.88 | £21.05              | 15.88135                     | 9.00E-04                     | 6.10       | £23,508 |
| 0.027                 | IGRA     | £96.67 | £21.13              | 15.18825                     | 8.60E-04                     | 6.36       | £24,577 |
| 0.0315                | IGRA     | £96.46 | £21.19              | 14.5326                      | 8.30E-04                     | 6.64       | £25,678 |
| 0.036                 | IGRA     | £96.27 | £21.26              | 13.9122                      | 7.90E-04                     | 6.92       | £26,810 |
| 0.0405                | IGRA     | £96.08 | £21.32              | 13.32499                     | 7.60E-04                     | 7.21       | £27,975 |
| 0.045                 | IGRA     | £95.90 | £21.38              | 12.76901                     | 7.30E-04                     | 7.51       | £29,171 |

## 2b

| TB Deaths | Strategy | Cost   | Incremental<br>Cost | Incremental<br>Effectiveness | Incremental<br>Effectiveness | Cost / Eff | ICER    |
|-----------|----------|--------|---------------------|------------------------------|------------------------------|------------|---------|
| 0.018     | IGRA+TST | £77.12 | 0                   | 19.07609                     | 0                            | 4.04       | 0       |
| 0.036     | IGRA+TST | £77.11 | 0                   | 19.07543                     | 0                            | 4.04       | 0       |
| 0.054     | IGRA+TST | £77.10 | 0                   | 19.07476                     | 0                            | 4.04       | 0       |
| 0.072     | IGRA+TST | £77.09 | 0                   | 19.0741                      | 0                            | 4.04       | 0       |
| 0.09      | IGRA+TST | £77.08 | 0                   | 19.07343                     | 0                            | 4.04       | 0       |
| 0.108     | IGRA+TST | £77.06 | 0                   | 19.07277                     | 0                            | 4.04       | 0       |
| 0.126     | IGRA+TST | £77.05 | 0                   | 19.07211                     | 0                            | 4.04       | 0       |
| 0.144     | IGRA+TST | £77.04 | 0                   | 19.07145                     | 0                            | 4.04       | 0       |
| 0.162     | IGRA+TST | £77.03 | 0                   | 19.07079                     | 0                            | 4.04       | 0       |
| 0.18      | IGRA+TST | £77.02 | 0                   | 19.07013                     | 0                            | 4.04       | 0       |
| 0.018     | IGRA     | £97.85 | £20.73              | 19.07715                     | 0.00106                      | 5.13       | £19,545 |
| 0.036     | IGRA     | £97.84 | £20.74              | 19.07662                     | 0.00119                      | 5.13       | £17,370 |
| 0.054     | IGRA     | £97.83 | £20.74              | 19.07609                     | 0.00133                      | 5.13       | £15,633 |
| 0.072     | IGRA     | £97.83 | £20.74              | 19.07555                     | 0.00146                      | 5.13       | £14,214 |
| 0.09      | IGRA     | £97.82 | £20.74              | 19.07502                     | 0.00159                      | 5.13       | £13,034 |
| 0.108     | IGRA     | £97.81 | £20.74              | 19.07449                     | 0.00172                      | 5.13       | £12,037 |
| 0.126     | IGRA     | £97.80 | £20.75              | 19.07396                     | 0.00186                      | 5.13       | £11,182 |
| 0.144     | IGRA     | £97.79 | £20.75              | 19.07344                     | 0.00199                      | 5.13       | £10,443 |
| 0.162     | IGRA     | £97.78 | £20.75              | 19.07291                     | 0.00212                      | 5.13       | £9,796  |
| 0.18      | IGRA     | £97.78 | £20.75              | 19.07238                     | 0.00225                      | 5.13       | £9,226  |

Health Economic Models Inform Screening for Tuberculosis

**2c**

| Prevalence | Strategy | Cost    | Incremental Cost | Incremental Effectiveness | Incremental Effectiveness | Cost / Eff | ICER    |
|------------|----------|---------|------------------|---------------------------|---------------------------|------------|---------|
| 0.035      | IGRA+TST | £77.12  | 0                | 19.07609                  | 0                         | 4.04       | 0       |
| 0.07       | IGRA+TST | £114.72 | 0                | 19.07118                  | 0                         | 6.02       | 0       |
| 0.105      | IGRA+TST | £152.27 | 0                | 19.06629                  | 0                         | 7.99       | 0       |
| 0.14       | IGRA+TST | £189.78 | 0                | 19.0614                   | 0                         | 9.96       | 0       |
| 0.175      | IGRA+TST | £227.25 | 0                | 19.05653                  | 0                         | 11.92      | 0       |
| 0.21       | IGRA+TST | £264.69 | 0                | 19.05167                  | 0                         | 13.89      | 0       |
| 0.245      | IGRA+TST | £302.09 | £1.05            | 19.04683                  | -0.0074                   | 15.86      | -£142   |
| 0.28       | IGRA+TST | £339.45 | £4.58            | 19.042                    | -0.00841                  | 17.83      | -£545   |
| 0.315      | IGRA+TST | £376.77 | £8.07            | 19.03719                  | -0.0094                   | 19.79      | -£859   |
| 0.35       | IGRA+TST | £414.03 | £11.51           | 19.0324                   | -0.01037                  | 21.75      | -£1,110 |
| 0.035      | IGRA     | £97.85  | £20.73           | 19.07715                  | 0.00106                   | 5.13       | £19,545 |
| 0.07       | IGRA     | £131.81 | £17.09           | 19.07332                  | 0.00214                   | 6.91       | £7,986  |
| 0.105      | IGRA     | £165.69 | £13.42           | 19.0695                   | 0.00321                   | 8.69       | £4,176  |
| 0.14       | IGRA     | £199.54 | £9.76            | 19.06568                  | 0.00428                   | 10.47      | £2,283  |
| 0.175      | IGRA     | £233.38 | £6.13            | 19.06186                  | 0.00533                   | 12.24      | £1,150  |
| 0.21       | IGRA     | £267.21 | £2.52            | 19.05804                  | 0.00637                   | 14.02      | £396    |
| 0.245      | IGRA     | £301.04 | 0                | 19.05422                  | 0                         | 15.80      | £0      |
| 0.28       | IGRA     | £334.87 | 0                | 19.05041                  | 0                         | 17.58      | £0      |
| 0.315      | IGRA     | £368.70 | 0                | 19.04659                  | 0                         | 19.36      | £0      |
| 0.35       | IGRA     | £402.52 | 0                | 19.04277                  | 0                         | 21.14      | £0      |

**2d**

| Prevalence | Strategy | Cost    | Incremental Cost | Incremental Effectiveness | Incremental Effectiveness | Cost / Eff | ICER    |
|------------|----------|---------|------------------|---------------------------|---------------------------|------------|---------|
| 1.00E-04   | IGRA+TST | £77.12  | 0                | 19.07609                  | 0                         | 4.04       | 0       |
| 2.00E-04   | IGRA+TST | £77.54  | 0                | 19.07605                  | 0                         | 4.07       | 0       |
| 3.00E-04   | IGRA+TST | £77.97  | 0                | 19.07602                  | 0                         | 4.09       | 0       |
| 4.00E-04   | IGRA+TST | £78.40  | 0                | 19.07598                  | 0                         | 4.11       | 0       |
| 5.00E-04   | IGRA+TST | £78.82  | 0                | 19.07594                  | 0                         | 4.13       | 0       |
| 6.00E-04   | IGRA+TST | £79.24  | 0                | 19.0759                   | 0                         | 4.15       | 0       |
| 7.00E-04   | IGRA+TST | £79.66  | 0                | 19.07586                  | 0                         | 4.18       | 0       |
| 8.00E-04   | IGRA+TST | £80.09  | 0                | 19.07583                  | 0                         | 4.20       | 0       |
| 9.00E-04   | IGRA+TST | £80.50  | 0                | 19.07579                  | 0                         | 4.22       | 0       |
| 0.001      | IGRA+TST | £80.92  | 0                | 19.07575                  | 0                         | 4.24       | 0       |
| 1.00E-04   | IGRA     | £97.85  | £20.73           | 19.07715                  | 0.00106                   | 5.13       | £19,545 |
| 2.00E-04   | IGRA     | £98.56  | £21.01           | 19.07708                  | 0.00103                   | 5.17       | £20,422 |
| 3.00E-04   | IGRA     | £99.27  | £21.30           | 19.07701                  | 0.001                     | 5.20       | £21,353 |
| 4.00E-04   | IGRA     | £99.97  | £21.58           | 19.07694                  | 9.70E-04                  | 5.24       | £22,343 |
| 5.00E-04   | IGRA     | £100.68 | £21.86           | 19.07687                  | 9.30E-04                  | 5.28       | £23,398 |
| 6.00E-04   | IGRA     | £101.38 | £22.14           | 19.0768                   | 9.00E-04                  | 5.31       | £24,525 |
| 7.00E-04   | IGRA     | £102.08 | £22.41           | 19.07673                  | 8.70E-04                  | 5.35       | £25,731 |
| 8.00E-04   | IGRA     | £102.78 | £22.69           | 19.07667                  | 8.40E-04                  | 5.39       | £27,024 |
| 9.00E-04   | IGRA     | £103.48 | £22.97           | 19.0766                   | 8.10E-04                  | 5.42       | £28,416 |
| 0.001      | IGRA     | £104.17 | £23.25           | 19.07653                  | 7.80E-04                  | 5.46       | £29,917 |

## Health Economic Models Inform Screening for Tuberculosis

1  
2  
3  
4  
5  
6  
7  
8  
9  
10  
11  
12  
13  
14  
15  
16  
17  
18  
19  
20  
21  
22  
23  
24  
25  
26  
27  
28  
29  
30  
31  
32  
33  
34  
35  
36  
37  
38  
39  
40  
41  
42  
43  
44  
45  
46  
47  
48  
49  
50  
51  
52  
53  
54  
55  
56  
57  
58  
59  
60

| <b>2e</b>           |          | Incremental |        | Incremental   |               | Cost / Eff | ICER    |
|---------------------|----------|-------------|--------|---------------|---------------|------------|---------|
| <b>Relapse Rate</b> | Strategy | Cost        | Cost   | Effectiveness | Effectiveness |            |         |
| 0.0315              | IGRA+TST | £77.12      | 0      | 19.07609      | 0             | 4.04       | 0       |
| 0.063               | IGRA+TST | £78.03      | 0      | 19.07569      | 0             | 4.09       | 0       |
| 0.0945              | IGRA+TST | £79.05      | 0      | 19.07524      | 0             | 4.14       | 0       |
| 0.126               | IGRA+TST | £80.17      | 0      | 19.07475      | 0             | 4.20       | 0       |
| 0.1575              | IGRA+TST | £81.41      | 0      | 19.07419      | 0             | 4.27       | 0       |
| 0.189               | IGRA+TST | £82.77      | 0      | 19.07358      | 0             | 4.34       | 0       |
| 0.2205              | IGRA+TST | £84.28      | 0      | 19.07289      | 0             | 4.42       | 0       |
| 0.252               | IGRA+TST | £85.93      | 0      | 19.07213      | 0             | 4.51       | 0       |
| 0.2835              | IGRA+TST | £87.74      | 0      | 19.0713       | 0             | 4.60       | 0       |
| 0.315               | IGRA+TST | £89.72      | 0      | 19.07038      | 0             | 4.70       | 0       |
| 0.0315              | IGRA     | £97.85      | £20.73 | 19.07715      | 0.00106       | 5.13       | £19,545 |
| 0.063               | IGRA     | £98.58      | £20.54 | 19.07684      | 0.00115       | 5.17       | £17,888 |
| 0.0945              | IGRA     | £99.38      | £20.33 | 19.07649      | 0.00125       | 5.21       | £16,324 |
| 0.126               | IGRA     | £100.27     | £20.10 | 19.0761       | 0.00135       | 5.26       | £14,853 |
| 0.1575              | IGRA     | £101.25     | £19.85 | 19.07566      | 0.00147       | 5.31       | £13,475 |
| 0.189               | IGRA     | £102.34     | £19.57 | 19.07518      | 0.00161       | 5.37       | £12,191 |
| 0.2205              | IGRA     | £103.54     | £19.26 | 19.07464      | 0.00175       | 5.43       | £10,999 |
| 0.252               | IGRA     | £104.86     | £18.93 | 19.07405      | 0.00191       | 5.50       | £9,898  |
| 0.2835              | IGRA     | £106.31     | £18.56 | 19.07339      | 0.00209       | 5.57       | £8,887  |
| 0.315               | IGRA     | £107.89     | £18.17 | 19.07266      | 0.00228       | 5.66       | £7,964  |

| <b>2f</b>             |          | Incremental |        | Incremental   |               | Cost / Eff | ICER    |
|-----------------------|----------|-------------|--------|---------------|---------------|------------|---------|
| <b>Hepatitis rate</b> | Strategy | Cost        | Cost   | Effectiveness | Effectiveness |            |         |
| 0.0177                | IGRA+TST | £77.12      | 0      | 19.07609      | 0             | 4.04       | 0       |
| 0.0354                | IGRA+TST | £77.73      | 0      | 19.07516      | 0             | 4.08       | 0       |
| 0.0531                | IGRA+TST | £78.35      | 0      | 19.07424      | 0             | 4.11       | 0       |
| 0.0708                | IGRA+TST | £78.96      | 0      | 19.07331      | 0             | 4.14       | 0       |
| 0.0885                | IGRA+TST | £79.58      | 0      | 19.07238      | 0             | 4.17       | 0       |
| 0.1062                | IGRA+TST | £80.19      | 0      | 19.07145      | 0             | 4.20       | 0       |
| 0.1239                | IGRA+TST | £80.81      | 0      | 19.07052      | 0             | 4.24       | 0       |
| 0.1416                | IGRA+TST | £81.42      | 0      | 19.0696       | 0             | 4.27       | 0       |
| 0.1593                | IGRA+TST | £82.04      | 0      | 19.06867      | 0             | 4.30       | 0       |
| 0.177                 | IGRA+TST | £82.65      | 0      | 19.06774      | 0             | 4.33       | 0       |
| 0.0177                | IGRA     | £97.85      | £20.73 | 19.07715      | 0.00106       | 5.13       | £19,545 |
| 0.0354                | IGRA     | £98.46      | £20.73 | 19.07623      | 0.00106       | 5.16       | £19,515 |
| 0.0531                | IGRA     | £99.08      | £20.73 | 19.0753       | 0.00106       | 5.19       | £19,485 |
| 0.0708                | IGRA     | £99.69      | £20.73 | 19.07437      | 0.00107       | 5.23       | £19,455 |
| 0.0885                | IGRA     | £100.31     | £20.73 | 19.07345      | 0.00107       | 5.26       | £19,425 |
| 0.1062                | IGRA     | £100.92     | £20.73 | 19.07252      | 0.00107       | 5.29       | £19,396 |
| 0.1239                | IGRA     | £101.53     | £20.73 | 19.07159      | 0.00107       | 5.32       | £19,366 |
| 0.1416                | IGRA     | £102.15     | £20.73 | 19.07067      | 0.00107       | 5.36       | £19,336 |
| 0.1593                | IGRA     | £102.76     | £20.72 | 19.06974      | 0.00107       | 5.39       | £19,307 |
| 0.177                 | IGRA     | £103.38     | £20.72 | 19.06881      | 0.00108       | 5.42       | £19,277 |



Health Economic Models Inform Screening for Tuberculosis

1  
2  
3  
4  
5  
6  
7  
8  
9  
10  
11  
12  
13  
14  
15  
16  
17  
18  
19  
20  
21  
22  
23  
24  
25  
26  
27  
28  
29  
30  
31  
32  
33  
34  
35  
36  
37  
38  
39  
40  
41  
42  
43  
44  
45  
46  
47  
48  
49  
50  
51  
52  
53  
54  
55  
56  
57  
58  
59  
60

| <b>2g IGRA</b> |          | Incremental |        | Incremental   |               | Cost / Eff | ICER    |
|----------------|----------|-------------|--------|---------------|---------------|------------|---------|
| Repeat Rate    | Strategy | Cost        | Cost   | Effectiveness | Effectiveness |            |         |
| 0.015          | IGRA+TST | £76.44      | 0      | 19.07609      | 0             | 4.01       | 0       |
| 0.03           | IGRA+TST | £76.97      | 0      | 19.07609      | 0             | 4.03       | 0       |
| 0.045          | IGRA+TST | £77.49      | 0      | 19.07609      | 0             | 4.06       | 0       |
| 0.06           | IGRA+TST | £78.02      | 0      | 19.07609      | 0             | 4.09       | 0       |
| 0.075          | IGRA+TST | £78.54      | 0      | 19.07609      | 0             | 4.12       | 0       |
| 0.09           | IGRA+TST | £79.06      | 0      | 19.07609      | 0             | 4.14       | 0       |
| 0.105          | IGRA+TST | £79.59      | 0      | 19.07609      | 0             | 4.17       | 0       |
| 0.12           | IGRA+TST | £80.11      | 0      | 19.07609      | 0             | 4.20       | 0       |
| 0.135          | IGRA+TST | £80.64      | 0      | 19.07609      | 0             | 4.23       | 0       |
| 0.15           | IGRA+TST | £81.17      | 0      | 19.07609      | 0             | 4.25       | 0       |
| 0.015          | IGRA     | £96.98      | £20.53 | 19.07715      | 0.00106       | 5.08       | £19,346 |
| 0.03           | IGRA     | £97.66      | £20.69 | 19.07715      | 0.00106       | 5.12       | £19,501 |
| 0.045          | IGRA     | £98.34      | £20.85 | 19.07715      | 0.00106       | 5.15       | £19,656 |
| 0.06           | IGRA     | £99.02      | £21.00 | 19.07715      | 0.00106       | 5.19       | £19,811 |
| 0.075          | IGRA     | £99.70      | £21.16 | 19.07715      | 0.00106       | 5.23       | £19,966 |
| 0.09           | IGRA     | £100.38     | £21.32 | 19.07715      | 0.00106       | 5.26       | £20,122 |
| 0.105          | IGRA     | £101.06     | £21.47 | 19.07715      | 0.00106       | 5.30       | £20,277 |
| 0.12           | IGRA     | £101.75     | £21.63 | 19.07715      | 0.00106       | 5.33       | £20,433 |
| 0.135          | IGRA     | £102.43     | £21.79 | 19.07715      | 0.00106       | 5.37       | £20,588 |
| 0.15           | IGRA     | £103.11     | £21.94 | 19.07715      | 0.00106       | 5.40       | £20,744 |

| <b>2h TST</b> |          | Incremental |        | Incremental   |               | Cost / Eff | ICER    |
|---------------|----------|-------------|--------|---------------|---------------|------------|---------|
| Repeat Rate   | Strategy | Cost        | Cost   | Effectiveness | Effectiveness |            |         |
| 0.025         | IGRA+TST | £75.22      | 0      | 19.0759       | 0             | 3.94       | 0       |
| 0.05          | IGRA+TST | £75.54      | 0      | 19.07593      | 0             | 3.96       | 0       |
| 0.075         | IGRA+TST | £75.86      | 0      | 19.07596      | 0             | 3.98       | 0       |
| 0.1           | IGRA+TST | £76.18      | 0      | 19.07599      | 0             | 3.99       | 0       |
| 0.125         | IGRA+TST | £76.50      | 0      | 19.07603      | 0             | 4.01       | 0       |
| 0.15          | IGRA+TST | £76.81      | 0      | 19.07606      | 0             | 4.03       | 0       |
| 0.175         | IGRA+TST | £77.13      | 0      | 19.07609      | 0             | 4.04       | 0       |
| 0.2           | IGRA+TST | £77.45      | 0      | 19.07613      | 0             | 4.06       | 0       |
| 0.225         | IGRA+TST | £77.77      | 0      | 19.07616      | 0             | 4.08       | 0       |
| 0.25          | IGRA+TST | £78.09      | 0      | 19.07619      | 0             | 4.09       | 0       |
| 0.025         | IGRA     | £97.85      | £22.63 | 19.07715      | 0.00126       | 5.13       | £17,991 |
| 0.05          | IGRA     | £97.85      | £22.31 | 19.07715      | 0.00122       | 5.13       | £18,217 |
| 0.075         | IGRA     | £97.85      | £21.99 | 19.07715      | 0.00119       | 5.13       | £18,456 |
| 0.1           | IGRA     | £97.85      | £21.67 | 19.07715      | 0.00116       | 5.13       | £18,709 |
| 0.125         | IGRA     | £97.85      | £21.36 | 19.07715      | 0.00113       | 5.13       | £18,976 |
| 0.15          | IGRA     | £97.85      | £21.04 | 19.07715      | 0.00109       | 5.13       | £19,260 |
| 0.175         | IGRA     | £97.85      | £20.72 | 19.07715      | 0.00106       | 5.13       | £19,561 |
| 0.2           | IGRA     | £97.85      | £20.40 | 19.07715      | 0.00103       | 5.13       | £19,883 |
| 0.225         | IGRA     | £97.85      | £20.08 | 19.07715      | 9.90E-04      | 5.13       | £20,225 |
| 0.25          | IGRA     | £97.85      | £19.76 | 19.07715      | 9.60E-04      | 5.13       | £20,591 |

## Health Economic Models Inform Screening for Tuberculosis

1  
2 **Suppl. Table 3**  
3 **TST, IGRA Costs**

4 **TST £24**

| 5 <b>IGRA Cost</b> | Strategy    | Cost    | Incremental<br>Cost | Effectiveness | Incremental<br>Effectiveness | Cost / Eff | ICER    |
|--------------------|-------------|---------|---------------------|---------------|------------------------------|------------|---------|
| 6                  | 45 IGRA+TST | £86.60  | 0                   | 19.07609      | 0                            | 4.53989    | 0       |
| 7                  | 55 IGRA+TST | £90.97  | 0                   | 19.07609      | 0                            | 4.76904    | 0       |
| 8                  | 65 IGRA+TST | £95.35  | 0                   | 19.07609      | 0                            | 4.9982     | 0       |
| 9                  | 75 IGRA+TST | £99.72  | 0                   | 19.07609      | 0                            | 5.22735    | 0       |
| 10                 | 85 IGRA+TST | £104.09 | 0                   | 19.07609      | 0                            | 5.4565     | 0       |
| 11                 | 95 IGRA+TST | £108.46 | 0                   | 19.07609      | 0                            | 5.68565    | 0       |
| 12                 | 45 IGRA     | £98.08  | £11.47              | 19.07715      | 0.00106                      | 5.14114    | £10,818 |
| 13                 | 55 IGRA     | £108.42 | £17.45              | 19.07715      | 0.00106                      | 5.68331    | £16,447 |
| 14                 | 65 IGRA     | £118.76 | £23.42              | 19.07715      | 0.00106                      | 6.22547    | £22,077 |
| 15                 | 75 IGRA     | £129.11 | £29.39              | 19.07715      | 0.00106                      | 6.76764    | £27,706 |
| 16                 | 85 IGRA     | £139.45 | £35.36              | 19.07715      | 0.00106                      | 7.30981    | £33,336 |
| 17                 | 95 IGRA     | £149.79 | £41.33              | 19.07715      | 0.00106                      | 7.85197    | £38,965 |

18  
19 **TST £36**

| 20 <b>IGRA Cost</b> | Strategy    | Cost    | Incremental<br>Cost | Effectiveness | Incremental<br>Effectiveness | Cost / Eff | ICER    |
|---------------------|-------------|---------|---------------------|---------------|------------------------------|------------|---------|
| 21                  | 45 IGRA+TST | £100.69 | £2.61               | 19.07609      | -0.00106                     | 5.27822    | -£2,460 |
| 22                  | 55 IGRA+TST | £105.06 | 0                   | 19.07609      | 0                            | 5.50737    | 0       |
| 23                  | 65 IGRA+TST | £109.43 | 0                   | 19.07609      | 0                            | 5.73652    | 0       |
| 24                  | 75 IGRA+TST | £113.80 | 0                   | 19.07609      | 0                            | 5.96567    | 0       |
| 25                  | 85 IGRA+TST | £118.17 | 0                   | 19.07609      | 0                            | 6.19483    | 0       |
| 26                  | 95 IGRA+TST | £122.54 | 0                   | 19.07609      | 0                            | 6.42398    | 0       |
| 27                  | 45 IGRA     | £98.08  | 0                   | 19.07715      | 0                            | 5.14114    | 0       |
| 28                  | 55 IGRA     | £108.42 | £3.36               | 19.07715      | 0.00106                      | 5.68331    | £3,170  |
| 29                  | 65 IGRA     | £118.76 | £9.33               | 19.07715      | 0.00106                      | 6.22547    | £8,799  |
| 30                  | 75 IGRA     | £129.11 | £15.31              | 19.07715      | 0.00106                      | 6.76764    | £14,429 |
| 31                  | 85 IGRA     | £139.45 | £21.28              | 19.07715      | 0.00106                      | 7.30981    | £20,058 |
| 32                  | 95 IGRA     | £149.79 | £27.25              | 19.07715      | 0.00106                      | 7.85197    | £25,688 |

33  
34  
35 **TST £48**

| 36 <b>IGRA Cost</b> | Strategy    | Cost    | Incremental<br>Cost | Effectiveness | Incremental<br>Effectiveness | Cost / Eff | ICER     |
|---------------------|-------------|---------|---------------------|---------------|------------------------------|------------|----------|
| 37                  | 45 IGRA+TST | £114.77 | £16.69              | 19.07609      | -0.00106                     | 6.01655    | -£15,738 |
| 38                  | 55 IGRA+TST | £119.14 | £10.72              | 19.07609      | -0.00106                     | 6.2457     | -£10,108 |
| 39                  | 65 IGRA+TST | £123.51 | £4.75               | 19.07609      | -0.00106                     | 6.47485    | -£4,478  |
| 40                  | 75 IGRA+TST | £127.89 | 0                   | 19.07609      | 0                            | 6.704      | 0        |
| 41                  | 85 IGRA+TST | £132.26 | 0                   | 19.07609      | 0                            | 6.93315    | 0        |
| 42                  | 95 IGRA+TST | £136.63 | 0                   | 19.07609      | 0                            | 7.1623     | 0        |
| 43                  | 45 IGRA     | £98.08  | 0                   | 19.07715      | 0                            | 5.14114    | 0        |
| 44                  | 55 IGRA     | £108.42 | 0                   | 19.07715      | 0                            | 5.68331    | 0        |
| 45                  | 65 IGRA     | £118.76 | 0                   | 19.07715      | 0                            | 6.22547    | 0        |
| 46                  | 75 IGRA     | £129.11 | £1.22               | 19.07715      | 0.00106                      | 6.76764    | £1,151   |
| 47                  | 85 IGRA     | £139.45 | £7.19               | 19.07715      | 0.00106                      | 7.30981    | £6,781   |
| 48                  | 95 IGRA     | £149.79 | £13.16              | 19.07715      | 0.00106                      | 7.85197    | £12,410  |

49  
50  
51  
52  
53  
54  
55  
56  
57  
58  
59  
60

## Health Economic Models Inform Screening for Tuberculosis

**Suppl. Table 4**  
**Market Costs Model**  
**Sensitivity Analysis**

| IGRA Specificity | Strategy | Incremental |        | Incremental   |               | Cost / Eff | ICER    |
|------------------|----------|-------------|--------|---------------|---------------|------------|---------|
|                  |          | Cost        | Cost   | Effectiveness | Effectiveness |            |         |
| 0.9              | IGRA+TST | £135.91     | 0      | 19.07479      | 0             | 7.12       | 0       |
| 0.91             | IGRA+TST | £135.27     | 0      | 19.07495      | 0             | 7.09       | 0       |
| 0.92             | IGRA+TST | £134.64     | 0      | 19.07511      | 0             | 7.06       | 0       |
| 0.93             | IGRA+TST | £134.01     | 0      | 19.07528      | 0             | 7.03       | 0       |
| 0.94             | IGRA+TST | £133.38     | 0      | 19.07544      | 0             | 6.99       | 0       |
| 0.95             | IGRA+TST | £132.75     | 0      | 19.07561      | 0             | 6.96       | 0       |
| 0.96             | IGRA+TST | £132.13     | 0      | 19.07577      | 0             | 6.93       | 0       |
| 0.97             | IGRA+TST | £131.52     | 0      | 19.07593      | 0             | 6.89       | 0       |
| 0.98             | IGRA+TST | £130.92     | 0      | 19.07609      | 0             | 6.86       | 0       |
| 0.99             | IGRA+TST | £130.34     | 0      | 19.07625      | 0             | 6.83       | 0       |
| 0.9              | IGRA     | £209.83     | £73.92 | 19.07583      | 0.00105       | 11.00      | £70,657 |
| 0.91             | IGRA     | £201.65     | £66.38 | 19.07600      | 0.00105       | 10.57      | £63,236 |
| 0.92             | IGRA     | £193.48     | £58.84 | 19.07617      | 0.00105       | 10.14      | £55,882 |
| 0.93             | IGRA     | £185.31     | £51.30 | 19.07633      | 0.00106       | 9.71       | £48,591 |
| 0.94             | IGRA     | £177.15     | £43.77 | 19.07650      | 0.00106       | 9.29       | £41,360 |
| 0.95             | IGRA     | £169.00     | £36.24 | 19.07667      | 0.00106       | 8.86       | £34,182 |
| 0.96             | IGRA     | £160.85     | £28.72 | 19.07683      | 0.00106       | 8.43       | £27,054 |
| 0.97             | IGRA     | £152.72     | £21.20 | 19.07699      | 0.00106       | 8.01       | £19,968 |
| 0.98             | IGRA     | £144.62     | £13.70 | 19.07715      | 0.00106       | 7.58       | £12,915 |
| 0.99             | IGRA     | £136.56     | £6.22  | 19.07731      | 0.00106       | 7.16       | £5,882  |
| TST Specificity  | Strategy | Incremental |        | Incremental   |               | Cost / Eff | ICER    |
|                  |          | Cost        | Cost   | Effectiveness | Effectiveness |            |         |
| 0.46             | IGRA+TST | £142.80     | 0      | 19.07601      | 0             | 7.49       | 0       |
| 0.49             | IGRA+TST | £140.06     | 0      | 19.07603      | 0             | 7.34       | 0       |
| 0.52             | IGRA+TST | £137.32     | 0      | 19.07605      | 0             | 7.20       | 0       |
| 0.55             | IGRA+TST | £134.58     | 0      | 19.07607      | 0             | 7.05       | 0       |
| 0.58             | IGRA+TST | £131.84     | 0      | 19.07609      | 0             | 6.91       | 0       |
| 0.61             | IGRA+TST | £129.09     | 0      | 19.07611      | 0             | 6.77       | 0       |
| 0.64             | IGRA+TST | £126.35     | 0      | 19.07613      | 0             | 6.62       | 0       |
| 0.67             | IGRA+TST | £123.61     | 0      | 19.07614      | 0             | 6.48       | 0       |
| 0.7              | IGRA+TST | £120.87     | 0      | 19.07616      | 0             | 6.34       | 0       |
| 0.73             | IGRA+TST | £118.13     | 0      | 19.07618      | 0             | 6.19       | 0       |
| 0.46             | IGRA     | £144.49     | £1.69  | 19.07717      | 0.00116       | 7.57       | £1,455  |
| 0.49             | IGRA     | £144.51     | £4.45  | 19.07717      | 0.00114       | 7.58       | £3,915  |
| 0.52             | IGRA     | £144.54     | £7.22  | 19.07716      | 0.00112       | 7.58       | £6,478  |
| 0.55             | IGRA     | £144.57     | £10.00 | 19.07716      | 0.00109       | 7.58       | £9,153  |
| 0.58             | IGRA     | £144.61     | £12.77 | 19.07715      | 0.00107       | 7.58       | £11,952 |
| 0.61             | IGRA     | £144.65     | £15.55 | 19.07715      | 0.00104       | 7.58       | £14,889 |
| 0.64             | IGRA     | £144.70     | £18.34 | 19.07715      | 0.00102       | 7.58       | £17,981 |
| 0.67             | IGRA     | £144.75     | £21.14 | 19.07714      | 0.00099       | 7.59       | £21,250 |
| 0.7              | IGRA     | £144.82     | £23.94 | 19.07713      | 0.00097       | 7.59       | £24,728 |
| 0.73             | IGRA     | £144.90     | £26.76 | 19.07712      | 0.00094       | 7.60       | £28,455 |

## Health Economic Models Inform Screening for Tuberculosis

1  
2  
3  
4  
5  
6  
7  
8  
9  
10  
11  
12  
13  
14  
15  
16  
17  
18  
19  
20  
21  
22  
23  
24  
25  
26  
27  
28  
29  
30  
31  
32  
33  
34  
35  
36  
37  
38  
39  
40  
41  
42  
43  
44  
45  
46  
47  
48  
49  
50  
51  
52  
53  
54  
55  
56  
57  
58  
59  
60

| Treatment        | Costs           | Incremental |        | Incremental   |               | Cost / Eff | ICER    |
|------------------|-----------------|-------------|--------|---------------|---------------|------------|---------|
|                  |                 | Cost        | Cost   | Effectiveness | Effectiveness |            |         |
| <b>LTBI</b>      | Strategy        |             |        |               |               |            |         |
|                  | £405 IGRA+TST   | £117.92     | 0      | 19.07609      | 0             | 6.18       | 0       |
|                  | £810 IGRA+TST   | £130.95     | 0      | 19.07609      | 0             | 6.86       | 0       |
|                  | £1,215 IGRA+TST | £143.99     | 0      | 19.07609      | 0             | 7.55       | 0       |
|                  | £1,620 IGRA+TST | £157.02     | 0      | 19.07609      | 0             | 8.23       | 0       |
|                  | £405 IGRA       | £124.12     | £6.20  | 19.07715      | 0.00106       | 6.51       | £5,846  |
|                  | £810 IGRA       | £144.67     | £13.72 | 19.07715      | 0.00106       | 7.58       | £12,932 |
|                  | £1,215 IGRA     | £165.22     | £21.24 | 19.07715      | 0.00106       | 8.66       | £20,018 |
|                  | £1,620 IGRA     | £185.77     | £28.75 | 19.07715      | 0.00106       | 9.74       | £27,105 |
|                  |                 |             |        |               |               |            |         |
|                  |                 |             |        |               |               |            |         |
| <b>TB</b>        | Strategy        |             |        |               |               |            |         |
|                  | £2,192 IGRA+TST | £125.58     | 0      | 19.07609      | 0             | 6.58       | 0       |
|                  | £4,384 IGRA+TST | £130.92     | 0      | 19.07609      | 0             | 6.86       | 0       |
|                  | £6,576 IGRA+TST | £136.26     | 0      | 19.07609      | 0             | 7.14       | 0       |
|                  | £8,768 IGRA+TST | £141.61     | 0      | 19.07609      | 0             | 7.42       | 0       |
|                  | £2,192 IGRA     | £140.40     | £14.82 | 19.07715      | 0.00106       | 7.36       | £13,972 |
|                  | £4,384 IGRA     | £144.62     | £13.70 | 19.07715      | 0.00106       | 7.58       | £12,915 |
|                  | £6,576 IGRA     | £148.84     | £12.58 | 19.07715      | 0.00106       | 7.80       | £11,858 |
|                  | £8,768 IGRA     | £153.06     | £11.46 | 19.07715      | 0.00106       | 8.02       | £10,801 |
|                  |                 |             |        |               |               |            |         |
|                  |                 |             |        |               |               |            |         |
| <b>Hepatitis</b> | Strategy        |             |        |               |               |            |         |
|                  | £367 IGRA+TST   | £130.61     | 0      | 19.07609      | 0             | 6.85       | 0       |
|                  | £734 IGRA+TST   | £130.92     | 0      | 19.07609      | 0             | 6.86       | 0       |
|                  | £1,101 IGRA+TST | £131.24     | 0      | 19.07609      | 0             | 6.88       | 0       |
|                  | £1,468 IGRA+TST | £131.55     | 0      | 19.07609      | 0             | 6.90       | 0       |
|                  | £367 IGRA       | £144.31     | £13.70 | 19.07715      | 0.00106       | 7.56       | £12,915 |
|                  | £734 IGRA       | £144.62     | £13.70 | 19.07715      | 0.00106       | 7.58       | £12,915 |
|                  | £1,101 IGRA     | £144.93     | £13.70 | 19.07715      | 0.00106       | 7.60       | £12,914 |
|                  | £1,468 IGRA     | £145.25     | £13.70 | 19.07715      | 0.00106       | 7.61       | £12,914 |

## Screening of Health Care Workers for Tuberculosis: Development and Validation of a New Health Economic Model to Inform Practice

Merve Nazli Eralp<sup>1</sup>, Stefan Scholtes<sup>1</sup>, Geraldine Martell<sup>2</sup>, Robert Winter<sup>3</sup>, Andrew Robert Exley<sup>4</sup>

### Reporting Checklist after Drummond and Jefferson, BMJ Economic Evaluation Working Party, BMJ 1996; 313 : 275 :

#### STUDY DESIGN

- |                                                  |     |
|--------------------------------------------------|-----|
| (1) Research question                            | Yes |
| (2) Economic importance of the research question | Yes |
| (3) Viewpoint of the analysis                    | Yes |
| (4) Rationale for choosing the alternatives      | Yes |
| (5) The alternatives being compared              | Yes |
| (6) The form of economic evaluation              | Yes |
| (7) Justification of economic evaluation used    | Yes |

#### Data Collection

- |                                                                                                                                                |                          |
|------------------------------------------------------------------------------------------------------------------------------------------------|--------------------------|
| (8) The sources of effectiveness estimates used                                                                                                | Yes                      |
| (9) Details of the design and results of effectiveness study                                                                                   | Yes                      |
| (10) Details of the method of synthesis or meta-analysis of estimates are given (if based on an overview of a number of effectiveness studies) | Yes<br><i>referenced</i> |
| (11) The primary outcome measure(s) for the economic evaluation are clearly stated                                                             | Yes                      |
| (12) Methods to value health states and other benefits are stated                                                                              | Yes                      |
| (13) Details of the subjects from whom valuations were obtained are given                                                                      | <i>referenced</i>        |
| (14) Productivity changes (if included) are reported separately                                                                                | <i>not applicable</i>    |
| (15) The relevance of productivity changes to the study question is discussed                                                                  | <i>see discussion</i>    |
| (16) Quantities of resources are reported separately from their unit costs                                                                     | Yes                      |
| (17) Methods for the estimation of quantities and unit costs are described                                                                     | Yes                      |
| (18) Currency and price data are recorded                                                                                                      | Yes                      |
| (19) Details of currency of price adjustments for inflation or currency conversion are given                                                   | <i>No</i>                |
| (20) Details of any model used are given                                                                                                       | Yes                      |
| (21) The choice of model used and the key parameters on which it is based are justified                                                        | Yes                      |
| (21) The choice of model used and the key parameters on which it is based are justified                                                        | Yes                      |
| (22) Time horizon of costs and benefits is stated                                                                                              | Yes                      |
| (23) The discount rate(s) is stated                                                                                                            | Yes                      |
| (24) The choice of rate(s) is justified                                                                                                        | <i>standard rate</i>     |
| (25) An explanation is given if costs or benefits are not discounted                                                                           | <i>not applicable</i>    |
| (26) Details of statistical tests and confidence intervals are given for stochastic data                                                       | <i>ranges cited</i>      |
| (27) The approach to sensitivity analysis is given                                                                                             | Yes                      |
| (28) The choice of variables for sensitivity analysis is justified                                                                             | Yes                      |
| (29) The ranges over which the variables are varied are stated                                                                                 | Yes                      |
| (30) Relevant alternatives are compared                                                                                                        | Yes                      |
| (31) Incremental analysis is reported                                                                                                          | Yes                      |
| (32) Major outcomes are presented in a disaggregated as well as aggregated form                                                                | Yes                      |
| (33) The answer to the study question is given                                                                                                 | Yes                      |
| (34) Conclusions follow from the data reported                                                                                                 | Yes                      |
| (35) Conclusions are accompanied by the appropriate caveats                                                                                    | Yes                      |

Andrew Exley, on behalf of the authors



**Screening of Health Care Workers for  
Tuberculosis: Development and Validation of a New Health  
Economic Model to Inform Practice**

|                                 |                                                                                                                                                                                                                                                                                                                                                                                                                                                                                                                                  |
|---------------------------------|----------------------------------------------------------------------------------------------------------------------------------------------------------------------------------------------------------------------------------------------------------------------------------------------------------------------------------------------------------------------------------------------------------------------------------------------------------------------------------------------------------------------------------|
| Journal:                        | <i>BMJ Open</i>                                                                                                                                                                                                                                                                                                                                                                                                                                                                                                                  |
| Manuscript ID:                  | bmjopen-2011-000630.R1                                                                                                                                                                                                                                                                                                                                                                                                                                                                                                           |
| Article Type:                   | Research                                                                                                                                                                                                                                                                                                                                                                                                                                                                                                                         |
| Date Submitted by the Author:   | 04-Jan-2012                                                                                                                                                                                                                                                                                                                                                                                                                                                                                                                      |
| Complete List of Authors:       | Eralp, Merve; University of Cambridge, Centre for Health Leadership and Enterprise, Judge Business School<br>Scholtes, Stefan; University of Cambridge, Centre for Health Leadership and Enterprise, Judge Business School<br>Martell, Geraldine; Cambridge University Hospitals, Cambridge Centre for Occupational Health<br>Winter, Robert; Cambridge University Health Partners, Academic Health Science System<br>Exley, Andrew; Papworth Hospital NHS Foundation Trust, Pathology;<br>Cambridge University Health Partners, |
| <b>Primary Subject Heading</b>: | Health economics                                                                                                                                                                                                                                                                                                                                                                                                                                                                                                                 |
| Secondary Subject Heading:      | Infectious diseases, Diagnostics, Patient-centred medicine, Immunology                                                                                                                                                                                                                                                                                                                                                                                                                                                           |
| Keywords:                       | HEALTH ECONOMICS, Tuberculosis < INFECTIOUS DISEASES, IMMUNOLOGY                                                                                                                                                                                                                                                                                                                                                                                                                                                                 |
|                                 |                                                                                                                                                                                                                                                                                                                                                                                                                                                                                                                                  |

SCHOLARONE™  
Manuscripts

1  
2  
3 **Screening of Health Care Workers for Tuberculosis: Development and Validation of a**  
4 **New Health Economic Model to Inform Practice**  
5  
6  
7  
8  
9

10  
11 **Merve Nazli Eralp<sup>1</sup>, Stefan Scholtes<sup>1</sup>, Geraldine Martell<sup>2</sup>, Robert Winter<sup>3</sup>, Andrew**  
12 **Robert Exley<sup>4</sup>**  
13  
14

15  
16  
17 <sup>1</sup> **Centre for Health Leadership and Enterprise, Judge Business School, University of**  
18 **Cambridge**  
19

20  
21 <sup>2</sup> **Cambridge Centre for Occupational Health, Cambridge University Hospitals**  
22

23 <sup>3</sup> **Academic Health Science System, Cambridge University Health Partners,**  
24

25 <sup>4</sup> **Department of Pathology, Papworth Hospital NHS Foundation Trust, Cambridge**  
26 **University Health Partners, Cambridge, U.K.**  
27  
28

29  
30  
31 **Correspondence to: Dr Andrew R Exley, Department of Pathology, Papworth Hospital**  
32 **NHS Foundation Trust, Papworth Everard, Cambridge, CB23 3RE.**  
33

34  
35 **Telephone: +44 (0)1480 364117 Fax: +44 (0)1480 364777**  
36

37 **Email: [andrew.exley@papworth.nhs.uk](mailto:andrew.exley@papworth.nhs.uk)**  
38  
39

40  
41 **Key words: Tuberculosis; delivery of health care; cost-benefit analysis;**  
42 **tuberculin test; interferon gamma**  
43  
44

45  
46  
47 **Word count: 3285**  
48

49 **Figures: two**  
50

51 **Tables: three**  
52

53 **Supplemental material: Excel files x2**  
54

55 **TreeAge Pro file available from corresponding author**  
56  
57  
58  
59  
60

## ABSTRACT

**Background:** Methods for determining cost-effectiveness of different treatments are well established, unlike appraisal of non-drug interventions, including novel diagnostics and biomarkers

**Objective:** We develop and validate a new health economic model by comparing cost-effectiveness of tuberculin skin test, TST; blood test, IGRA; and TST followed by IGRA in conditional sequence, in screening health care workers for latent or active TB.

**Design:** We focus on healthy life years gained as the benefit metric, rather than quality adjusted life years (QALYs) given limited data to estimate quality-adjustments of life years with TB and complications of treatment, like hepatitis. Healthy life years gained refers to the number of TB or hepatitis cases avoided, and the increase in life expectancy. We incorporate disease and test parameters informed by systematic meta-analyses and clinical practice. Health and economic outcomes of each strategy are modelled as a decision tree in Markov chains, representing different health states informed by epidemiology. Cost and effectiveness values are generated as the individual is cycled through 20 years of the model. Key parameters undergo one-way and Monte Carlo probabilistic sensitivity analyses.

**Setting:** Screening health care workers in secondary and tertiary care.

**Results:** IGRA is the most effective strategy, with incremental costs per healthy life year gained of £10,614 - £20,929, base case, £8,021 - £18,348, market costs TST £45, IGRA £90, IGRA specificities of 99% - 97%; mean (5%, 95%), £12,060 (£4,137 - £38,418) by Monte Carlo analysis.

**Conclusions:** Incremental costs per healthy life year gained, a conservative estimate of benefit, are comparable to the £20,000 - £30,000 NICE band for IGRA alone, across wide differences in disease and test parameters. Health gains justify IGRA costs, even if IGRA tests cost three times TST. This health economic model offers a powerful tool for appraising non-drug interventions in the market and under development. (300 words)



1  
2  
3  
4  
5 What this paper adds  
6  
7  
8

9 1. What is already known and why this study is required  
10

- 11 • Methods for determining the cost-effectiveness of different treatments are well  
12 established unlike the appraisal of non-drug interventions including novel diagnostics  
13 and biomarkers  
14
- 15 • We develop and validate a new health economic model by comparing cost-  
16 effectiveness of tuberculin skin test, TST and / or blood test, IGRA, in screening health  
17 care workers for latent or active TB  
18
- 19 • We investigate gains in healthy life years, without TB or hepatitis, in a comprehensive  
20 model informed by epidemiology, meta-analyses and clinical practice, testing key  
21 disease and test parameters by one-way and Monte Carlo probabilistic sensitivity  
22 analyses  
23  
24  
25  
26  
27  
28  
29  
30  
31  
32

33 2. What this study adds  
34

- 35 • IGRA is the most effective strategy when screening health care workers for latent or  
36 active TB  
37
- 38 • Screening with IGRA appears cost effective since incremental costs per healthy life  
39 year gained, a conservative estimate of benefit, are at the lower end of the £20,000 to  
40 £30,000 NICE band  
41  
42  
43  
44
- 45 • These findings are robust for wide differences in disease and test parameters, even if  
46 IGRA test costs are three times TST costs suggesting this health economic model is a  
47 powerful tool for appraising non-drug interventions  
48  
49  
50  
51  
52  
53  
54  
55  
56  
57  
58  
59  
60

## ARTICLE SUMMARY

### Article focus

- Methods for determining cost-effectiveness of different treatments are well established unlike the appraisal of non-drug interventions, including novel diagnostics and biomarkers
- We develop and validate a new health economic model by comparing cost-effectiveness of tuberculin skin test, TST and / or a TB blood test, IGRA, in screening health care workers for latent or active TB
- We investigate gains in healthy life years, without TB or hepatitis, in a comprehensive model informed by epidemiology, meta-analysis and clinical practice, testing disease and test parameters by one-way and Monte Carlo probabilistic sensitivity analyses

### Key messages

- IGRA is the most effective strategy when screening health care workers for latent or active TB
- IGRA screening has an incremental cost per healthy life year gained of £10,614 - £20,929, base case, £8,021 - £18,348, market costs, TST £45, IGRA £90, IGRA specificities 99% -97%; mean (5%, 95%), £12,060 (£4,137 - £38,418) by Monte Carlo analysis

### Strengths and limitations of this study

- Screening with IGRA alone appears cost effective since incremental costs per healthy life year gained, a conservative estimate of benefit, are at the lower end of the £20,000 to £30,000 NICE band
- Neither TST nor IGRA differentiate latent from active TB, and the specificity of IGRA is inferred from studies in populations at low risk of TB
- These findings are robust for wide differences in disease and test parameters, including IGRA test costs three times TST costs, suggesting this health economic model is a powerful tool for appraising non-drug interventions in the market and under development

## INTRODUCTION

Economic evaluation is a recognised approach to optimising national health care provision within a limited budget but informed choice requires transparent analysis highlighting key assumptions and critical factors<sup>1</sup>. Methods for determining the cost-effectiveness of different treatments are well established<sup>2, 3</sup>, unlike the appraisal of non-drug interventions, including novel diagnostics and biomarkers. We develop and validate a new health economic model by focusing on whether a tuberculin skin test, TST, and / or a blood test for tuberculosis, IGRA, is more cost-effective in screening health care workers for latent or active tuberculosis, TB. The screening of health care workers for tuberculosis has economic importance given the impact of disease transmission in each case together with the large number of NHS employees at risk, 1.7 million personnel and 80,000 new employees per annum (National Health Service, 2010). We inform the health economic model by applying insight from epidemiology, meta-analysis, and clinical practice including knowledge of market costs to compare the cost-effectiveness of new technology supporting or replacing established practice. The analysis is from the NHS and societal perspective.

Established practice is for trained occupational health staff to administer a TST using cheap readily available reagents injected intradermally at an initial visit. The skin test reaction is measured at a second clinic visit 48 – 72 hours later<sup>4</sup>. The need for two visits is operationally inefficient, and the test itself is limited both by specificity and sensitivity. TST has a low specificity in subjects exposed to BCG vaccination or environmental non-tuberculous mycobacteria (NTM) and moderate sensitivity resulting in false negatives<sup>5, 6</sup>. A new technological approach requires a single clinic visit to draw a blood sample which is transferred to the laboratory for analysis in a TB specific interferon-gamma release assay, IGRA<sup>7</sup>. The approach is operationally efficient and the assay has a high specificity and sensitivity, although simple costs per test are greater than the TST. In principle the advantages of old and new might be combined using TST for all and then applying IGRA blood testing to TST positive cases to exclude false positive TST after previous exposure to

1  
2  
3 NTM including BCG immunisation. Following earlier work,<sup>8</sup> this study has focused on healthy  
4 life years gained as the benefit metric, rather than quality adjusted life years. The reason is the  
5 lack of robust data to estimate quality-adjustments of life years with TB and complications of  
6 treatment such as hepatitis. Health life years gained refers to the number of TB or hepatitis  
7 cases avoided, and the associated increase in life expectancy.  
8  
9  
10  
11  
12

13  
14  
15 This study adds to the literature<sup>9, 8, 10, 11</sup> in four key areas by incorporating:  
16

- 17 1. Healthy life years to avoid the assumptions inherent in estimating QALYs
- 18 2. Key disease parameters in a comprehensive model of all relevant health states  
19 informed by epidemiology including  
20  
21 i. The impact of LTBI Tuberculosis treatment side effects<sup>12</sup>  
22  
23 ii. The higher relapse rate of active TB within the first three years of treatment in  
24 comparison to the years thereafter<sup>13</sup>  
25  
26 3. Key test parameters relevant to clinical practice including  
27  
28 i. The inability of screening tests to differentiate between active and latent TB<sup>6</sup>  
29  
30 ii. The sensitivity and specificity of IGRA and TST independently of each other  
31  
32 iii. Operational inefficiencies of TST prompting repeat testing<sup>14</sup>  
33  
34 4. And we provide a powerful methodology for appraising the cost-effectiveness of non-  
35 drug interventions to inform health care policy, including sensitivity analyses of key  
36 parameters  
37  
38  
39  
40  
41  
42  
43  
44

## 45 METHODS

46  
47 The health and economic outcomes of the three alternatives testing strategies are modelled  
48 as a decision tree, representing the health outcomes of each of the strategies as Markov  
49 chains over twenty years. The model incorporates economic, medical, epidemiological and  
50 operational factors in the analysis. This approach lends itself to the clinical setting where the  
51 risks are continuous over time, key events may be repeated, and operational factors may  
52 interact with other key parameters to influence the base case result.  
53  
54  
55  
56  
57  
58  
59  
60

## Data collection

The test, population, and outcome characteristics (**table 1**) include data from the meta-analyses by Menzies 2007<sup>15</sup> and Pai 2008<sup>5</sup>. In the absence of a gold standard for latent tuberculosis infection, LTBI, active TB is used as a surrogate to determine assay sensitivity<sup>15</sup>. Specificity for LTBI is derived by testing populations at low risk of TB<sup>5, 16, 17</sup> to determine the rate of false positives. The analysis is guided by our clinical and market experience with the T-Spot TB test, applying an IGRA specificity of 98%<sup>17</sup> for the base case. We then examine the impact of IGRA specificity in the sensitivity analyses of the cost-effectiveness model. The operational characteristics of the three alternative approaches include repeat test rates due to test failure and failure to attend for skin test reading. Direct and indirect costs are shown (**table 2**) drawing on data supplied by NICE (see *appendix 6*)<sup>18</sup>, the Cambridge TB service, and the NHS National tariff 2010<sup>19</sup> with costs adjusted to the 2010-2011 financial year (**suppl. table 1**). The impact of regional or national differences in disease parameters and costs are examined in one-way sensitivity analyses. The impact of uncertainty within multiple parameters is then examined using Monte Carlo probabilistic sensitivity analysis.

## Model construction

We built a decision analysis model, which incorporates the health outcomes as Markov chains over twenty years, to analyze three different diagnostic approaches to LTBI. This model only considers the initial screening for newly hired personnel; the annual testing is beyond the scope of this model. The model is coded and composed using the decision analysis software TreeAge Pro Suite 2009, 2011. The states of the Markov chains represent the health conditions of the individuals; following a LTBI diagnosis test and possible interventions. Each Markov state length is one year. The decision is made at the first node of the decision tree between three diagnosis options: TST, IGRA, and a combined sequential testing strategy. The alternatives are assessed according to their cost and effectiveness values over twenty years; in which the costs are direct and indirect monetary costs and their effectiveness is measured

by total number of healthy years. The Markov chain is implemented through 20 years, related cost and effectiveness values due to different health states are recorded as the individual is cycled through the model. All future costs are discounted at 5% per year.

**Table 1: Base Case Data for Test, Population and Outcomes Parameters**

| Parameter                                 | Base-case values  | Range Tested     | Reference                           |
|-------------------------------------------|-------------------|------------------|-------------------------------------|
| <b>1. Test characteristics</b>            |                   |                  |                                     |
| Tuberculin skin test (TST)                |                   |                  |                                     |
| Specificity                               | 0.66              | 0.46 – 0.86      | 15                                  |
| Sensitivity                               | 0.70              | 0.65 – 0.74      | 15                                  |
| Probability a second TST is placed        | 0.1737            | 0.025 – 0.25 *   | 14                                  |
| TB specific IFNgamma release assay (IGRA) |                   |                  |                                     |
| Specificity                               | 0.98              | 0.90 – 0.99      | 17                                  |
| Sensitivity                               | 0.90              | 0.82 – 0.98      | 5                                   |
| Probability a second IGRA is required     | 0.0343            | 0.015 – 0.15 *   | 14                                  |
| <b>2. Population characteristics</b>      |                   |                  |                                     |
| Age range                                 | 20 – 30           |                  |                                     |
| Occupation                                | Healthcare worker |                  |                                     |
| BCG vaccination rates                     | 52.8%             |                  | 20                                  |
| Nationality of majority                   | English           |                  |                                     |
| Prevalence of LTBI                        | 0.035             | 0.035 – 0.35 *   | 20                                  |
| Prevalence of TB                          | 0.0001            | 0.0001 – 0.001 * | 21                                  |
| Probability of all causes of death        | 0.0045            | 0.0045 – 0.045 * | Office for National Statistics 2008 |
| <b>3. Probability of Outcomes</b>         |                   |                  |                                     |
| Efficacy of LTBI treatment                | 0.65              |                  | 22                                  |
| Risk of hepatitis caused by treatment     | 0.0177            | 0.0177 – 0.177 * | 12                                  |
| Risk of activation of LTBI                | 0.01              |                  | 6                                   |
| Probability of relapse of TB              | 0.0315            | 0.0315 – 0.315 * | 13                                  |
| Probability of death due to TB            | 0.018             | 0.018 – 0.18 *   | 21                                  |
| Probability of death due to hepatitis     | 0                 |                  | Assumption                          |

#### Key

\* Ten-fold range tested in sensitivity analyses to highlight potential impact on incremental cost per healthy life year gained

Table 2: Costs

| Parameter                          | Base-case values                                                      | Range tested  |
|------------------------------------|-----------------------------------------------------------------------|---------------|
| <b>4. Cost of Interventions</b>    |                                                                       |               |
|                                    | <b>NICE<sup>18</sup></b>                                              |               |
| TST                                | £16                                                                   | £16 - £64     |
| IGRA                               | £44.78                                                                | £30 - £120    |
| Chest radiograph (CXR)             | £28                                                                   |               |
|                                    | <b>Cambridge TB Service 2010<br/>NHS National Tariff<sup>19</sup></b> |               |
| TB Treatment                       | £1,637                                                                | 0.5 – 2 times |
| Contact tracing                    | £426                                                                  | 0.5 – 2 times |
| LTBI Treatment                     | £647                                                                  | 0.5 – 2 times |
| Hepatitis Treatment                | £640                                                                  | 0.5 – 2 times |
| <b>5. Healthcare worker costs</b>  |                                                                       |               |
|                                    | <b>Cambridge TB Service 2010<br/>NHS Pay 2/2010<sup>23</sup></b>      |               |
| Time to attend for TB treatment    | £662                                                                  | 0.5 – 2 times |
| Time to attend for Contact tracing | £95                                                                   | 0.5 – 2 times |
| Time to attend for LTBI treatment  | £172                                                                  | 0.5 – 2 times |
| Time for Hepatitis treatment       | £114                                                                  | 0.5 – 2 times |
| <b>6. Discount rate</b>            | 0.05                                                                  |               |

## Key

TB treatment costs are derived from the NHS National Tariff 2010-11<sup>19</sup> applied to the Cambridge TB service. Healthcare worker costs are derived from the NHS Pay Circular (AforC) 2/2010<sup>23</sup>, point 26 £30,460, plus 22% overheads £37,161 per annum, applied to the Cambridge TB service. Total model costs for TB treatment are TB treatment, plus contact tracing x5 contacts per case<sup>22</sup>, plus health care worker time costs, £4908; for LTBI, LTBI treatment plus health care worker time costs, £819; for Hepatitis, Hepatitis treatment plus health care worker time costs, £755, (**suppl. table 1**).

## Model construction

This Markov model assumes

- i. Each health state is taken as a time periods of one year, can not be left earlier and can only last longer if the return probability is greater than zero.

- 1
  - 2
  - 3
  - 4
  - 5
  - 6
  - 7
  - 8
  - 9
  - 10
  - 11
  - 12
  - 13
  - 14
  - 15
  - 16
  - 17
  - 18
  - 19
  - 20
  - 21
  - 22
  - 23
  - 24
  - 25
  - 26
  - 27
  - 28
  - 29
  - 30
  - 31
  - 32
  - 33
  - 34
  - 35
  - 36
  - 37
  - 38
  - 39
  - 40
  - 41
  - 42
  - 43
  - 44
  - 45
  - 46
  - 47
  - 48
  - 49
  - 50
  - 51
  - 52
  - 53
  - 54
  - 55
  - 56
  - 57
  - 58
  - 59
  - 60
- ii. All patients with positive results for LTBI accept treatment, consistent with conditions of employment in the NHS. The impact of limited compliance is allowed for within the efficacy of LTBI treatment <sup>22</sup>.
  - iii. Standard Isoniazid and Rifampicin treatment for LTBI lasts three months and all treatments are completed.
  - iv. Diagnostic tests are repeated once only as required to achieve a result
  - v. The repeat rate for diagnostic tests is further addressed in the sensitivity analyses
  - vi. The probability that LTBI generates a positive result is assumed to be the same as the probability that active TB generates a positive result, as there is no gold standard for LTBI
  - vii. The risk of active TB in cases with false negative results is proportional to the prevalence rates of latent and active TB
  - viii. The result of the second test is independent of the first in two stage testing
  - ix. The effects of TB and Hepatitis are the simple sum, rather than synergistic
  - x. All cases with positive TST or IGRA will have a CXR that identifies all cases of active TB. All positive CXRs are active TB
  - xi. The relapse rate of TB is higher than the prevalence rate in the general population for the first three years after recovery <sup>13</sup>
  - xii. The probability of continuing to have TB after standard TB treatment is the probability of relapse
  - xiii. All TB is diagnosed and treated on time. The effect of late diagnosis of latent or active TB in cases with false negative results is neglected.
  - xiv. An equal number of males and females make up new NHS healthcare workers
  - xv. Death of an employee has no monetary cost for NHS.
  - xvi. Transmission of TB to the community is modeled as a constant monetary cost for contact tracing, including screening the close contacts of the patient, and their treatment in the case of positive Tuberculosis findings.
  - xvii. All employees are employed for 20 years



The comprehensive decision tree consists of 985 nodes including three similar sub-trees with different probability and cost parameters (**figure 1**). The initial analysis was then subjected to one-way sensitivity analyses applied to key parameters including IGRA sensitivity and specificity; prevalence rates of TB and LTBI, all causes death rates; test repetition rates; market rates for TST and IGRA tests; and treatment costs for TB, LTBI, and hepatitis. We tested the impact of variation in multiple parameters by first generating triangular distributions using minimum, mode or peak, and maximum values for key parameters<sup>24</sup>. Probabilistic sensitivity analysis was then carried out by Monte Carlo simulation using 100, 000 iterations to estimate the total impact of uncertainty on the model, TreeAge Pro 2011.

## RESULTS

Base case analysis indicates the incremental cost of IGRA alone is offset by the increased effectiveness of this approach over the two stage sequential approach of TST followed by IGRA for positive TST results (**table 3a**). IGRA is the most effective strategy with an incremental effectiveness of 0.0015 and an incremental cost-effectiveness ratio, ICER, of £15,757 per healthy life year gained. The strategy of TST alone is clearly inferior by all criteria. We therefore focused on further analysis of parameters affecting the relative efficacy of TST + IGRA versus IGRA alone.

**Table 3 Incremental Costs Per Healthy Life Year Gained (ICER) of IGRA or TST**

| Strategy               | Cost    | Incremental Cost | Effectiveness | Incremental Effectiveness | Cost / Effectiveness | ICER                    |
|------------------------|---------|------------------|---------------|---------------------------|----------------------|-------------------------|
| <b>a. Base Case</b>    |         |                  |               |                           |                      |                         |
| IGRA+TST               | £76.60  | £0.00            | 19.07569      | 0                         | 4.02                 | £0                      |
| IGRA                   | £99.52  | £22.92           | 19.07714      | 0.001455                  | 5.22                 | £15,757                 |
| TST                    | £333.42 | £233.90          | 19.07088      | -0.00626                  | 17.48                | -£37,358<br>(Dominated) |
| <b>b. Market Costs</b> |         |                  |               |                           |                      |                         |
| IGRA+TST               | £127.13 | £0.00            | 19.0757       | 0                         | 6.66                 | £0                      |
| IGRA                   | £146.29 | £19.16           | 19.0771       | 0.00145                   | 7.67                 | £13,173                 |
| TST                    | £367.45 | £221.16          | 19.0709       | -0.0063                   | 19.27                | -£35,324<br>(Dominated) |

Base case, TST £16, IGRA £45; market costs TST £45, IGRA £90.

### Sensitivity analyses of disease and test parameters

Sensitivity analysis of the base case model indicates that the ICER for IGRA ranges from £20,929 to £10,614 per healthy life year gained for test specificities of 97% - 99% (**figure 2a-c, suppl. table 2**). Assay sensitivity has a much smaller impact on the ICER (**figure 2d**). The superior cost-effectiveness of IGRA was not threatened when base case values were inflated ten fold for all cause death rates; TB death rates; prevalence of LTBI or TB; relapse rates and hepatitis rates (**figure 2e, suppl. table 3a-f**).

TST repeat rates were estimated using the 17.4% rate of failure to achieve a TST result in a UK study of routine practice<sup>14</sup>. This compares with 53%, 35/66, of medical students who failed to attend their first Mantoux appointment<sup>25</sup> and a 12% failure rate to read the 1<sup>st</sup> TST<sup>11</sup>. Varying the IGRA repeat rate from 1.5% to 15% or TST repeat rate from 2.5% to 25% had little impact on the ICER which increased from £15,573 to £16,860 and £14,242 to £16,776 per healthy life year gained respectively (**suppl. table 3g, h**).

The cost of TST testing was investigated by eliciting costs from five private medical service providers, median £65 per test, range £45 to £75, and by using estimated itemized costs from Cambridge Occupational Health (**suppl, table 1.V**), total cost £48.53. We used £45 as a market cost for TST and tested the impact of test costs on ICER. Market costs for TST significantly enhance the ICER for IGRA alone across a range of IGRA costs (**figure 2f, suppl. table 4**). In particular, the market standard test costs of £45 per TST and £90 per IGRA generate an ICER of £13,173 per healthy life year gained (**table 3b**). A threshold value of £30,000 per healthy life year gained is still achieved when IGRA test costs are three-times TST test costs.

Examining the impact of assay specificity and sensitivity, this market standard model generates a range of £18,348 to £8,021 per healthy life year gained for an IGRA specificity of 97% - 99%. Sensitivity analysis for TST test characteristics over a range of 0.46 – 0.86 for

1  
2  
3 specificity, and 0.65 – 0.74 for sensitivity <sup>15</sup>, suggests IGRA remains the optimal strategy with  
4 costs of £354 to £31,069, and £10, 385 - £16, 484 per healthy life year gained respectively.  
5  
6  
7 **(suppl. table 5).**  
8  
9

10  
11 The calculation and apportionment of treatment costs is likely to vary between centres, but a  
12 four fold variation, 0.5 times – 2 times baseline, in treatment costs for LTBI, TB, or hepatitis is  
13 also accommodated by the market standard model **(figure 2g, suppl. table 6).**  
14  
15

16  
17 Probabilistic sensitivity analysis by Monte Carlo simulation was carried out with uncertainty in  
18 each of 12 key parameters defined as triangular distributions **(suppl. table 7)**. Mean  
19 incremental cost per healthy life year gained was £12,060, with 5% and 95% values of £4,137  
20 and £38, 418 respectively.  
21  
22  
23  
24  
25  
26  
27  
28  
29  
30

## 31 **DISCUSSION**

32  
33 The methodology for determining the cost-effectiveness of different treatments is well  
34 established <sup>2, 3, 1</sup> in contrast to the analysis of non-drug interventions. Our health economic  
35 model suggests a methodology to appraise the host of novel diagnostics <sup>7</sup> and biomarkers  
36 generated by clinical science. Healthy life years, despite being a conservative benefit metric,  
37 may be particularly useful in evaluating novel screening and monitoring tests by avoiding the  
38 assumptions inherent in generating quality adjusted life years <sup>26, 1, 8, 11, 27</sup>. This approach,  
39 allied to the use of multiple disease states supported by epidemiological data, is far more  
40 powerful than standard comparisons since the IGRA strategy will overcome a two – three fold  
41 excess of simple test costs.  
42  
43  
44  
45  
46  
47  
48  
49  
50  
51

52  
53 In our study we compare the effectiveness of the diagnostic procedures by focusing on  
54 healthy life years gained, <sup>1, 8</sup> rather than quality adjusted life years <sup>26, 11, 18</sup>. The reason is  
55 there are limited data to base estimates of quality adjusted life years for each of the health  
56  
57  
58  
59  
60

1  
2  
3 states applicable to latent or active TB and its treatment<sup>28</sup>. The additional costs of IGRA alone  
4 appear justified by the health gains at £15,757 per healthy life year gained, falling to £13,173  
5 per healthy life year when applying market costs where blood tests cost twice as much as skin  
6 tests. Our estimates are conservative in that they only take a healthy life year as a benefit (i.e.  
7 years without tuberculosis or hepatitis). Since the calculated ratio is at the lower end of the  
8 NICE band of £20,000 - £30,000, IGRA is cost-effective, even at the current NICE threshold  
9 which may or may not be conservative<sup>2, 3</sup>. These findings are supported by the probabilistic  
10 sensitivity analysis of multiple disease and test parameters. There is no validated instrument  
11 for determining quality of life with tuberculosis<sup>29</sup>, but when such data are available it is likely  
12 that additional health gains would be identified, further improving the cost/benefit ratio.  
13  
14  
15  
16  
17  
18  
19  
20  
21  
22  
23

24  
25 The health economic model is sensitive to IGRA specificity, which is derived from estimates of  
26 false positives in populations at low risk of TB<sup>30 27, 17</sup>. An IGRA specificity of 98% is  
27 conservative by current literature<sup>30 27, 17</sup> but higher than analyses potentially confounded by  
28 data from studies in populations at intermediate rather than low risk of TB<sup>5, 16, 18</sup>. Our model  
29 accommodates substantial enhancement of TST specificity greater than expected in BCG-  
30 vaccinated populations or mixed populations including non-BCG vaccinated health care  
31 workers<sup>15</sup>. The outcome may be different in non-BCG vaccinated populations with low NTM  
32 infection rates<sup>5</sup> but NTM infection is an increasing problem in adults<sup>31</sup>. Studies testing  
33 children prior to BCG immunisation have revealed false positive TST rates of 14% in SE  
34 England<sup>32</sup> and 79% in Norway<sup>33</sup>. It seems likely therefore that previous infection with NTM  
35 has a significant role in reducing the specificity of TST. The study's findings accommodate wide  
36 regional or national differences in disease parameters, although health gains are enhanced by  
37 a relative increase in the prevalence of LTBI and hampered by doubling costs for the  
38 treatment of LTBI.  
39  
40  
41  
42  
43  
44  
45  
46  
47  
48  
49  
50  
51  
52  
53  
54

55  
56 Studies including the relative risk of progression to active TB suggest additional limits to TST  
57 specificity, reviewed recently<sup>34</sup>. IGRA positive cases with LTBI are more likely to progress to  
58  
59  
60

1  
2  
3 active TB than TST positive cases. In particular, IGRA positive cases showed a 19% greater  
4 chance of progression to active TB than expected solely from the increased specificity of  
5 IGRA over TST<sup>10</sup>. This advantage would lead to further domination of TST only approaches,  
6  
7 by sequential TST then IGRA and IGRA alone strategies.  
8  
9

10  
11  
12  
13 The one-stop approach of IGRA alone has additional, operational advantages which are likely  
14 to enhance the value of this strategy. Testing at a single visit boosts compliance whilst  
15 minimising consumption of resources to achieve a test result and the risk of loss to follow up.  
16  
17 The health economic model does not include an allowance for health care workers time to  
18 attend for testing, but these staff costs would be greater when two – three visits are required  
19 for TST then IGRA further limiting cost-effectiveness of strategies incorporating TST.  
20  
21 Efficiency is enhanced by combining IGRA with other screening blood tests, although a blood  
22 sample is more invasive than TST. Blood testing may offer more flexibility than TST with  
23 blood sampling facilities widely available in primary care and hospital settings. In contrast,  
24 carrying out a TST requires registered nurses with proven competence and recent training or  
25 administration of TSTs<sup>4</sup>, which is more expensive than phlebotomy and may be limiting during  
26 peaks in demand such as in contact tracing. An IGRA strategy transfers costs from the clinic  
27 to the laboratory, where cost pressures are intense but responsive to focusing expertise and  
28 optimising staffing structures. Critical aspects of blood sampling are defined including the  
29 impact of the test population and sampling conditions on the performance characteristics of  
30 IGRA<sup>14, 35, 36, 37</sup>. An IGRA strategy also avoids the possibility of TST boosting TST  
31 responses after repeat testing<sup>6</sup> or IGRA responses if follow-up testing is delayed<sup>36</sup>. The  
32 relative merits of different IGRA tests are controversial<sup>27, 17, 5</sup> but where there is a consensus  
33 on the assay characteristics this model should allow further investigation.  
34  
35  
36  
37  
38  
39  
40  
41  
42  
43  
44  
45  
46  
47  
48  
49  
50  
51

52  
53  
54 Our study suggests health gains justify IGRA costs when screening health care workers for  
55 latent or active TB. These findings are robust for wide differences in key disease and test  
56 parameters including IGRA test costs three times TST costs, whilst maintaining cost-  
57  
58  
59  
60

1  
2  
3 effectiveness at the lower end of the £20,000 - £30,000 NICE band. We suggest this health  
4  
5 economic model incorporating healthy life years gained, epidemiology, meta-analyses and  
6  
7 clinical practice provides a powerful tool for assessing the potential impact of new technology  
8  
9 on established practice.  
10  
11  
12  
13  
14  
15  
16  
17  
18  
19  
20  
21  
22  
23  
24  
25  
26  
27  
28  
29  
30  
31  
32  
33  
34  
35  
36  
37  
38  
39  
40  
41  
42  
43  
44  
45  
46  
47  
48  
49  
50  
51  
52  
53  
54  
55  
56  
57  
58  
59  
60

For peer review only

## Figures

### Figure 1: The Decision Tree

Health and economic outcomes of TST and / or IGRA modeled as a decision tree in Markov chains representing different health states informed by epidemiology: TB, active tuberculosis; LTBI, LTBI1, latent tuberculosis, with treatment; D, Death; S, S1, healthy, with unnecessary treatment for LTBI ; H, H+TB, H+LTBI, hepatitis, and TB, or LTBI; T1, T2, T1H, T2H, transition states indicating relapse rates within three years of treatment and thereafter, with hepatitis; A – E, node points repeated as Clone A - Clone E. X, Y are probabilities,  $X = p_{LTBI} / (p_{LTBI} + p_{TB})$ ,  $Y = p_{TB} / (p_{LTBI} + p_{TB})$

### Figure 2: Impact of Wide Differences in Disease and Test Parameters on Cost-Effectiveness

**a – c** IGRA specificity versus **a** overall costs in £ Sterling, **b** cost / effectiveness, **c** ICER, incremental cost per healthy life year gained. **d – f** ICER in the base case model versus **d** IGRA sensitivity, **e** key disease parameters increased times ten, prev prevalence, **f** TST and IGRA costs. **g** ICER in the market case model versus four fold variation in treatment costs.

## Acknowledgements

We thank Mary-Jane Robinson, Nurse Manager, Cambridge Centre for Occupational Health, for sharing data prior to presentation <sup>25</sup>; Edward Mwarangu, National Institute for Health and Clinical Excellence for discussing costs during consultation prior to publication of CG117 <sup>18</sup>; Emma Harris, Nurse Specialist, University Hospitals Cambridge TB service, for help in generating treatment costs; and Victoria Stoneman, Research and Development, Papworth Hospital for critical reading of the manuscript.

## Funding

This research received no specific grant from any funding agency in the public, commercial or not-for-profit sectors

## Competing Interests

MNE has no competing interests; SS has no competing interests; GM has no competing interests; RW has no competing interests. ARE is the director of the specialist Immunology Laboratory at Papworth Hospital NHS Foundation Trust which provides a supra-regional service for interferon-gamma release assays using the T-Spot TB test (Oxford Immunotech).

## Contributor Statement

ARE & RW conceived the study. SS and MNE developed the economic model with additional clinical data from GM, ARE, RW. MNE, SS, ARE, tested and revised the economic model. All authors contributed to the interpretation of the results and approved the final version of the manuscript.

## Provenance and peer review

Not commissioned; externally peer reviewed

## Data sharing statement



1  
2  
3  
4  
5  
6  
7  
8  
9  
10  
11  
12  
13  
14  
15  
16  
17  
18  
19  
20  
21  
22  
23  
24  
25  
26  
27  
28  
29  
30  
31  
32  
33  
34  
35  
36  
37  
38  
39  
40  
41  
42  
43  
44  
45  
46  
47  
48  
49  
50  
51  
52  
53  
54  
55  
56  
57  
58  
59  
60

The economic model run on TreeAge Pro is available from the corresponding author.

For peer review only

## Reference List

- 1  
2  
3  
4  
5 (1) Trunz BB, Fine P, Dye C. Effect of BCG vaccination on childhood tuberculous  
6 meningitis and miliary tuberculosis worldwide: a meta-analysis and assessment of  
7 cost-effectiveness. *Lancet* 2006; 367(9517):1173-1180.
- 8  
9 (2) Towse A. Should NICE's threshold range for cost per QALY be raised? Yes. *BMJ*  
10 2009; 338:b181. doi: 10.1136/bmj.b181.:b181.
- 11  
12 (3) Raftery J. Should NICE's threshold range for cost per QALY be raised? No. *BMJ* 2009;  
13 338:b185. doi: 10.1136/bmj.b185.:b185.
- 14  
15 (4) NHS. Policy for Occupational Health Management of Tuberculosis. *NHS Plus* 2009.
- 16  
17 (5) Pai M, Zwerling A, Menzies D. Systematic Review: T-Cell-Based Assays for the  
18 Diagnosis of Latent Tuberculosis Infection: An Update. *Ann Intern Med* 2008;  
19 149(3):177-184.
- 20  
21 (6) Mack U, Migliori GB, Sester M, Rieder HL, Ehlers S, Goletti D et al. LTBI: latent  
22 tuberculosis infection or lasting immune responses to M. tuberculosis? A TBNET  
23 consensus statement. *Eur Respir J* 2009; 33(5):956-973.
- 24  
25 (7) Lalvani A. Diagnosing Tuberculosis Infection in the 21st Century: New Tools To Tackle  
26 an Old Enemy. *Chest* 2007; 131(6):1898-1906.
- 27  
28 (8) Diel R, Wrighton-Smith P, Zellweger JP. Cost-effectiveness of interferon- $\gamma$   
29 release assay testing for the treatment of latent tuberculosis. *Eur Respir J* 2007;  
30 30(2):321-332.
- 31  
32 (9) Diel R, Nienhaus A, Lange C, Schaberg T. Cost-optimisation of screening for latent  
33 tuberculosis in close contacts. *Eur Respir J* 2006; 28(1):35-44.
- 34  
35 (10) Diel R, Schaberg T, Loddenkemper R, Welte T, Nienhaus A. Enhanced cost-benefit  
36 analysis of strategies for LTBI screening and INH chemoprevention in Germany.  
37 *Respiratory Medicine* 2009; 103(12):1838-1853.
- 38  
39 (11) de Perio MA, Tsevat J, Roselle GA, Kralovic SM, Eckman MH. Cost-effectiveness of  
40 Interferon Gamma Release Assays vs Tuberculin Skin Tests in Health Care Workers.  
41 *Arch Intern Med* 2009; 169(2):179-187.
- 42  
43 (12) Hong Kong Chest Service, Tuberculosis Research Centre M, British Medical Research  
44 Council. A double-blind placebo-controlled clinical trial of three antituberculosis  
45 chemoprophylaxis regimens in patients with silicosis in Hong Kong. *Am Rev Respir Dis*  
46 1992; 145(1):36-41.
- 47  
48 (13) British Thoracic Society. A controlled trial of 6 months' chemotherapy in pulmonary  
49 tuberculosis. Final report: results during the 36 months after the end of chemotherapy  
50 and beyond. *Br J Dis Chest* 1984; 78(4):330-336.
- 51  
52 (14) Dosanjh DPS, Hinks TSC, Innes JA, Deeks JJ, Pasvol G, Hackforth S et al. Improved  
53 Diagnostic Evaluation of Suspected Tuberculosis in Routine Practice. *Ann Intern Med*  
54 2008; 148(5):325-336.
- 55  
56 (15) Menzies D, Pai M, Comstock G. Meta-analysis: New Tests for the Diagnosis of Latent  
57 Tuberculosis Infection: Areas of Uncertainty and Recommendations for Research. *Ann*  
58 *Intern Med* 2007; 146(5):340-354.
- 59  
60

- 1  
2  
3 (16) Lee K, Han M-K, Choi H-R, Choi C-M, Oh Y-M, Lee S-D et al. Annual Incidence of  
4 Latent Tuberculosis Infection among Newly Employed Nurses at a Tertiary Care  
5 University Hospital. *Infection Control and Hospital Epidemiology* 2009; 30(12):1218-  
6 1222.  
7  
8 (17) Diel R, Goletti D, Ferrara G, Bothamley G, Cirillo D, Kampmann B et al. Interferon-  
9 gamma release assays for the diagnosis of latent M. tuberculosis infection: A  
10 systematic review and meta-analysis. *Eur Respir J* 2011; 37(1):88-99.  
11  
12 (18) National Institute for Health and Clinical Excellence. Clinical diagnosis and  
13 management of Tuberculosis, and measures for its prevention and control. *NICE*  
14 *Clinical Guidelines* 2011; CG117:1-64.  
15  
16 (19) Department of Health. Payment by Results: National Tariff 2010-11. *Guidance* 2010;  
17 dh\_115898.xls.  
18  
19 (20) Schablon A, Beckmann G, Harling M, Diel R, Nienhaus A. Prevalence of latent  
20 tuberculosis infection among health care workers in a hospital for pulmonary diseases.  
21 *Journal of Occupational Medicine and Toxicology* 2009; 4(1):1.  
22  
23 (21) Health Protection Agency. Tuberculosis in the U.K. Annual Report on Tuberculosis  
24 Surveillance in the U.K. 2009. *HPA Reports* 2010.  
25  
26 (22) National Collaborating Centre for Chronic Conditions. Tuberculosis: Clinical diagnosis  
27 and management of tuberculosis and measures for its prevention and control. *Royal*  
28 *College of Physicians, London* 2006; ISBN 1 86016 227 0.  
29  
30 (23) NHS. Pay circular (AforC) 2/2010. *The NHS Terms and Conditions of Service*  
31 *Handbook* 2010.  
32  
33 (24) Fox MP, Lash TL, Greenland S. A method to automate probabilistic sensitivity  
34 analyses of misclassified binary variables. *Int J Epidemiol* 2005; 34(6):1370-1376.  
35  
36 (25) Martell G, Robinson M-J. Inefficiencies and delays in healthcare worker screening for  
37 Mycobacterium tuberculosis – an audit of medical student screening. *3rd HPA Pointers*  
38 *(Prevention of Occupational Infections, Treatment and Exposure Reporting Strategies*  
39 *for Healthcare Workers) Conference, London* 2010.  
40  
41 (26) Griebisch I, Coast J, Brown J. Quality-adjusted life-years lack quality in pediatric care: a  
42 critical review of published cost-utility studies in child health. *Pediatrics* 2005;  
43 115(5):e600-e614.  
44  
45 (27) Pooran A, Booth H, Miller RF, Scott G, Badri M, Huggett JF et al. Different screening  
46 strategies (single or dual) for the diagnosis of suspected latent tuberculosis: a cost  
47 effectiveness analysis. *BMC Pulm Med* 2010; 10:7.  
48  
49 (28) Miller TL, McNabb SJN, Hilsenrath P, Pasipanodya J, Weis SE. Personal and Societal  
50 Health Quality Lost to Tuberculosis. *PLoS ONE* 2009; 4(4):e5080.  
51  
52 (29) Guo N, Marra F, Marra CA. Measuring health-related quality of life in tuberculosis: a  
53 systematic review. *Health Qual Life Outcomes* 2009; 7:14.:14.  
54  
55 (30) Bienek DR, Chang CK. Evaluation of an interferon-gamma release assay, T-SPOT.TB,  
56 in a population with a low prevalence of tuberculosis. *Int J Tuberc Lung Dis* 2009;  
57 13(11):1416-1421.  
58  
59  
60

- 1  
2  
3 (31) Fowler SJ, French J, Screamon NJ, Foweraker J, Condliffe A, Haworth CS et al.  
4 Nontuberculous mycobacteria in bronchiectasis: prevalence and patient  
5 characteristics. *Eur Respir J* 2006; 28(6):1204-1210.  
6  
7 (32) Weir RE, Fine PE, Nazareth B, Floyd S, Black GF, King E et al. Interferon-gamma and  
8 skin test responses of schoolchildren in southeast England to purified protein  
9 derivatives from *Mycobacterium tuberculosis* and other species of mycobacteria. *Clin*  
10 *Exp Immunol* 2003; 134(2):285-294.  
11  
12 (33) Winje BA, Oftung F, Korsvold GE, Mannsaker T, Ly IN, Harstad I et al. School based  
13 screening for tuberculosis infection in Norway: comparison of positive tuberculin skin  
14 test with interferon-gamma release assay. *BMC Infect Dis* 2008; 8:140.:140.  
15  
16 (34) Nienhaus A, Schablon A, Costa JT, Diel R. Systematic review of cost and cost-  
17 effectiveness of different TB-screening strategies. *BMC Health Serv Res* 2011;  
18 11:247.:247.  
19  
20 (35) Ferrara G, Losi M, D'Amico R, Roversi P, Piro R, Meacci M et al. Use in routine clinical  
21 practice of two commercial blood tests for diagnosis of infection with *Mycobacterium*  
22 *tuberculosis*: a prospective study. *Lancet* 2006; 367(9519):1328-1334.  
23  
24 (36) van Zyl-Smit RN, Pai M, Pehrah K, Meldau R, Kieck J, Juritz J et al. Within-Subject  
25 Variability and Boosting of T-Cell Interferon- $\gamma$  Responses after Tuberculin Skin  
26 Testing. *Am J Respir Crit Care Med* 2009; 180(1):49-58.  
27  
28 (37) Herrera V, Yeh E, Murphy K, Parsonnet J, Banaei N. Immediate incubation reduces  
29 indeterminate results for QuantiFERON-TB Gold in-tube assay. *J Clin Microbiol* 2010;  
30 48(8):2672-2676.  
31  
32  
33  
34  
35  
36  
37  
38  
39  
40  
41  
42  
43  
44  
45  
46  
47  
48  
49  
50  
51  
52  
53  
54  
55  
56  
57  
58  
59  
60



Figure 1: The Decision Tree

Health and economic outcomes of TST and / or IGRA modeled as a decision tree in Markov chains representing different health states informed by epidemiology: TB, active tuberculosis; LTBI, LTBI1, latent tuberculosis, with treatment; D, Death; S, S1, healthy, with unnecessary treatment for LTBI ; H, H+TB, H+LTBI, hepatitis, and TB, or LTBI; T1, T2, T1H, T2H, transition states indicating relapse rates within three years of treatment and thereafter, with hepatitis; A – E, node points repeated as Clone A - Clone E. X, Y are probabilities,  $X = p_{LTBI} / (p_{LTBI} + p_{TB})$ ,  $Y = p_{TB} / (p_{LTBI} + p_{TB})$

205x161mm (300 x 300 DPI)

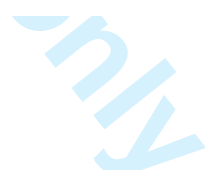

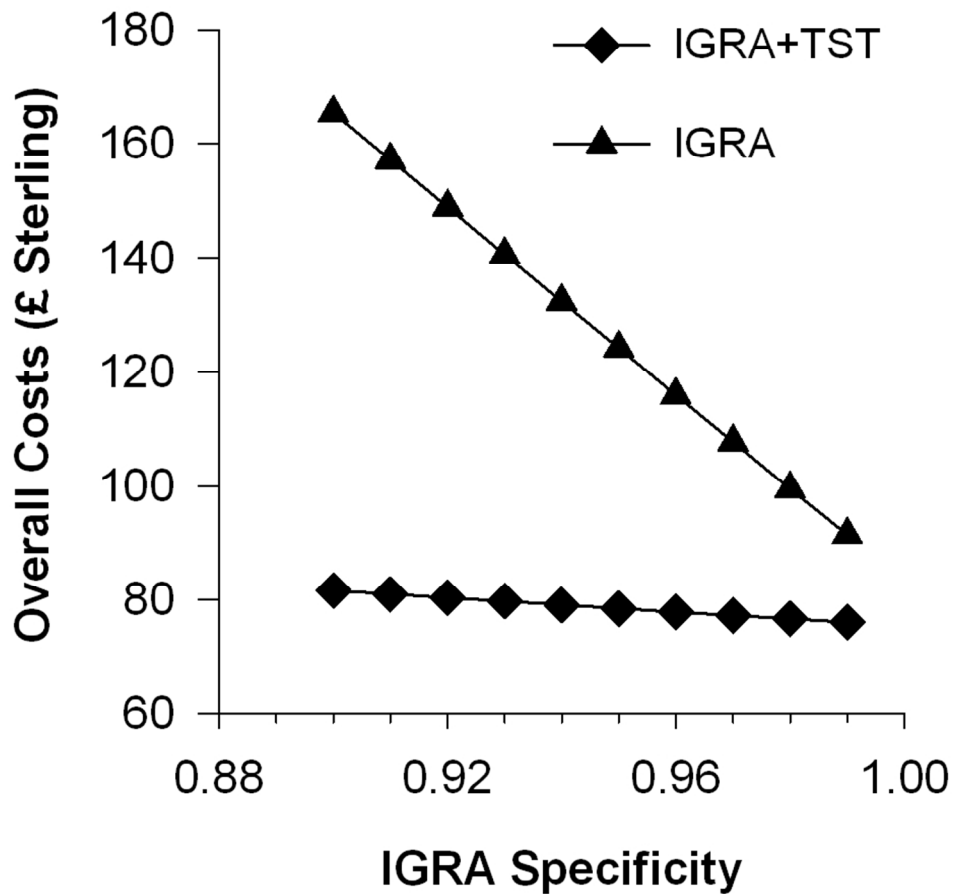

Figure 2: Impact of Wide Differences in Disease and Test Parameters on Cost-Effectiveness  
 a IGRA specificity versus Overall Costs in £ Sterling  
 83x80mm (300 x 300 DPI)

1  
2  
3  
4  
5  
6  
7  
8  
9  
10  
11  
12  
13  
14  
15  
16  
17  
18  
19  
20  
21  
22  
23  
24  
25  
26  
27  
28  
29  
30  
31  
32  
33  
34  
35  
36  
37  
38  
39  
40  
41  
42  
43  
44  
45  
46  
47  
48  
49  
50  
51  
52  
53  
54  
55  
56  
57  
58  
59  
60

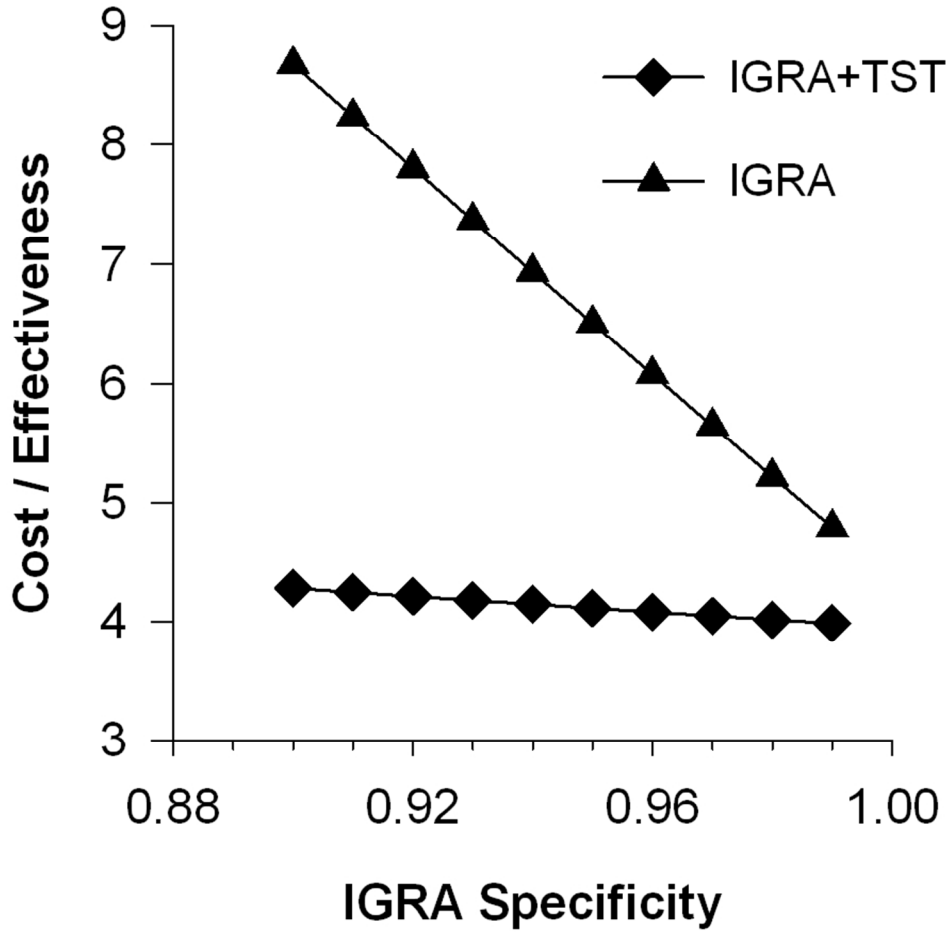

Figure 2: Impact of Wide Differences in Disease and Test Parameters on Cost-Effectiveness  
b. IGRA specificity versus Cost/Effectiveness  
79x80mm (300 x 300 DPI)

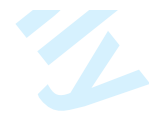

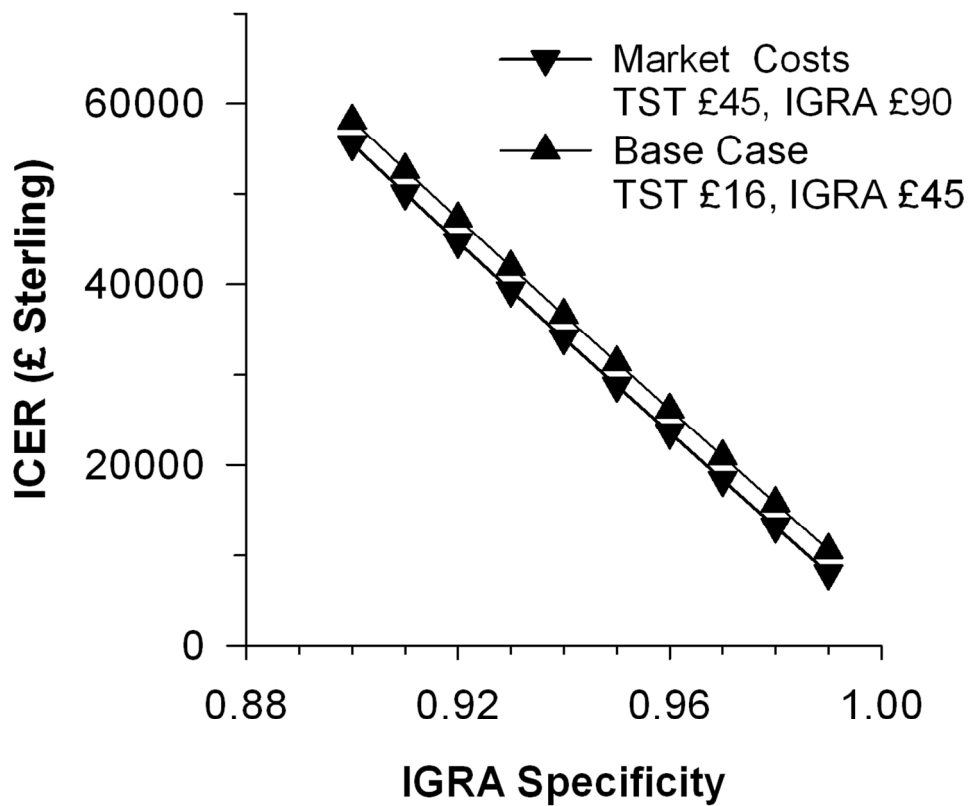

Figure 2: Impact of Wide Differences in Disease and Test Parameters on Cost-Effectiveness  
 c. IGRA Specificity versus ICER, incremental cost per healthy life year gained  
 110x95mm (300 x 300 DPI)

only

1  
2  
3  
4  
5  
6  
7  
8  
9  
10  
11  
12  
13  
14  
15  
16  
17  
18  
19  
20  
21  
22  
23  
24  
25  
26  
27  
28  
29  
30  
31  
32  
33  
34  
35  
36  
37  
38  
39  
40  
41  
42  
43  
44  
45  
46  
47  
48  
49  
50  
51  
52  
53  
54  
55  
56  
57  
58  
59  
60



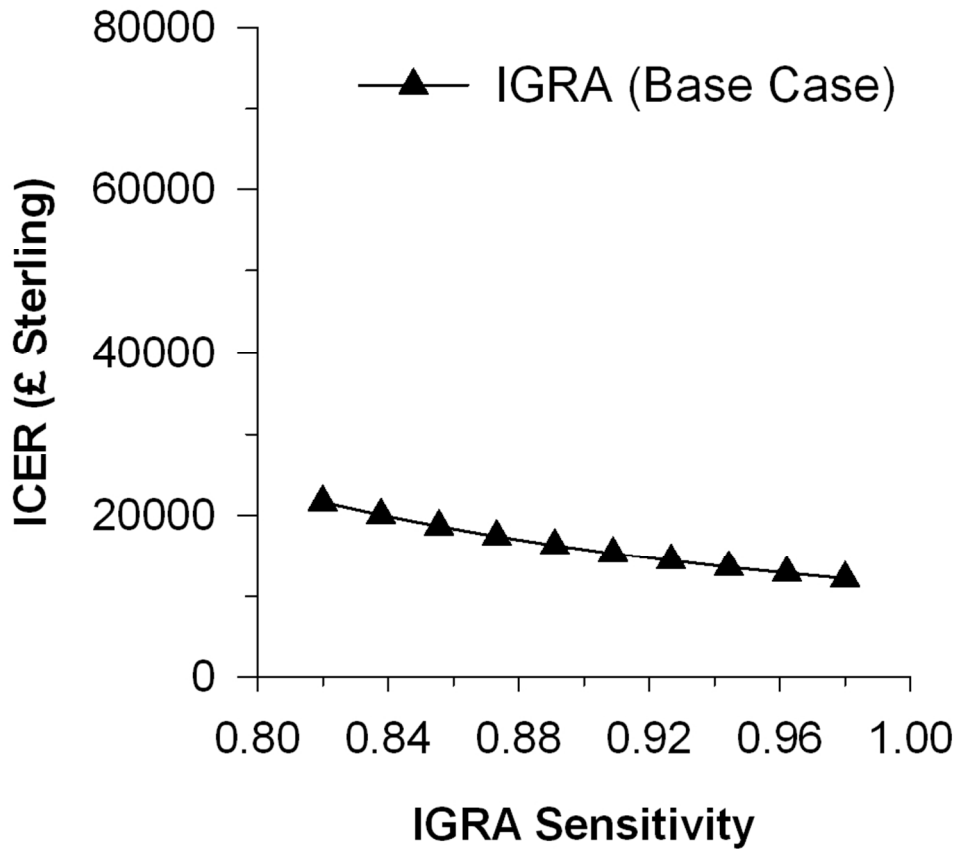

Figure 2: Impact of Wide Differences in Disease and Test Parameters on Cost-Effectiveness  
d. IGRA sensitivity versus ICER, incremental cost per healthy life year gained, in the base case model  
87x80mm (300 x 300 DPI)

only

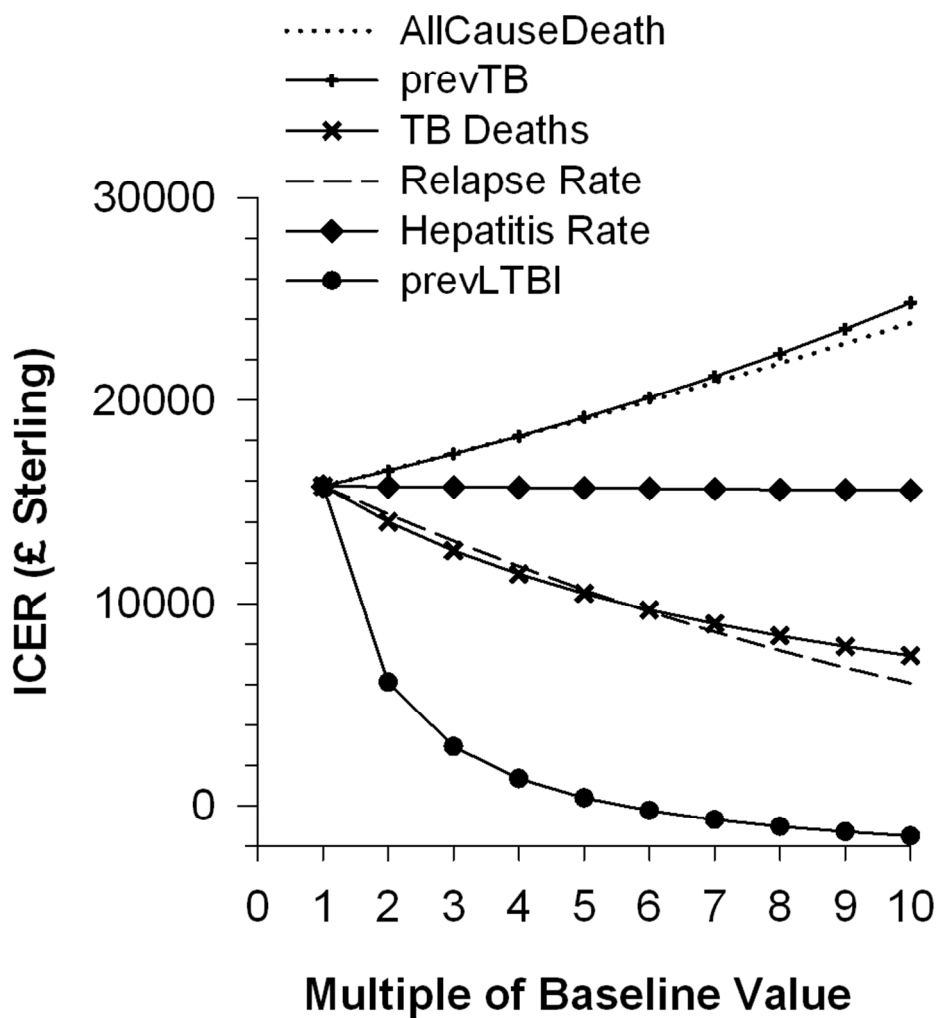

Figure 2: Impact of Wide Differences in Disease and Test Parameters on Cost-Effectiveness  
 e. ICER, incremental cost per healthy life year gained, in the base case model versus Key Disease  
 Parameters inflated ten-fold. Prev prevalence  
 87x93mm (300 x 300 DPI)

1  
2  
3  
4  
5  
6  
7  
8  
9  
10  
11  
12  
13  
14  
15  
16  
17  
18  
19  
20  
21  
22  
23  
24  
25  
26  
27  
28  
29  
30  
31  
32  
33  
34  
35  
36  
37  
38  
39  
40  
41  
42  
43  
44  
45  
46  
47  
48  
49  
50  
51  
52  
53  
54  
55  
56  
57  
58  
59  
60

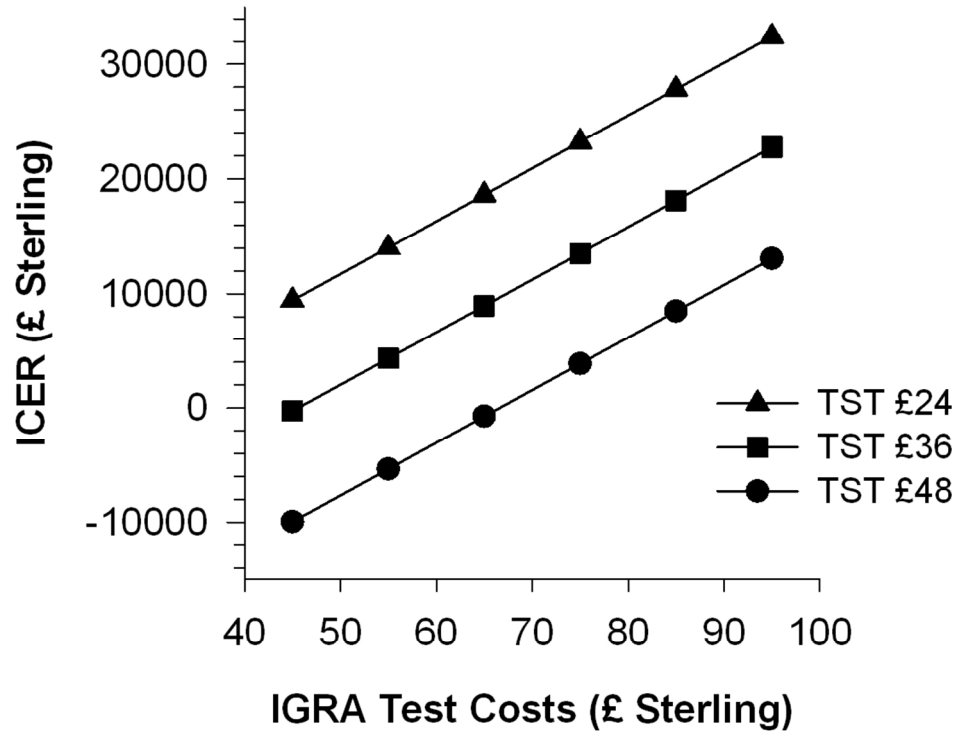

Figure 2: Impact of Wide Differences in Disease and Test Parameters on Cost-Effectiveness  
f. ICER, incremental cost per healthy life year gained, in the base case model versus TST and IGRA costs  
99x80mm (300 x 300 DPI)

For peer review only

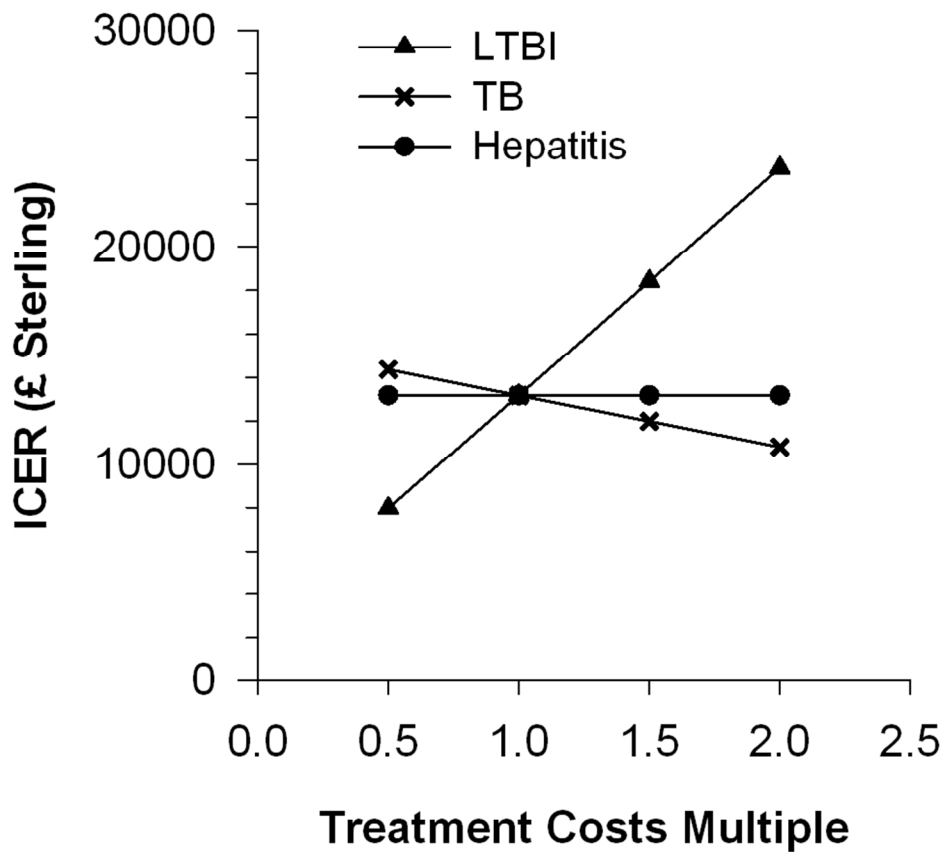

Figure 2: Impact of Wide Differences in Disease and Test Parameters on Cost-Effectiveness  
 g. ICER, incremental cost per healthy life year gained, in the market cost model versus four-fold variation in treatment costs  
 87x80mm (300 x 300 DPI)

only

## Screening of Health Care Workers for Tuberculosis: Development and Validation of a New Health Economic Model to Inform Practice

Merve Nazli Eralp<sup>1</sup>, Stefan Scholtes<sup>1</sup>, Geraldine Martell<sup>2</sup>, Robert Winter<sup>3</sup>, Andrew Robert Exley<sup>4</sup>

### Reporting Checklist after Drummond and Jefferson, BMJ Economic Evaluation Working Party, BMJ 1996; 313 : 275 :

#### STUDY DESIGN

- |                                                  |     |
|--------------------------------------------------|-----|
| (1) Research question                            | Yes |
| (2) Economic importance of the research question | Yes |
| (3) Viewpoint of the analysis                    | Yes |
| (4) Rationale for choosing the alternatives      | Yes |
| (5) The alternatives being compared              | Yes |
| (6) The form of economic evaluation              | Yes |
| (7) Justification of economic evaluation used    | Yes |

#### Data Collection

- |                                                                                                                                                |                          |
|------------------------------------------------------------------------------------------------------------------------------------------------|--------------------------|
| (8) The sources of effectiveness estimates used                                                                                                | Yes                      |
| (9) Details of the design and results of effectiveness study                                                                                   | Yes                      |
| (10) Details of the method of synthesis or meta-analysis of estimates are given (if based on an overview of a number of effectiveness studies) | Yes<br><i>referenced</i> |
| (11) The primary outcome measure(s) for the economic evaluation are clearly stated                                                             | Yes                      |
| (12) Methods to value health states and other benefits are stated                                                                              | Yes                      |
| (13) Details of the subjects from whom valuations were obtained are given                                                                      | <i>referenced</i>        |
| (14) Productivity changes (if included) are reported separately                                                                                | <i>not applicable</i>    |
| (15) The relevance of productivity changes to the study question is discussed                                                                  | <i>see discussion</i>    |
| (16) Quantities of resources are reported separately from their unit costs                                                                     | Yes                      |
| (17) Methods for the estimation of quantities and unit costs are described                                                                     | Yes                      |
| (18) Currency and price data are recorded                                                                                                      | Yes                      |
| (19) Details of currency of price adjustments for inflation or currency conversion are given                                                   | <i>No</i>                |
| (20) Details of any model used are given                                                                                                       | Yes                      |
| (21) The choice of model used and the key parameters on which it is based are justified                                                        | Yes                      |
| (21) The choice of model used and the key parameters on which it is based are justified                                                        | Yes                      |
| (22) Time horizon of costs and benefits is stated                                                                                              | Yes                      |
| (23) The discount rate(s) is stated                                                                                                            | Yes                      |
| (24) The choice of rate(s) is justified                                                                                                        | <i>standard rate</i>     |
| (25) An explanation is given if costs or benefits are not discounted                                                                           | <i>not applicable</i>    |
| (26) Details of statistical tests and confidence intervals are given for stochastic data                                                       | <i>ranges cited</i>      |
| (27) The approach to sensitivity analysis is given                                                                                             | Yes                      |
| (28) The choice of variables for sensitivity analysis is justified                                                                             | Yes                      |
| (29) The ranges over which the variables are varied are stated                                                                                 | Yes                      |
| (30) Relevant alternatives are compared                                                                                                        | Yes                      |
| (31) Incremental analysis is reported                                                                                                          | Yes                      |
| (32) Major outcomes are presented in a disaggregated as well as aggregated form                                                                | Yes                      |
| (33) The answer to the study question is given                                                                                                 | Yes                      |
| (34) Conclusions follow from the data reported                                                                                                 | Yes                      |
| (35) Conclusions are accompanied by the appropriate caveats                                                                                    | Yes                      |

Andrew Exley, on behalf of the authors

## Suppl.Table 1

Treatment costs based on  
NHS national tariff 2010 - 11

|                                                               | Cost £             | Unit rate<br>£ | HRG Code | Comment   | HCW hours<br>Units        | Subtotals   |
|---------------------------------------------------------------|--------------------|----------------|----------|-----------|---------------------------|-------------|
| <b>I Treatment costs for TB</b>                               |                    |                |          |           |                           |             |
| <b>A</b> Pulmonary TB = 54% cases in UK                       | £1,276             |                |          | HPA 2010  |                           | £325        |
| <b>B</b> Extra-pulmonary TB = 46% of cases in UK              | £2,062             |                |          | {3511}    |                           | £1,058      |
| <b>Mean cost</b>                                              | <b>£1,637</b>      |                |          |           | <b>HCW</b>                | <b>£662</b> |
| <b>NB Add health care worker costs, contact tracing costs</b> |                    |                |          |           |                           |             |
| <b>Total TB treatment costs</b>                               | <b>£4,908</b>      |                |          |           |                           |             |
| <b>A Pulmonary TB (54% of cases in UK)</b>                    |                    |                |          |           |                           |             |
| <b>Path</b> Positive Test                                     |                    |                |          |           |                           |             |
| 1 New patient Respiratory Medicine OPD,CXR etc                | £257               | £257           | 340      | WF01E mpc | 3                         | 3           |
| 1 Six months standard treatment                               |                    |                |          |           |                           |             |
| 1 Respiratory Medicine follow-up OPD                          |                    | £130           | 340      | WF02A mpc | 2                         |             |
| 1 2, 7 weeks                                                  | £260               |                |          |           |                           | 4           |
| 1 4, 6 months                                                 | £260               |                |          |           |                           | 4           |
| 2 Admission required, estimate 15%                            |                    |                |          |           |                           |             |
| Pulmonary, Pleural or other TB with CC                        | Hospital Ac        | £272           | £1,811   | DZ14A     | Elective                  |             |
| Pulmonary, Pleural or other TB without CC                     | Hospital Admission |                | £1,618   | DZ14B     |                           |             |
| based on 20 hospital days                                     |                    |                |          |           | 20                        | 3           |
| 3 No sputum, CXR suspicious                                   |                    |                |          |           |                           |             |
| Bronchoscopy and Lavage , estimate 30%                        | Day case           | £151           | £504     | DZ07Z     | Elective                  | 7.5    2.25 |
| 4 CT chest scan required, estimate 20%                        |                    | £23            | £114     | RA08Z     |                           |             |
| 5 after treatment e.g. cavitation                             |                    |                |          |           |                           |             |
| Additional OPD x2, in estimate 20%                            |                    | £52            |          |           | 2                         | 0.8         |
| 6 Hepatitis 2.5%                                              |                    |                |          |           |                           |             |
| Additional OPD x3                                             | £9.75              |                |          |           | Saukkonen, 2006<br>2 0.15 |             |
| 7 Liver failure                                               | Admission          | £1             | £2,715   | GC01Z     | 20                        | 0           |
|                                                               |                    |                |          |           | <b>hrs</b>                | 17.05       |
|                                                               |                    |                |          |           | <b>rate</b>               | £19.06      |
|                                                               |                    |                |          |           | <b>Cost</b>               | <b>£325</b> |
| <b>Subtotal PulTB 1</b>                                       | <b>£1,276</b>      |                |          |           |                           |             |

**Key** HRG health related group  
OPD outpatient attendance  
CXR chest radiograph  
mpc multi-professional clinic  
CC complications

| Treatment costs based on NHS national tariff 2010 - 11 |                                                                         | Cost £             | Unit rate £ | HRG Code | Comment         | HCW hours            |               |
|--------------------------------------------------------|-------------------------------------------------------------------------|--------------------|-------------|----------|-----------------|----------------------|---------------|
|                                                        |                                                                         |                    |             |          |                 | Units                | Subtotals     |
| <b>I Treatment costs for TB</b>                        |                                                                         |                    |             |          |                 |                      |               |
| <b>B Extra-Pulmonary TB (46% of cases in UK)</b>       |                                                                         |                    |             |          |                 |                      |               |
| <b>Peripheral LN TB (example used)</b>                 |                                                                         |                    |             |          |                 |                      |               |
| <b>Path</b>                                            | Positive Test                                                           |                    |             |          |                 |                      |               |
| 1                                                      | New patient Respiratory Medicine OPD + CXR                              | £257               | £257        | 340      | WF01E mpc       | 3                    | 3             |
| 1                                                      | Six months standard treatment                                           |                    |             |          |                 |                      |               |
| 1                                                      | Respiratory Medicine follow-up OPD                                      |                    | £130        | 340      | WF02A mpc       | 2                    |               |
| 1                                                      | 2, 7 weeks                                                              | £260               |             |          |                 |                      | 4             |
| 1                                                      | 4, 6 months                                                             | £260               |             |          |                 |                      | 4             |
| 2                                                      | Admission required, estimate 25% Pulmonary, Pleural or other TB with CC | Hospital Ac £453   | £1,811      | DZ14A    | Elective        |                      |               |
|                                                        | Pulmonary, Pleural or other TB without CC                               | Hospital Admission | £1,618      | DZ14B    |                 |                      |               |
|                                                        | based on 20 hospital days                                               |                    |             |          |                 | 20                   | 5             |
| 3                                                      | LN excision biopsy                                                      |                    |             |          |                 |                      |               |
|                                                        | Minor thoracic procedure                                                | £616               | £616        | DZ06Z    | Elective        | 37.5                 | 37.5          |
| 4                                                      | CT chest scan required, estimate 75%                                    | £86                | £114        | RA08Z    |                 |                      |               |
| 5                                                      | after treatment                                                         |                    |             |          |                 |                      |               |
|                                                        | Additional OPD x2, in estimate 50%                                      | £130               |             |          |                 | 2                    | 2             |
| 6                                                      | Hepatitis 2.5%                                                          |                    |             |          | Saukkonen, 2006 |                      |               |
|                                                        | Additional OPD x3                                                       | £9.75              |             |          |                 | 2                    | 0.15          |
| 7                                                      | Liver failure                                                           | Admission £1       | £2,715      | GC01Z    |                 | 20                   | 0             |
|                                                        |                                                                         |                    |             |          |                 | <b>hrs</b>           | 55.5          |
|                                                        |                                                                         |                    |             |          |                 | <b>Rate</b>          | £19.06        |
|                                                        | <b>Subtotal ExPulTB 1</b>                                               | <b>£2,062</b>      |             |          |                 | <b>HCW time Cost</b> | <b>£1,058</b> |
| <b>II Treatment costs for LTBI</b>                     |                                                                         |                    |             |          |                 |                      |               |
| <b>C LTBI , 3 mths INAH + Rifampicin</b>               |                                                                         |                    |             |          |                 |                      |               |
| <b>Path</b>                                            | Positive test                                                           |                    |             |          |                 |                      |               |
| 1                                                      | New patient Respiratory Medicine OPD,CXR etc                            | £257               | 257         | 340      | WF01E mpc       | 3                    | 3             |
| 1                                                      | Six months standard treatment                                           |                    |             |          |                 |                      |               |
| 1                                                      | Respiratory Medicine follow-up OPD                                      |                    | 130         | 340      | WF02A mpc       | 2                    |               |
| 1                                                      | 2, 7,12 weeks                                                           | £390               |             |          |                 |                      | 6             |
|                                                        | Hepatitis risk, 1.77%                                                   |                    |             |          |                 |                      |               |
|                                                        | Additional OPD x3                                                       | £7                 |             |          |                 | 0.11                 |               |
|                                                        |                                                                         |                    |             |          |                 | <b>hrs</b>           | 9.00          |
|                                                        |                                                                         |                    |             |          |                 | <b>rate</b>          | £19.06        |
|                                                        | <b>Subtotal LTBI</b>                                                    | <b>£647</b>        |             |          |                 | <b>HCW time Cost</b> | <b>£172</b>   |
|                                                        | <b>total</b>                                                            | <b>£819</b>        |             |          |                 |                      |               |

| Treatment costs based on NHS national tariff 2010 - 11 |                                              | Cost £        | Unit rate | HRG Code | Comment | HCW hours            | Subtotals   |
|--------------------------------------------------------|----------------------------------------------|---------------|-----------|----------|---------|----------------------|-------------|
|                                                        |                                              | £             |           |          |         | Units                |             |
| <b>III</b>                                             | <b>Contact tracing</b>                       |               |           |          |         |                      |             |
| <b>Path</b>                                            | 5 Contacts Traced per case<br>fig 7 {3627}   | <b>£2,132</b> |           |          |         |                      | <b>£476</b> |
|                                                        | 1 Initial contact by Telephone               | 23            | £23       |          |         |                      |             |
|                                                        | 1 New patient Respiratory Medicine OPD + CXR | 257           | 257 340   | WF01E    | mpc     | 3                    | 3           |
|                                                        | 1 Respiratory Medicine follow-up OPD         | 130           | 130 340   | WF02A    | mpc     | 2                    | 2           |
|                                                        | <b>subtotal CT1</b>                          | 410           |           |          |         |                      | 5           |
|                                                        | 1% have active TB                            | £16           |           |          |         | <b>hrs rate</b>      | 5           |
|                                                        | <b>subtotal CT2</b>                          | <b>£426</b>   |           |          |         |                      | £19.06      |
|                                                        | <b>5 contacts per case</b>                   | <b>£2,608</b> |           |          |         | <b>HCW time Cost</b> | <b>£95</b>  |

| Treatment costs based on NHS national tariff 2010 - 11 |                                                                          | Cost £       | Unit rate | HRG Code | Comment | HCW hours            | Subtotals   |
|--------------------------------------------------------|--------------------------------------------------------------------------|--------------|-----------|----------|---------|----------------------|-------------|
|                                                        |                                                                          | £            |           |          |         | Units                |             |
| <b>IV</b>                                              | <b>Hepatitis</b>                                                         |              |           |          |         |                      |             |
| <b>Path</b>                                            | 1 Respiratory Medicine follow-up OPD x3<br>Estimated sick leave per case | £390<br>£250 | 130 340   | WF02A    | mpc     | 2                    | 6           |
|                                                        | Note: allocation for liver failure in TB costs<br>see IA 7               |              |           |          |         | <b>hrs rate</b>      | 6           |
|                                                        |                                                                          | <b>£640</b>  |           |          |         |                      | £19.06      |
|                                                        | <b>Total</b>                                                             | <b>£755</b>  |           |          |         | <b>HCW time Cost</b> | <b>£114</b> |

|          |                               |                 |               |  |  |  |  |
|----------|-------------------------------|-----------------|---------------|--|--|--|--|
| <b>V</b> | <b>Mantoux test</b>           |                 |               |  |  |  |  |
|          | Test reagents and disposables | <i>estimate</i> | £17.25        |  |  |  |  |
|          | Apply and Read Skin Test      | 2*0.33 hr a     | £12.58        |  |  |  |  |
|          | Admin, postage, stationary    |                 | £7.50         |  |  |  |  |
|          | Subtotal                      |                 | £37.33        |  |  |  |  |
|          | Overheads                     | <i>30% rate</i> | £11.20        |  |  |  |  |
|          | <b>Total</b>                  |                 | <b>£48.53</b> |  |  |  |  |

**Reference**

Saukkonen JJ et al,  
An Official ATS Statement:  
Hepatotoxicity of Antituberculosis Therapy.  
Am.J.Respir.Crit.Care Med. 174 (8):935-952, 2006.



## Health Economic Models Inform Screening for Tuberculosis

1  
2  
3  
4  
5  
6  
7  
8  
9  
10  
11  
12  
13  
14  
15  
16  
17  
18  
19  
20  
21  
22  
23  
24  
25  
26  
27  
28  
29  
30  
31  
32  
33  
34  
35  
36  
37  
38  
39  
40  
41  
42  
43  
44  
45  
46  
47  
48  
49  
50  
51  
52  
53  
54  
55  
56  
57  
58  
59  
60

| Suppl.Table 2 |                    | Sensitivity     | Analysis    |             |                      |                      | Incremental                            |             |
|---------------|--------------------|-----------------|-------------|-------------|----------------------|----------------------|----------------------------------------|-------------|
|               |                    |                 | Incremental |             | Incremental          | Cost / Eff           | Cost-<br>Effectiveness<br>Ratio (ICER) |             |
| 2a            | IGRA               | Strategy        | Cost        | Cost        | Effectiveness        | Effectiveness        | ICER                                   |             |
|               | 0.9                | IGRA+TST        | £81.59      | £0.00       | 19.07438             | 0                    | 4.27738                                | £0          |
|               | 0.91               | IGRA+TST        | £80.95      | £0.00       | 19.07455             | 0                    | 4.24394                                | £0          |
|               | 0.92               | IGRA+TST        | £80.32      | £0.00       | 19.07471             | 0                    | 4.21058                                | £0          |
|               | 0.93               | IGRA+TST        | £79.68      | £0.00       | 19.07487             | 0                    | 4.17734                                | £0          |
|               | 0.94               | IGRA+TST        | £79.05      | £0.00       | 19.07504             | 0                    | 4.14427                                | £0          |
|               | 0.95               | IGRA+TST        | £78.43      | £0.00       | 19.0752              | 0                    | 4.11142                                | £0          |
|               | 0.96               | IGRA+TST        | £77.81      | £0.00       | 19.07536             | 0                    | 4.07888                                | £0          |
|               | 0.97               | IGRA+TST        | £77.19      | £0.00       | 19.07553             | 0                    | 4.04679                                | £0          |
|               | 0.98               | IGRA+TST        | £76.60      | £0.00       | 19.07569             | 0                    | 4.01539                                | £0          |
|               | 0.99               | IGRA+TST        | £76.02      | £0.00       | 19.07585             | 0                    | 3.9851                                 | £0          |
|               | 0.9                | IGRA            | £165.39     | £83.81      | 19.07583             | 0.00144              | 8.67038                                | £58,089     |
|               | 0.91               | IGRA            | £157.13     | £76.17      | 19.07599             | 0.00145              | 8.23685                                | £52,664     |
|               | 0.92               | IGRA            | £148.86     | £68.55      | 19.07616             | 0.00145              | 7.80356                                | £47,281     |
|               | 0.93               | IGRA            | £140.60     | £60.92      | 19.07633             | 0.00145              | 7.3706                                 | £41,939     |
|               | 0.94               | IGRA            | £132.35     | £53.30      | 19.07649             | 0.00145              | 6.93805                                | £36,634     |
|               | 0.95               | IGRA            | £124.11     | £45.69      | 19.07666             | 0.00146              | 6.50607                                | £31,365     |
|               | 0.96               | IGRA            | £115.89     | £38.08      | 19.07682             | 0.00146              | 6.07488                                | £26,131     |
|               | 0.97               | IGRA            | £107.69     | £30.49      | 19.07698             | 0.00146              | 5.64485                                | £20,929     |
|               | 0.98               | IGRA            | £99.52      | £22.92      | 19.07714             | 0.00145              | 5.2166                                 | £15,757     |
|               | 0.99               | IGRA            | £91.41      | £15.39      | 19.0773              | 0.00145              | 4.79137                                | £10,614     |
| <b>2b</b>     | <b>IGRA</b>        |                 |             |             |                      |                      |                                        |             |
|               | <b>Sensitivity</b> | <b>Strategy</b> | <b>Cost</b> | <b>Cost</b> | <b>Effectiveness</b> | <b>Effectiveness</b> | <b>Cost / Eff</b>                      | <b>ICER</b> |
|               | 0.82               | IGRA+TST        | £74.34      | £0.00       | 19.07568             | 0                    | 3.89697                                | £0          |
|               | 0.84               | IGRA+TST        | £74.84      | £0.00       | 19.07568             | 0                    | 3.92327                                | £0          |
|               | 0.86               | IGRA+TST        | £75.34      | £0.00       | 19.07568             | 0                    | 3.94958                                | £0          |
|               | 0.87               | IGRA+TST        | £75.84      | £0.00       | 19.07569             | 0                    | 3.97589                                | £0          |
|               | 0.89               | IGRA+TST        | £76.35      | £0.00       | 19.07569             | 0                    | 4.00222                                | £0          |
|               | 0.91               | IGRA+TST        | £76.85      | £0.00       | 19.07569             | 0                    | 4.02856                                | £0          |
|               | 0.93               | IGRA+TST        | £77.35      | £0.00       | 19.07569             | 0                    | 4.05492                                | £0          |
|               | 0.94               | IGRA+TST        | £77.85      | £0.00       | 19.07569             | 0                    | 4.08128                                | £0          |
|               | 0.96               | IGRA+TST        | £78.36      | £0.00       | 19.07569             | 0                    | 4.10766                                | £0          |
|               | 0.98               | IGRA+TST        | £78.86      | £0.00       | 19.07569             | 0                    | 4.13405                                | £0          |
|               | 0.82               | IGRA            | £98.19      | £23.86      | 19.07679             | 0.0011               | 5.14723                                | £21,589     |
|               | 0.84               | IGRA            | £98.49      | £23.65      | 19.07687             | 0.00118              | 5.16266                                | £19,999     |
|               | 0.86               | IGRA            | £98.78      | £23.44      | 19.07694             | 0.00126              | 5.17808                                | £18,602     |
|               | 0.87               | IGRA            | £99.08      | £23.23      | 19.07702             | 0.00134              | 5.1935                                 | £17,366     |
|               | 0.89               | IGRA            | £99.37      | £23.03      | 19.0771              | 0.00142              | 5.2089                                 | £16,264     |
|               | 0.91               | IGRA            | £99.66      | £22.82      | 19.07718             | 0.00149              | 5.2243                                 | £15,276     |
|               | 0.93               | IGRA            | £99.96      | £22.61      | 19.07726             | 0.00157              | 5.23969                                | £14,384     |
|               | 0.94               | IGRA            | £100.25     | £22.40      | 19.07734             | 0.00165              | 5.25508                                | £13,576     |
|               | 0.96               | IGRA            | £100.55     | £22.19      | 19.07742             | 0.00173              | 5.27046                                | £12,840     |
|               | 0.98               | IGRA            | £100.84     | £21.98      | 19.07749             | 0.00181              | 5.28583                                | £12,166     |

## Health Economic Models Inform Screening for Tuberculosis

Suppl. Table 3

3a

| Deaths,<br>All causes | Strategy | Incremental |        | Incremental   |               | Cost / Eff | ICER    |
|-----------------------|----------|-------------|--------|---------------|---------------|------------|---------|
|                       |          | Cost        | Cost   | Effectiveness | Effectiveness |            |         |
| 0.0045                | IGRA+TST | £76.60      | £0.00  | 19.07569      | 0             | 4.01539    | £0      |
| 0.009                 | IGRA+TST | £76.17      | £0.00  | 18.20799      | 0             | 4.18356    | £0      |
| 0.0135                | IGRA+TST | £75.77      | £0.00  | 17.38801      | 0             | 4.3577     | £0      |
| 0.018                 | IGRA+TST | £75.39      | £0.00  | 16.61293      | 0             | 4.5379     | £0      |
| 0.0225                | IGRA+TST | £75.02      | £0.00  | 15.88011      | 0             | 4.72424    | £0      |
| 0.027                 | IGRA+TST | £74.67      | £0.00  | 15.18706      | 0             | 4.9168     | £0      |
| 0.0315                | IGRA+TST | £74.34      | £0.00  | 14.53146      | 0             | 5.11565    | £0      |
| 0.036                 | IGRA+TST | £74.02      | £0.00  | 13.91111      | 0             | 5.32085    | £0      |
| 0.0405                | IGRA+TST | £73.71      | £0.00  | 13.32393      | 0             | 5.53247    | £0      |
| 0.045                 | IGRA+TST | £73.42      | £0.00  | 12.768        | 0             | 5.75055    | £0      |
| 0.0045                | IGRA     | £99.52      | £22.92 | 19.07714      | 0.00145       | 5.2166     | £15,757 |
| 0.009                 | IGRA     | £99.23      | £23.05 | 18.20939      | 0.00139       | 5.44929    | £16,544 |
| 0.0135                | IGRA     | £98.95      | £23.18 | 17.38935      | 0.00134       | 5.69038    | £17,357 |
| 0.018                 | IGRA     | £98.69      | £23.30 | 16.61421      | 0.00128       | 5.93999    | £18,197 |
| 0.0225                | IGRA     | £98.44      | £23.42 | 15.88134      | 0.00123       | 6.19826    | £19,063 |
| 0.027                 | IGRA     | £98.20      | £23.52 | 15.18824      | 0.00118       | 6.46529    | £19,955 |
| 0.0315                | IGRA     | £97.97      | £23.63 | 14.53259      | 0.00113       | 6.74119    | £20,874 |
| 0.036                 | IGRA     | £97.75      | £23.73 | 13.91219      | 0.00109       | 7.02605    | £21,820 |
| 0.0405                | IGRA     | £97.54      | £23.82 | 13.32498      | 0.00105       | 7.31996    | £22,792 |
| 0.045                 | IGRA     | £97.34      | £23.92 | 12.769        | 0.00101       | 7.623      | £23,791 |

3b

| TB Deaths | Strategy | Incremental |        | Incremental   |               | Cost / Eff | ICER    |
|-----------|----------|-------------|--------|---------------|---------------|------------|---------|
|           |          | Cost        | Cost   | Effectiveness | Effectiveness |            |         |
| 0.018     | IGRA+TST | £76.60      | £0.00  | 19.07569      | 0             | 4.01539    | £0      |
| 0.036     | IGRA+TST | £76.58      | £0.00  | 19.07496      | 0             | 4.01486    | £0      |
| 0.054     | IGRA+TST | £76.57      | £0.00  | 19.07423      | 0             | 4.01433    | £0      |
| 0.072     | IGRA+TST | £76.56      | £0.00  | 19.07351      | 0             | 4.01381    | £0      |
| 0.09      | IGRA+TST | £76.54      | £0.00  | 19.07278      | 0             | 4.01328    | £0      |
| 0.108     | IGRA+TST | £76.53      | £0.00  | 19.07206      | 0             | 4.01275    | £0      |
| 0.126     | IGRA+TST | £76.52      | £0.00  | 19.07134      | 0             | 4.01223    | £0      |
| 0.144     | IGRA+TST | £76.51      | £0.00  | 19.07062      | 0             | 4.0117     | £0      |
| 0.162     | IGRA+TST | £76.49      | £0.00  | 19.0699       | 0             | 4.01118    | £0      |
| 0.18      | IGRA+TST | £76.48      | £0.00  | 19.06918      | 0             | 4.01066    | £0      |
| 0.018     | IGRA     | £99.52      | £22.92 | 19.07714      | 0.00145       | 5.2166     | £15,757 |
| 0.036     | IGRA     | £99.51      | £22.92 | 19.0766       | 0.00164       | 5.21625    | £13,995 |
| 0.054     | IGRA     | £99.50      | £22.93 | 19.07605      | 0.00182       | 5.21589    | £12,591 |
| 0.072     | IGRA     | £99.49      | £22.93 | 19.07551      | 0.002         | 5.21554    | £11,444 |
| 0.09      | IGRA     | £99.48      | £22.94 | 19.07497      | 0.00219       | 5.21519    | £10,491 |
| 0.108     | IGRA     | £99.47      | £22.94 | 19.07443      | 0.00237       | 5.21483    | £9,686  |
| 0.126     | IGRA     | £99.46      | £22.94 | 19.07389      | 0.00255       | 5.21448    | £8,997  |
| 0.144     | IGRA     | £99.45      | £22.95 | 19.07335      | 0.00273       | 5.21413    | £8,401  |
| 0.162     | IGRA     | £99.44      | £22.95 | 19.07281      | 0.00291       | 5.21378    | £7,880  |
| 0.18      | IGRA     | £99.43      | £22.95 | 19.07227      | 0.00309       | 5.21343    | £7,420  |

## Health Economic Models Inform Screening for Tuberculosis

1  
2  
3  
4  
5  
6  
7  
8  
9  
10  
11  
12  
13  
14  
15  
16  
17  
18  
19  
20  
21  
22  
23  
24  
25  
26  
27  
28  
29  
30  
31  
32  
33  
34  
35  
36  
37  
38  
39  
40  
41  
42  
43  
44  
45  
46  
47  
48  
49  
50  
51  
52  
53  
54  
55  
56  
57  
58  
59  
60

| <b>3c</b>         |          | Incremental |        | Incremental   |               | Cost / Eff | ICER    |
|-------------------|----------|-------------|--------|---------------|---------------|------------|---------|
| <b>Prevalence</b> | Strategy | Cost        | Cost   | Effectiveness | Effectiveness |            |         |
| 0.035             | IGRA+TST | £76.60      | £0.00  | 19.07569      | 0             | 4.01539    | £0      |
| 0.07              | IGRA+TST | £116.83     | £0.00  | 19.07038      | 0             | 6.12618    | £0      |
| 0.105             | IGRA+TST | £156.98     | £0.00  | 19.06508      | 0             | 8.234      | £0      |
| 0.14              | IGRA+TST | £197.08     | £0.00  | 19.0598       | 0             | 10.34018   | £0      |
| 0.175             | IGRA+TST | £237.13     | £0.00  | 19.05454      | 0             | 12.44492   | £0      |
| 0.21              | IGRA+TST | £277.13     | £2.03  | 19.0493       | -0.00873      | 14.54813   | -£233   |
| 0.245             | IGRA+TST | £317.08     | £6.91  | 19.04407      | -0.01014      | 16.64955   | -£682   |
| 0.28              | IGRA+TST | £356.96     | £11.74 | 19.03887      | -0.01152      | 18.74887   | -£1,019 |
| 0.315             | IGRA+TST | £396.77     | £16.49 | 19.0337       | -0.01288      | 20.84569   | -£1,281 |
| 0.35              | IGRA+TST | £436.51     | £21.17 | 19.02855      | -0.01421      | 22.9395    | -£1,490 |
| 0.035             | IGRA     | £99.52      | £22.92 | 19.07714      | 0.00145       | 5.2166     | £15,757 |
| 0.07              | IGRA     | £134.75     | £17.92 | 19.07331      | 0.00293       | 7.06496    | £6,111  |
| 0.105             | IGRA     | £169.88     | £12.89 | 19.06949      | 0.0044        | 8.9083     | £2,928  |
| 0.14              | IGRA     | £204.96     | £7.88  | 19.06567      | 0.00586       | 10.75046   | £1,345  |
| 0.175             | IGRA     | £240.04     | £2.90  | 19.06185      | 0.00731       | 12.59253   | £398    |
| 0.21              | IGRA     | £275.10     | £0.00  | 19.05803      | 0             | 14.43492   | £0      |
| 0.245             | IGRA     | £310.16     | £0.00  | 19.05421      | 0             | 16.27784   | £0      |
| 0.28              | IGRA     | £345.22     | £0.00  | 19.05039      | 0             | 18.1214    | £0      |
| 0.315             | IGRA     | £380.28     | £0.00  | 19.04658      | 0             | 19.96564   | £0      |
| 0.35              | IGRA     | £415.33     | £0.00  | 19.04276      | 0             | 21.8106    | £0      |

| <b>3d</b>         |          | Incremental |        | Incremental   |               | Cost / Eff | ICER    |
|-------------------|----------|-------------|--------|---------------|---------------|------------|---------|
| <b>Prevalence</b> | Strategy | Cost        | Cost   | Effectiveness | Effectiveness |            |         |
| 1.00E-04          | IGRA+TST | £76.60      | £0.00  | 19.07569      | 0             | 4.01539    | £0      |
| 2.00E-04          | IGRA+TST | £77.10      | £0.00  | 19.07565      | 0             | 4.04193    | £0      |
| 3.00E-04          | IGRA+TST | £77.61      | £0.00  | 19.07561      | 0             | 4.06839    | £0      |
| 4.00E-04          | IGRA+TST | £78.11      | £0.00  | 19.07557      | 0             | 4.09478    | £0      |
| 5.00E-04          | IGRA+TST | £78.61      | £0.00  | 19.07553      | 0             | 4.1211     | £0      |
| 6.00E-04          | IGRA+TST | £79.11      | £0.00  | 19.07549      | 0             | 4.14735    | £0      |
| 7.00E-04          | IGRA+TST | £79.61      | £0.00  | 19.07545      | 0             | 4.17353    | £0      |
| 8.00E-04          | IGRA+TST | £80.11      | £0.00  | 19.07541      | 0             | 4.19964    | £0      |
| 9.00E-04          | IGRA+TST | £80.61      | £0.00  | 19.07537      | 0             | 4.22568    | £0      |
| 0.001             | IGRA+TST | £81.10      | £0.00  | 19.07533      | 0             | 4.25165    | £0      |
| 1.00E-04          | IGRA     | £99.52      | £22.92 | 19.07714      | 0.00145       | 5.2166     | £15,757 |
| 2.00E-04          | IGRA     | £100.45     | £23.35 | 19.07706      | 0.00141       | 5.26539    | £16,529 |
| 3.00E-04          | IGRA     | £101.38     | £23.77 | 19.07698      | 0.00137       | 5.31406    | £17,347 |
| 4.00E-04          | IGRA     | £102.30     | £24.19 | 19.07689      | 0.00133       | 5.36263    | £18,216 |
| 5.00E-04          | IGRA     | £103.23     | £24.61 | 19.07681      | 0.00129       | 5.4111     | £19,139 |
| 6.00E-04          | IGRA     | £104.15     | £25.04 | 19.07673      | 0.00124       | 5.45945    | £20,123 |
| 7.00E-04          | IGRA     | £105.07     | £25.46 | 19.07665      | 0.0012        | 5.5077     | £21,174 |
| 8.00E-04          | IGRA     | £105.99     | £25.88 | 19.07657      | 0.00116       | 5.55585    | £22,299 |
| 9.00E-04          | IGRA     | £106.90     | £26.30 | 19.07649      | 0.00112       | 5.6039     | £23,505 |
| 0.001             | IGRA     | £107.82     | £26.72 | 19.07641      | 0.00108       | 5.65184    | £24,802 |

Health Economic Models Inform Screening for Tuberculosis

**3e**

| Relapse Rate | Strategy | Cost    | Incremental Cost | Effectiveness | Incremental Effectiveness | Cost / Eff | ICER    |
|--------------|----------|---------|------------------|---------------|---------------------------|------------|---------|
| 0.0315       | IGRA+TST | £76.60  | £0.00            | 19.07569      | 0                         | 4.01539    | £0      |
| 0.063        | IGRA+TST | £77.72  | £0.00            | 19.07525      | 0                         | 4.07427    | £0      |
| 0.0945       | IGRA+TST | £78.96  | £0.00            | 19.07476      | 0                         | 4.13933    | £0      |
| 0.126        | IGRA+TST | £80.33  | £0.00            | 19.07422      | 0                         | 4.21123    | £0      |
| 0.1575       | IGRA+TST | £81.84  | £0.00            | 19.07361      | 0                         | 4.29067    | £0      |
| 0.189        | IGRA+TST | £83.51  | £0.00            | 19.07294      | 0                         | 4.37835    | £0      |
| 0.2205       | IGRA+TST | £85.35  | £0.00            | 19.07219      | 0                         | 4.475      | £0      |
| 0.252        | IGRA+TST | £87.37  | £0.00            | 19.07136      | 0                         | 4.58127    | £0      |
| 0.2835       | IGRA+TST | £89.59  | £0.00            | 19.07045      | 0                         | 4.69774    | £0      |
| 0.315        | IGRA+TST | £92.01  | £0.00            | 19.06944      | 0                         | 4.82489    | £0      |
| 0.0315       | IGRA     | £99.52  | £22.92           | 19.07714      | 0.00145                   | 5.2166     | £15,757 |
| 0.063        | IGRA     | £100.35 | £22.63           | 19.07682      | 0.00158                   | 5.2601     | £14,365 |
| 0.0945       | IGRA     | £101.26 | £22.31           | 19.07647      | 0.00171                   | 5.30821    | £13,052 |
| 0.126        | IGRA     | £102.28 | £21.95           | 19.07607      | 0.00186                   | 5.36143    | £11,819 |
| 0.1575       | IGRA     | £103.40 | £21.56           | 19.07563      | 0.00202                   | 5.4203     | £10,664 |
| 0.189        | IGRA     | £104.63 | £21.13           | 19.07514      | 0.0022                    | 5.48537    | £9,587  |
| 0.2205       | IGRA     | £106.00 | £20.65           | 19.07459      | 0.0024                    | 5.5572     | £8,589  |
| 0.252        | IGRA     | £107.51 | £20.14           | 19.07399      | 0.00263                   | 5.63633    | £7,668  |
| 0.2835       | IGRA     | £109.16 | £19.57           | 19.07332      | 0.00287                   | 5.72324    | £6,823  |
| 0.315        | IGRA     | £110.97 | £18.96           | 19.07258      | 0.00313                   | 5.81832    | £6,051  |

**3f**

| Hepatitis rate | Strategy | Cost    | Incremental Cost | Effectiveness | Incremental Effectiveness | Cost / Eff | ICER    |
|----------------|----------|---------|------------------|---------------|---------------------------|------------|---------|
| 0.0177         | IGRA+TST | £76.60  | £0.00            | 19.07569      | 0                         | 4.01539    | £0      |
| 0.0354         | IGRA+TST | £77.23  | £0.00            | 19.07476      | 0                         | 4.04875    | £0      |
| 0.0531         | IGRA+TST | £77.86  | £0.00            | 19.07383      | 0                         | 4.08211    | £0      |
| 0.0708         | IGRA+TST | £78.49  | £0.00            | 19.0729       | 0                         | 4.11548    | £0      |
| 0.0885         | IGRA+TST | £79.13  | £0.00            | 19.07197      | 0                         | 4.14884    | £0      |
| 0.1062         | IGRA+TST | £79.76  | £0.00            | 19.07105      | 0                         | 4.18221    | £0      |
| 0.1239         | IGRA+TST | £80.39  | £0.00            | 19.07012      | 0                         | 4.21559    | £0      |
| 0.1416         | IGRA+TST | £81.02  | £0.00            | 19.06919      | 0                         | 4.24896    | £0      |
| 0.1593         | IGRA+TST | £81.66  | £0.00            | 19.06826      | 0                         | 4.28234    | £0      |
| 0.177          | IGRA+TST | £82.29  | £0.00            | 19.06733      | 0                         | 4.31573    | £0      |
| 0.0177         | IGRA     | £99.52  | £22.92           | 19.07714      | 0.00145                   | 5.2166     | £15,757 |
| 0.0354         | IGRA     | £100.15 | £22.92           | 19.07622      | 0.00146                   | 5.24994    | £15,733 |
| 0.0531         | IGRA     | £100.78 | £22.92           | 19.07529      | 0.00146                   | 5.28328    | £15,709 |
| 0.0708         | IGRA     | £101.41 | £22.92           | 19.07436      | 0.00146                   | 5.31663    | £15,685 |
| 0.0885         | IGRA     | £102.04 | £22.92           | 19.07344      | 0.00146                   | 5.34997    | £15,662 |
| 0.1062         | IGRA     | £102.67 | £22.91           | 19.07251      | 0.00147                   | 5.38332    | £15,638 |
| 0.1239         | IGRA     | £103.30 | £22.91           | 19.07159      | 0.00147                   | 5.41668    | £15,615 |
| 0.1416         | IGRA     | £103.94 | £22.91           | 19.07066      | 0.00147                   | 5.45004    | £15,591 |
| 0.1593         | IGRA     | £104.57 | £22.91           | 19.06973      | 0.00147                   | 5.4834     | £15,568 |
| 0.177          | IGRA     | £105.20 | £22.91           | 19.06881      | 0.00147                   | 5.51676    | £15,545 |

## Health Economic Models Inform Screening for Tuberculosis

1  
2  
3  
4  
5  
6  
7  
8  
9  
10  
11  
12  
13  
14  
15  
16  
17  
18  
19  
20  
21  
22  
23  
24  
25  
26  
27  
28  
29  
30  
31  
32  
33  
34  
35  
36  
37  
38  
39  
40  
41  
42  
43  
44  
45  
46  
47  
48  
49  
50  
51  
52  
53  
54  
55  
56  
57  
58  
59  
60

| <b>3g<br/>IGRA</b> |                 | Incremental |             | Incremental          |                      | Cost / Eff | ICER    |
|--------------------|-----------------|-------------|-------------|----------------------|----------------------|------------|---------|
| <b>Repeat Rate</b> | <b>Strategy</b> | <b>Cost</b> | <b>Cost</b> | <b>Effectiveness</b> | <b>Effectiveness</b> |            |         |
| 0.015              | IGRA+TST        | £75.98      | £0.00       | 19.07569             | 0                    | 3.98287    | £0      |
| 0.03               | IGRA+TST        | £76.46      | £0.00       | 19.07569             | 0                    | 4.00814    | £0      |
| 0.045              | IGRA+TST        | £76.94      | £0.00       | 19.07569             | 0                    | 4.03344    | £0      |
| 0.06               | IGRA+TST        | £77.42      | £0.00       | 19.07569             | 0                    | 4.05875    | £0      |
| 0.075              | IGRA+TST        | £77.91      | £0.00       | 19.07568             | 0                    | 4.08409    | £0      |
| 0.09               | IGRA+TST        | £78.39      | £0.00       | 19.07568             | 0                    | 4.10945    | £0      |
| 0.105              | IGRA+TST        | £78.87      | £0.00       | 19.07568             | 0                    | 4.13484    | £0      |
| 0.12               | IGRA+TST        | £79.36      | £0.00       | 19.07568             | 0                    | 4.16025    | £0      |
| 0.135              | IGRA+TST        | £79.84      | £0.00       | 19.07568             | 0                    | 4.18568    | £0      |
| 0.15               | IGRA+TST        | £80.33      | £0.00       | 19.07568             | 0                    | 4.21115    | £0      |
| 0.015              | IGRA            | £98.64      | £22.66      | 19.07714             | 0.00146              | 5.17048    | £15,573 |
| 0.03               | IGRA            | £99.32      | £22.86      | 19.07714             | 0.00145              | 5.20633    | £15,716 |
| 0.045              | IGRA            | £100.01     | £23.07      | 19.07714             | 0.00145              | 5.24219    | £15,859 |
| 0.06               | IGRA            | £100.69     | £23.27      | 19.07714             | 0.00145              | 5.27807    | £16,002 |
| 0.075              | IGRA            | £101.38     | £23.47      | 19.07714             | 0.00145              | 5.31398    | £16,144 |
| 0.09               | IGRA            | £102.06     | £23.67      | 19.07714             | 0.00145              | 5.34991    | £16,287 |
| 0.105              | IGRA            | £102.75     | £23.87      | 19.07714             | 0.00145              | 5.38586    | £16,430 |
| 0.12               | IGRA            | £103.43     | £24.07      | 19.07713             | 0.00145              | 5.42184    | £16,574 |
| 0.135              | IGRA            | £104.12     | £24.28      | 19.07713             | 0.00145              | 5.45785    | £16,717 |
| 0.15               | IGRA            | £104.81     | £24.48      | 19.07713             | 0.00145              | 5.49388    | £16,860 |

| <b>3h<br/>TST</b>  |                 | Incremental |             | Incremental          |                      | Cost / Eff | ICER    |
|--------------------|-----------------|-------------|-------------|----------------------|----------------------|------------|---------|
| <b>Repeat Rate</b> | <b>Strategy</b> | <b>Cost</b> | <b>Cost</b> | <b>Effectiveness</b> | <b>Effectiveness</b> |            |         |
| 0.025              | IGRA+TST        | £74.95      | £0.00       | 19.07542             | 0                    | 3.92919    | £0      |
| 0.05               | IGRA+TST        | £75.23      | £0.00       | 19.07546             | 0                    | 3.94368    | £0      |
| 0.075              | IGRA+TST        | £75.50      | £0.00       | 19.07551             | 0                    | 3.95817    | £0      |
| 0.1                | IGRA+TST        | £75.78      | £0.00       | 19.07555             | 0                    | 3.97267    | £0      |
| 0.125              | IGRA+TST        | £76.06      | £0.00       | 19.0756              | 0                    | 3.98716    | £0      |
| 0.15               | IGRA+TST        | £76.33      | £0.00       | 19.07564             | 0                    | 4.00165    | £0      |
| 0.175              | IGRA+TST        | £76.61      | £0.00       | 19.07569             | 0                    | 4.01615    | £0      |
| 0.2                | IGRA+TST        | £76.89      | £0.00       | 19.07573             | 0                    | 4.03064    | £0      |
| 0.225              | IGRA+TST        | £77.16      | £0.00       | 19.07578             | 0                    | 4.04513    | £0      |
| 0.25               | IGRA+TST        | £77.44      | £0.00       | 19.07583             | 0                    | 4.05962    | £0      |
| 0.025              | IGRA            | £99.52      | £24.57      | 19.07714             | 0.00172              | 5.2166     | £14,242 |
| 0.05               | IGRA            | £99.52      | £24.29      | 19.07714             | 0.00168              | 5.2166     | £14,462 |
| 0.075              | IGRA            | £99.52      | £24.01      | 19.07714             | 0.00163              | 5.2166     | £14,695 |
| 0.1                | IGRA            | £99.52      | £23.74      | 19.07714             | 0.00159              | 5.2166     | £14,942 |
| 0.125              | IGRA            | £99.52      | £23.46      | 19.07714             | 0.00154              | 5.2166     | £15,202 |
| 0.15               | IGRA            | £99.52      | £23.18      | 19.07714             | 0.0015               | 5.2166     | £15,479 |
| 0.175              | IGRA            | £99.52      | £22.91      | 19.07714             | 0.00145              | 5.2166     | £15,773 |
| 0.2                | IGRA            | £99.52      | £22.63      | 19.07714             | 0.00141              | 5.2166     | £16,085 |
| 0.225              | IGRA            | £99.52      | £22.35      | 19.07714             | 0.00136              | 5.2166     | £16,419 |
| 0.25               | IGRA            | £99.52      | £22.08      | 19.07714             | 0.00132              | 5.2166     | £16,776 |

## Health Economic Models Inform Screening for Tuberculosis

1  
2 **Suppl. Table 4**  
3 **TST, IGRA Costs**

4 **TST £24**

| 5 <b>IGRA Cost</b> | Strategy    | Cost    | Incremental Cost | Effectiveness | Incremental Effectiveness | Cost / Eff | ICER    |
|--------------------|-------------|---------|------------------|---------------|---------------------------|------------|---------|
| 6                  | 45 IGRA+TST | £86.07  | £0.00            | 19.07569      | 0                         | 4.51183    | £0      |
| 7                  | 55 IGRA+TST | £89.71  | £0.00            | 19.07569      | 0                         | 4.70303    | £0      |
| 8                  | 65 IGRA+TST | £93.36  | £0.00            | 19.07569      | 0                         | 4.89423    | £0      |
| 9                  | 75 IGRA+TST | £97.01  | £0.00            | 19.07569      | 0                         | 5.08543    | £0      |
| 10                 | 85 IGRA+TST | £100.66 | £0.00            | 19.07569      | 0                         | 5.27663    | £0      |
| 11                 | 95 IGRA+TST | £104.30 | £0.00            | 19.07569      | 0                         | 5.46784    | £0      |
| 12                 | 45 IGRA     | £99.75  | £13.68           | 19.07714      | 0.00145                   | 5.22853    | £9,404  |
| 13                 | 55 IGRA     | £110.09 | £20.37           | 19.07714      | 0.00145                   | 5.7707     | £14,006 |
| 14                 | 65 IGRA     | £120.43 | £27.07           | 19.07714      | 0.00145                   | 6.31287    | £18,609 |
| 15                 | 75 IGRA     | £130.77 | £33.77           | 19.07714      | 0.00145                   | 6.85503    | £23,212 |
| 16                 | 85 IGRA     | £141.12 | £40.46           | 19.07714      | 0.00145                   | 7.3972     | £27,815 |
| 17                 | 95 IGRA     | £151.46 | £47.16           | 19.07714      | 0.00145                   | 7.93937    | £32,418 |

18  
19 **TST £36**

| 20 <b>IGRA Cost</b> | Strategy    | Cost    | Incremental Cost | Effectiveness | Incremental Effectiveness | Cost / Eff | ICER    |
|---------------------|-------------|---------|------------------|---------------|---------------------------|------------|---------|
| 21                  | 45 IGRA+TST | £100.15 | £0.41            | 19.07569      | -0.00145                  | 5.25017    | £-278   |
| 22                  | 55 IGRA+TST | £103.80 | £0.00            | 19.07569      | 0                         | 5.44137    | £0      |
| 23                  | 65 IGRA+TST | £107.45 | £0.00            | 19.07569      | 0                         | 5.63257    | £0      |
| 24                  | 75 IGRA+TST | £111.09 | £0.00            | 19.07569      | 0                         | 5.82377    | £0      |
| 25                  | 85 IGRA+TST | £114.74 | £0.00            | 19.07569      | 0                         | 6.01498    | £0      |
| 26                  | 95 IGRA+TST | £118.39 | £0.00            | 19.07569      | 0                         | 6.20618    | £0      |
| 27                  | 45 IGRA     | £99.75  | £0.00            | 19.07714      | 0                         | 5.22853    | £0      |
| 28                  | 55 IGRA     | £110.09 | £6.29            | 19.07714      | 0.00145                   | 5.7707     | £4,324  |
| 29                  | 65 IGRA     | £120.43 | £12.99           | 19.07714      | 0.00145                   | 6.31287    | £8,927  |
| 30                  | 75 IGRA     | £130.77 | £19.68           | 19.07714      | 0.00145                   | 6.85503    | £13,530 |
| 31                  | 85 IGRA     | £141.12 | £26.38           | 19.07714      | 0.00145                   | 7.3972     | £18,133 |
| 32                  | 95 IGRA     | £151.46 | £33.07           | 19.07714      | 0.00145                   | 7.93937    | £22,736 |

33  
34  
35 **TST £48**

| 36 <b>IGRA Cost</b> | Strategy    | Cost    | Incremental Cost | Effectiveness | Incremental Effectiveness | Cost / Eff | ICER    |
|---------------------|-------------|---------|------------------|---------------|---------------------------|------------|---------|
| 37                  | 45 IGRA+TST | £114.23 | £14.49           | 19.07569      | -0.00145                  | 5.98851    | £-9,960 |
| 38                  | 55 IGRA+TST | £117.88 | £7.79            | 19.07569      | -0.00145                  | 6.17971    | £-5,358 |
| 39                  | 65 IGRA+TST | £121.53 | £1.10            | 19.07569      | -0.00145                  | 6.37092    | £-755   |
| 40                  | 75 IGRA+TST | £125.18 | £0.00            | 19.07569      | 0                         | 6.56212    | £0      |
| 41                  | 85 IGRA+TST | £128.82 | £0.00            | 19.07569      | 0                         | 6.75332    | £0      |
| 42                  | 95 IGRA+TST | £132.47 | £0.00            | 19.07569      | 0                         | 6.94452    | £0      |
| 43                  | 45 IGRA     | £99.75  | £0.00            | 19.07714      | 0                         | 5.22853    | £0      |
| 44                  | 55 IGRA     | £110.09 | £0.00            | 19.07714      | 0                         | 5.7707     | £0      |
| 45                  | 65 IGRA     | £120.43 | £0.00            | 19.07714      | 0                         | 6.31287    | £0      |
| 46                  | 75 IGRA     | £130.77 | £5.60            | 19.07714      | 0.00145                   | 6.85503    | £3,848  |
| 47                  | 85 IGRA     | £141.12 | £12.29           | 19.07714      | 0.00145                   | 7.3972     | £8,451  |
| 48                  | 95 IGRA     | £151.46 | £18.99           | 19.07714      | 0.00145                   | 7.93937    | £13,054 |

49  
50  
51  
52  
53  
54  
55  
56  
57  
58  
59  
60

## Health Economic Models Inform Screening for Tuberculosis

## Suppl. Table 5

Market Costs Model  
Sensitivity Analysis

| 5a               |               | Incremental |        | Incremental   |               | Cost / Eff | ICER    |
|------------------|---------------|-------------|--------|---------------|---------------|------------|---------|
| IGRA Specificity | Strategy      | Cost        | Cost   | Effectiveness | Effectiveness |            |         |
| 7                | 0.9 IGRA+TST  | £132.12     | £0.00  | 19.07438      | 0             | 6.92651    | £0      |
| 8                | 0.91 IGRA+TST | £131.48     | £0.00  | 19.07455      | 0             | 6.89304    | £0      |
| 9                | 0.92 IGRA+TST | £130.85     | £0.00  | 19.07471      | 0             | 6.85966    | £0      |
| 10               | 0.93 IGRA+TST | £130.21     | £0.00  | 19.07487      | 0             | 6.8264     | £0      |
| 11               | 0.94 IGRA+TST | £129.58     | £0.00  | 19.07504      | 0             | 6.7933     | £0      |
| 12               | 0.95 IGRA+TST | £128.96     | £0.00  | 19.0752       | 0             | 6.76043    | £0      |
| 13               | 0.96 IGRA+TST | £128.34     | £0.00  | 19.07536      | 0             | 6.72786    | £0      |
| 14               | 0.97 IGRA+TST | £127.73     | £0.00  | 19.07553      | 0             | 6.69576    | £0      |
| 15               | 0.98 IGRA+TST | £127.13     | £0.00  | 19.07569      | 0             | 6.66433    | £0      |
| 16               | 0.99 IGRA+TST | £126.55     | £0.00  | 19.07585      | 0             | 6.63402    | £0      |
| 17               | 0.9 IGRA      | £212.17     | £80.05 | 19.07583      | 0.00144       | 11.12223   | £55,483 |
| 18               | 0.91 IGRA     | £203.90     | £72.42 | 19.07599      | 0.00145       | 10.68868   | £50,065 |
| 19               | 0.92 IGRA     | £195.63     | £64.79 | 19.07616      | 0.00145       | 10.25537   | £44,688 |
| 20               | 0.93 IGRA     | £187.38     | £57.16 | 19.07633      | 0.00145       | 9.82238    | £39,351 |
| 21               | 0.94 IGRA     | £179.12     | £49.54 | 19.07649      | 0.00145       | 9.38982    | £34,050 |
| 22               | 0.95 IGRA     | £170.89     | £41.93 | 19.07666      | 0.00146       | 8.95781    | £28,784 |
| 23               | 0.96 IGRA     | £162.66     | £34.32 | 19.07682      | 0.00146       | 8.5266     | £23,551 |
| 24               | 0.97 IGRA     | £154.46     | £26.73 | 19.07698      | 0.00146       | 8.09655    | £18,348 |
| 25               | 0.98 IGRA     | £146.29     | £19.16 | 19.07714      | 0.00145       | 7.66828    | £13,173 |
| 26               | 0.99 IGRA     | £138.18     | £11.63 | 19.0773       | 0.00145       | 7.24303    | £8,021  |

| 5b              |               | Incremental |        | Incremental   |               | Cost / Eff | ICER    |
|-----------------|---------------|-------------|--------|---------------|---------------|------------|---------|
| TST Specificity | Strategy      | Cost        | Cost   | Effectiveness | Effectiveness |            |         |
| 31              | 0.46 IGRA+TST | £145.44     | £0.00  | 19.07556      | 0             | 7.6242     | £0      |
| 32              | 0.5 IGRA+TST  | £141.77     | £0.00  | 19.07558      | 0             | 7.4322     | £0      |
| 33              | 0.54 IGRA+TST | £138.11     | £0.00  | 19.07561      | 0             | 7.2402     | £0      |
| 34              | 0.58 IGRA+TST | £134.45     | £0.00  | 19.07563      | 0             | 7.04823    | £0      |
| 35              | 0.62 IGRA+TST | £130.79     | £0.00  | 19.07566      | 0             | 6.85627    | £0      |
| 36              | 0.66 IGRA+TST | £127.13     | £0.00  | 19.07569      | 0             | 6.66433    | £0      |
| 37              | 0.7 IGRA+TST  | £123.47     | £0.00  | 19.07571      | 0             | 6.47244    | £0      |
| 38              | 0.74 IGRA+TST | £119.81     | £0.00  | 19.07574      | 0             | 6.28059    | £0      |
| 39              | 0.78 IGRA+TST | £116.15     | £0.00  | 19.07576      | 0             | 6.08882    | £0      |
| 40              | 0.82 IGRA+TST | £112.49     | £0.00  | 19.07579      | 0             | 5.89716    | £0      |
| 41              | 0.86 IGRA+TST | £108.84     | £0.00  | 19.07582      | 0             | 5.70571    | £0      |
| 42              | 0.46 IGRA     | £146.01     | £0.57  | 19.07717      | 0.00161       | 7.65349    | £354    |
| 43              | 0.5 IGRA      | £146.05     | £4.27  | 19.07716      | 0.00158       | 7.65554    | £2,701  |
| 44              | 0.54 IGRA     | £146.09     | £7.98  | 19.07716      | 0.00155       | 7.65794    | £5,144  |
| 45              | 0.58 IGRA     | £146.15     | £11.70 | 19.07715      | 0.00152       | 7.66077    | £7,694  |
| 46              | 0.62 IGRA     | £146.21     | £15.42 | 19.07715      | 0.00149       | 7.66416    | £10,364 |
| 47              | 0.66 IGRA     | £146.29     | £19.16 | 19.07714      | 0.00145       | 7.66828    | £13,173 |
| 48              | 0.7 IGRA      | £146.39     | £22.92 | 19.07713      | 0.00142       | 7.67343    | £16,147 |
| 49              | 0.74 IGRA     | £146.51     | £26.71 | 19.07712      | 0.00138       | 7.68001    | £19,325 |
| 50              | 0.78 IGRA     | £146.68     | £30.53 | 19.0771       | 0.00134       | 7.68874    | £22,773 |
| 51              | 0.82 IGRA     | £146.91     | £34.42 | 19.07708      | 0.00129       | 7.70087    | £26,608 |
| 52              | 0.86 IGRA     | £147.25     | £38.41 | 19.07705      | 0.00124       | 7.71886    | £31,069 |

Health Economic Models Inform Screening for Tuberculosis

5c

| TST Sensitivity | Strategy | Cost    | Incremental Cost | Effectiveness | Incremental Effectiveness | Cost / Eff | ICER    |
|-----------------|----------|---------|------------------|---------------|---------------------------|------------|---------|
| 0.65            | IGRA+TST | £127.84 | £0.00            | 19.07536      | 0                         | 6.70169    | 0       |
| 0.66            | IGRA+TST | £127.70 | £0.00            | 19.07543      | 0                         | 6.69422    | 0       |
| 0.67            | IGRA+TST | £127.55 | £0.00            | 19.07549      | 0                         | 6.68675    | 0       |
| 0.68            | IGRA+TST | £127.41 | £0.00            | 19.07556      | 0                         | 6.67928    | 0       |
| 0.69            | IGRA+TST | £127.27 | £0.00            | 19.07562      | 0                         | 6.6718     | 0       |
| 0.7             | IGRA+TST | £127.13 | £0.00            | 19.07569      | 0                         | 6.66433    | 0       |
| 0.71            | IGRA+TST | £126.98 | £0.00            | 19.07575      | 0                         | 6.65686    | 0       |
| 0.72            | IGRA+TST | £126.84 | £0.00            | 19.07582      | 0                         | 6.64939    | 0       |
| 0.73            | IGRA+TST | £126.70 | £0.00            | 19.07588      | 0                         | 6.64192    | 0       |
| 0.74            | IGRA+TST | £126.56 | £0.00            | 19.07594      | 0                         | 6.63445    | 0       |
| 0.65            | IGRA     | £146.29 | £18.46           | 19.07714      | 0.00178                   | 7.66849    | £10,385 |
| 0.66            | IGRA     | £146.29 | £18.60           | 19.07714      | 0.00171                   | 7.66845    | £10,859 |
| 0.67            | IGRA     | £146.29 | £18.74           | 19.07714      | 0.00165                   | 7.66841    | £11,369 |
| 0.68            | IGRA     | £146.29 | £18.88           | 19.07714      | 0.00158                   | 7.66837    | £11,921 |
| 0.69            | IGRA     | £146.29 | £19.02           | 19.07714      | 0.00152                   | 7.66833    | £12,520 |
| 0.7             | IGRA     | £146.29 | £19.16           | 19.07714      | 0.00145                   | 7.66828    | £13,173 |
| 0.71            | IGRA     | £146.29 | £19.30           | 19.07714      | 0.00139                   | 7.66824    | £13,885 |
| 0.72            | IGRA     | £146.29 | £19.44           | 19.07714      | 0.00133                   | 7.6682     | £14,667 |
| 0.73            | IGRA     | £146.29 | £19.59           | 19.07714      | 0.00126                   | 7.66816    | £15,529 |
| 0.74            | IGRA     | £146.29 | £19.73           | 19.07714      | 0.0012                    | 7.66812    | £16,484 |

Suppl. table 6

| Treatment | Costs    | Cost    | Incremental Cost | Effectiveness | Incremental Effectiveness | Cost / Eff | ICER    |         |    |
|-----------|----------|---------|------------------|---------------|---------------------------|------------|---------|---------|----|
| LTBI      | Strategy | £410    | IGRA+TST         | £113.97       | £0.00                     | 19.07569   | 0       | 5.97446 | £0 |
| £820      | IGRA+TST | £127.16 | £0.00            | 19.07569      | 0                         | 6.66602    | £0      |         |    |
| £1,230    | IGRA+TST | £140.35 | £0.00            | 19.07569      | 0                         | 7.35758    | £0      |         |    |
| £1,640    | IGRA+TST | £153.54 | £0.00            | 19.07569      | 0                         | 8.04914    | £0      |         |    |
| £410      | IGRA     | £125.55 | £11.58           | 19.07714      | 0.00145                   | 6.58118    | £7,963  |         |    |
| £820      | IGRA     | £146.34 | £19.18           | 19.07714      | 0.00145                   | 7.67094    | £13,185 |         |    |
| £1,230    | IGRA     | £167.13 | £26.78           | 19.07714      | 0.00145                   | 8.7607     | £18,408 |         |    |
| £1,640    | IGRA     | £187.92 | £34.38           | 19.07714      | 0.00145                   | 9.85046    | £23,631 |         |    |

| TB     | Strategy | Cost    | Incremental Cost | Effectiveness | Incremental Effectiveness | Cost / Eff | ICER    |
|--------|----------|---------|------------------|---------------|---------------------------|------------|---------|
| £2,454 | IGRA+TST | £120.59 | £0.00            | 19.07569      | 0                         | 6.32187    | £0      |
| £4,908 | IGRA+TST | £127.13 | £0.00            | 19.07569      | 0                         | 6.66433    | £0      |
| £7,362 | IGRA+TST | £133.66 | £0.00            | 19.07569      | 0                         | 7.0068     | £0      |
| £9,816 | IGRA+TST | £140.19 | £0.00            | 19.07569      | 0                         | 7.34926    | £0      |
| £2,454 | IGRA     | £141.49 | £20.89           | 19.07714      | 0.00145                   | 7.41647    | £14,361 |
| £4,908 | IGRA     | £146.29 | £19.16           | 19.07714      | 0.00145                   | 7.66828    | £13,173 |
| £7,362 | IGRA     | £151.09 | £17.43           | 19.07714      | 0.00145                   | 7.9201     | £11,984 |
| £9,816 | IGRA     | £155.90 | £15.70           | 19.07714      | 0.00145                   | 8.17191    | £10,796 |

| Hepatitis | Strategy | Cost    | Incremental Cost | Effectiveness | Incremental Effectiveness | Cost / Eff | ICER    |
|-----------|----------|---------|------------------|---------------|---------------------------|------------|---------|
| £378      | IGRA+TST | £126.81 | £0.00            | 19.07569      | 0                         | 6.64749    | £0      |
| £755      | IGRA+TST | £127.13 | £0.00            | 19.07569      | 0                         | 6.66433    | £0      |
| £1,133    | IGRA+TST | £127.45 | £0.00            | 19.07569      | 0                         | 6.68118    | £0      |
| £1,510    | IGRA+TST | £127.77 | £0.00            | 19.07569      | 0                         | 6.69802    | £0      |
| £378      | IGRA     | £145.97 | £19.16           | 19.07714      | 0.00145                   | 7.65148    | £13,173 |
| £755      | IGRA     | £146.29 | £19.16           | 19.07714      | 0.00145                   | 7.66828    | £13,173 |
| £1,133    | IGRA     | £146.61 | £19.16           | 19.07714      | 0.00145                   | 7.68509    | £13,172 |
| £1,510    | IGRA     | £146.93 | £19.16           | 19.07714      | 0.00145                   | 7.70189    | £13,172 |



## Health Economic Models Inform Screening for Tuberculosis

| Suppl. Table 7 Monte Carlo Probability Sensitivity Analysis |              |           |           |           |           | Average    | Reference No. |
|-------------------------------------------------------------|--------------|-----------|-----------|-----------|-----------|------------|---------------|
| Variable                                                    | Distribution | Minimum   | Peak/Mode | Maximum   | Value     |            |               |
| 1. TB prevalence                                            | Triangular   | 0.0001    | 0.0004    | 0.0010    | 0.0005    | HPA 2010   | 21            |
| 2. LTBI prevalence                                          | Triangular   | 0.010     | 0.035     | 0.100     | 0.0483    | Schablon 2 | 20            |
| 3. TST specificity                                          | Triangular   | 0.46      | 0.66      | 0.86      | 0.66      | Menzies 2C | 15            |
| 4. IGRA specificity                                         | Triangular   | 0.950     | 0.980     | 0.998     | 0.976     |            | 17, 30        |
| 5. IGRA cost                                                | Triangular   | £30.00    | £90.00    | £120.00   | £80.00    | see text   |               |
| 6. TST cost                                                 | Triangular   | £16.00    | £45.00    | £64.00    | £41.67    | see text   |               |
| 7. TB treatment c                                           | Triangular   | £2,454.00 | £4,908.00 | £9,816.00 | £5,726.00 | see text   |               |
| 8. LTBI treatment                                           | Triangular   | £409.50   | £819.00   | £1,638.00 | £955.50   | see text   |               |
| 9. TST sensitivity                                          | Triangular   | 0.65      | 0.71      | 0.74      | 0.70      | Menzies 2C | 15            |
| 10. IGRA sensitivity                                        | Triangular   | 0.86      | 0.9       | 0.93      | 0.897     | Pai 2008   | 5             |
| 11. TST repeat r                                            | Triangular   | 0.07      | 0.175     | 0.35      | 0.215     | see text   |               |
| 12. IGRA repeat                                             | Triangular   | 0.017     | 0.035     | 0.070     | 0.040     | see text   |               |

1  
2  
3  
4  
5  
6  
7 | **Screening of Health Care Workers for Tuberculosis: Development and Validation of a**  
8 **New Health Economic Model to Inform Practice**

Formatted: Left: 0.95", Right: 0.95", Bottom: 0.79"

9  
10  
11  
12  
13  
14 **Merve Nazli Eralp<sup>1</sup>, Stefan Scholtes<sup>1</sup>, Geraldine Martell<sup>2</sup>, Robert Winter<sup>3</sup>, Andrew**  
15 **Robert Exley<sup>4</sup>**

16  
17  
18  
19 <sup>1</sup> **Centre for Health Leadership and Enterprise, Judge Business School, University of**  
20 **Cambridge**

21  
22 <sup>2</sup> **Cambridge Centre for Occupational Health, Cambridge University Hospitals**

23  
24 <sup>3</sup> **Academic Health Science System, Cambridge University Health Partners,**

25  
26 <sup>4</sup> **Department of Pathology, Papworth Hospital NHS Foundation Trust, Cambridge**  
27 **University Health Partners, Cambridge, U.K.**

28  
29  
30  
31 **Correspondence to: Dr Andrew R Exley, Department of Pathology, Papworth Hospital**  
32 **NHS Foundation Trust, Papworth Everard, Cambridge, CB23 3RE.**

33  
34 **Telephone: +44 (0)1480 364117 Fax: +44 (0)1480 364777**

35  
36 **Email: [andrew.exley@papworth.nhs.uk](mailto:andrew.exley@papworth.nhs.uk)**

37  
38  
39  
40 **Key words: Tuberculosis; delivery of health care; cost-benefit analysis;**  
41 **tuberculin test; interferon gamma**

42  
43  
44  
45 | **Word count: [32852916](#)**

46  
47 **Figures: two**

48  
49 **Tables: three**

50  
51 | **Supplemental material: Excel files [x2](#)**

52  
53 **TreeAge Pro file available from corresponding author**  
54  
55  
56  
57  
58  
59  
60

**ABSTRACT**

**Background:** Methods for determining ~~the~~ cost-effectiveness of different treatments are well established, unlike ~~the~~ appraisal of non-drug interventions, including novel diagnostics and biomarkers

**Objective:** We develop and validate a new health economic model by comparing ~~the~~ cost-effectiveness of tuberculin skin test, TST; blood test, IGRA; and TST ~~followed by then~~ IGRA in conditional sequence, in screening health care workers for latent or active TB.

~~We test the impact of key variables to inform health care provision.~~

**Design:** We focus on healthy life years gained as the benefit metric, rather than quality adjusted life years (QALYs) given limited data to estimate quality-adjustments of life years with TB and ~~complications of treatment its complementary diseases, like such as~~ hepatitis. Healthy life years gained refers to the number of TB or ~~complementary~~ hepatitis cases avoided, and the increase in life expectancy. We incorporate disease and test ~~variables parameters~~ informed by systematic meta-analyses and clinical practice. Health and economic outcomes of each strategy are modelled as a decision tree in Markov chains, representing different health states informed by epidemiology. Cost and effectiveness values are generated as the individual is cycled through 20 years of the model. ~~Key parameters undergo one-way and Monte Carlo probabilistic sensitivity analyses.~~

**Setting:** Screening health care workers in secondary and tertiary care.

**Results:** IGRA is the most effective strategy, with ~~an~~ incremental costs per healthy life year gained of ~~£10,614 - £20,6,5929, to £12,532 at base case, £8,021 - and £189,34968, to £5,882 for~~ market costs, TST £45, IGRA £90, ~~with~~ IGRA specificities of ~~99% - 97%; mean (5%, 95%), £12,060 (£4,137 - £38,418) by Monte Carlo analysis—99%.~~

**Conclusions:** Incremental costs per healthy life year gained, a conservative estimate of benefit, are comparable to the £20,000- - £30,000 NICE band for IGRA alone, across wide differences in disease and test ~~variables parameters~~. Health gains justify IGRA costs, even ~~if~~ IGRA tests ~~s~~ costs three times TST ~~costs~~. This health economic model offers a powerful tool for appraising non-drug interventions in the market and under development. (300 words)

Formatted: Font: Not Italic

1  
2  
3  
4  
5  
6  
7  
8  
9  
10  
11  
12 What this paper adds  
13  
14

15  
16 1. What is already known and why this study is required

- 17
- 18 • Methods for determining the cost-effectiveness of different treatments are well  
19 established unlike the appraisal of non-drug interventions including novel diagnostics  
20 and biomarkers  
21
  - 22 • We develop and validate a new health economic model by comparing cost-  
23 effectiveness of tuberculin skin test, TST and / or blood test, IGRA, in screening health  
24 care workers for latent or active TB  
25
  - 26 • We investigate gains in healthy life years, without TB or hepatitis, in a comprehensive  
27 model informed by epidemiology, meta-analyses and clinical practice, testing key  
28 disease and test variables parameters by one-way and Monte Carlo probabilistic  
29 sensitivity analyses  
30  
31  
32  
33  
34  
35

36  
37 2. What this study adds

- 38
- 39 • IGRA is the most effective strategy when screening health care workers for latent or  
40 active TB  
41
  - 42 • Screening with IGRA appears cost effective since incremental costs per healthy life  
43 year gained, a conservative estimate of benefit, are at the lower end of the £20,000 to  
44 £30,000 NICE band  
45
  - 46 • These findings are robust for wide differences in disease and test variables parameters,  
47 even if IGRA test costs are three times TST costs suggesting this health economic  
48 model is a powerful tool for appraising non-drug interventions  
49  
50  
51  
52  
53  
54  
55  
56  
57  
58  
59  
60

## ARTICLE SUMMARY

### Article focus

- Methods for determining cost-effectiveness of different treatments are well established unlike the appraisal of non-drug interventions, including novel diagnostics and biomarkers
- We develop and validate a new health economic model by comparing cost-effectiveness of tuberculin skin test, TST and / or a TB blood test, IGRA, in screening health care workers for latent or active TB
- We investigate gains in healthy life years, without TB or hepatitis, in a comprehensive model informed by epidemiology, meta-analysis and clinical practice, testing ~~key~~ disease and test ~~variables~~ parameters by one-way and Monte Carlo probabilistic sensitivity analyses

### Key messages

- IGRA is the most effective strategy when screening health care workers for latent or active TB
- IGRA screening has an incremental cost per healthy life year gained of £10,614 - £20,929, base case, £8,021 - £18,348, market costs, TST £45, IGRA £90, IGRA specificities 99% -97%; mean (5%, 95%), £12,060 (£4,137 - £38,418) by Monte Carlo analysis £19,968 to £5,882 at standard market costs, TST £45, IGRA £90, for IGRA specificities of 97%—99%, respectively
- 

### Strengths and limitations of this study

- Screening with IGRA alone appears cost effective since incremental costs per healthy life year gained, a conservative estimate of benefit, are at the lower end of the £20,000 to £30,000 NICE band
- Neither TST nor IGRA differentiate latent L-TBI from active TB, and the specificity of IGRA is inferred from studies in populations at low risk of TB

- 1  
2  
3  
4  
5  
6  
7  
8  
9  
10  
11  
12  
13  
14  
15  
16  
17  
18  
19  
20  
21  
22  
23  
24  
25  
26  
27  
28  
29  
30  
31  
32  
33  
34  
35  
36  
37  
38  
39  
40  
41  
42  
43  
44  
45  
46  
47  
48  
49  
50  
51  
52  
53  
54  
55  
56  
57  
58  
59  
60
- These findings are robust for wide differences in disease and test variablesparameters, including IGRA test costs three times TST costs, suggesting this health economic model is a powerful tool for appraising non-drug interventions in the market and under development

Formatted: Indent: Left: 0.25"

Formatted: Bullets and Numbering

## INTRODUCTION

Economic evaluation is a recognised approach to optimising national health care provision within a limited budget but informed choice requires transparent analysis highlighting key assumptions and critical factors<sup>1</sup>. Methods for determining the cost-effectiveness of different treatments are well established<sup>2,3</sup> unlike the appraisal of non-drug interventions, including novel diagnostics and biomarkers. We develop and validate a new health economic model by focusing on whether a tuberculin skin test, TST, and / or a blood test for tuberculosis, IGRA, is more cost-effective in screening health care workers for latent or active tuberculosis, TB. The screening of health care workers for tuberculosis has economic importance given the impact of disease transmission in each case together with the large number of NHS employees at risk, 1.7 million personnel and 80,000 new employees per annum (National Health Service, 2010). We inform the health economic model by applying insight from epidemiology, meta-analysis, and clinical practice including knowledge of market costs to compare the cost-effectiveness of new technology supporting or replacing established practice. The analysis is from the NHS and societal perspective.

Established practice is for trained occupational health staff to administer a TST using cheap readily available reagents injected intradermally at an initial visit. The skin test reaction is measured at a second clinic visit 48 – 72 hours later<sup>4</sup>. The need for two visits is operationally inefficient, and the test itself is limited both by specificity and sensitivity. TST has a low specificity in subjects exposed to BCG vaccination or environmental non-tuberculous mycobacteria (NTM) and moderate sensitivity resulting in false negatives<sup>54,65</sup>. A new technological approach requires a single clinic visit to draw a blood sample which is transferred to the laboratory for analysis in a TB specific interferon-gamma release assay, IGRA<sup>76</sup>. The approach is operationally efficient and the assay has a high specificity and sensitivity, although simple costs per test are greater than the TST. In principle the advantages of old and new might be combined using TST for all and then applying IGRA

Formatted: Indent: Left: 0"

Field Code Changed

Field Code Changed

Field Code Changed

Formatted: Font: Not Italic

Formatted: Do not check spelling or grammar, Superscript

Field Code Changed

Field Code Changed

Field Code Changed

blood testing to TST positive cases to exclude false positive TST after previous exposure to NTM including BCG immunisation. ~~This third approach depends on each test having a similar sensitivity or false negative rate, so the impact of this parameter is subjected to further analysis.~~ Following earlier work,<sup>87</sup> this study has focused on healthy life years gained as the benefit metric, rather than ~~the more common~~ quality adjusted life years. The reason is the lack of robust data to estimate quality-adjustments of life years with TB and complications of treatment~~its complementary diseases~~, such as hepatitis. Health life years gained refers to the number of TB or ~~complementary~~ hepatitis cases avoided, and the associated increase in life expectancy.

Field Code Changed

Formatted: Font: Not Italic

This study adds to the literature<sup>98 87 109 114</sup> in four key areas by incorporating:

Field Code Changed

Field Code Changed

Field Code Changed

Field Code Changed

1. Healthy life years to avoid the assumptions inherent in estimating QALYs
2. Key disease variablesparameters in a comprehensive model of all relevant health states informed by epidemiology including

- i. The impact of LTBI Tuberculosis treatment side effects<sup>124</sup>
- ii. The higher relapse rate of active TB within the first three years of treatment in comparison to the years thereafter<sup>1342</sup>

Field Code Changed

Formatted: Font: Not Italic

Formatted: Font: Not Italic

Field Code Changed

3. Key test variablesparameters relevant to clinical practice including
  - i. The inability of screening tests to differentiate between active and latent TB<sup>65</sup>
  - ii. The sensitivity and specificity of IGRA and TST independently of each other
  - iii. Operational inefficiencies of TST prompting repeat testing<sup>1413</sup>

Field Code Changed

Field Code Changed

4. And we provide a powerful methodology for appraising the cost-effectiveness of non-drug interventions to inform health care policy, including sensitivity analyses of key variablesparameters

## METHODS

The health and economic outcomes of the three alternatives testing strategies are modelled as a decision tree, representing the health outcomes of each of the strategies as Markov



chains over twenty years. The model incorporates economic, medical, epidemiological and operational factors in the analysis. This approach lends itself to the clinical setting where the risks are continuous over time, key events may be repeated, and operational factors may interact with other key ~~variables~~~~parameters~~ to influence the base case result.

### Data collection

The test, population, and outcome characteristics (**table 1**) include data from the meta-analyses by ~~Menzies 2007~~<sup>15</sup> and ~~Pai 2008~~<sup>54</sup>. In the absence of a gold standard for latent tuberculosis infection, LTBI, active TB is used as a surrogate to determine assay sensitivity<sup>15</sup>. Specificity for LTBI is derived by testing populations at low risk of TB<sup>54</sup> ~~16~~<sup>14</sup> ~~17~~<sup>5</sup> to determine the rate of false positives. ~~The analysis is guided by our clinical and market experience with the T-Spot TB test, applying an an IGRA specificity of 98%~~<sup>17</sup> for the base case. We then ~~examine the impact of IGRA specificity in the sensitivity analyses of the cost-effectiveness model.~~ We apply an IGRA specificity of 98%<sup>15</sup> for the base case analysis ~~guided by our clinical and market experience with T-Spot TB, and then examine the impact of IGRA specificity in the sensitivity analyses of the cost-effectiveness model.~~ The operational characteristics of the three alternative approaches include repeat test rates due to test failure and failure to attend for skin test reading. Direct and indirect costs are shown (**table 2**) drawing on data supplied by NICE (~~see appendix 6~~)<sup>18</sup><sup>16</sup>, the Cambridge TB service, and the NHS National tariff 2010<sup>19</sup> ~~with costs adjusted to the 2010-2011 financial year (suppl. table 1).~~ The impact of regional or national differences in disease ~~parameters~~~~variables~~ and costs are examined in ~~one-way~~ sensitivity analyses. ~~The impact of uncertainty within multiple parameters is then examined using Monte Carlo probabilistic sensitivity analysis.~~

### Model construction

We built a decision analysis model, which incorporates the health outcomes as Markov chains over twenty years, to analyze three different diagnostic approaches to LTBI. This model only considers the initial screening for newly hired personnel; the annual testing is beyond the

Formatted: Do not check spelling or grammar, Superscript

Field Code Changed

Formatted: Do not check spelling or grammar, Superscript

Field Code Changed

Field Code Changed

Field Code Changed

Formatted: Font: Not Italic

Formatted: Font: Not Italic

Formatted: Font: Not Italic

Field Code Changed

Formatted: Do not check spelling or grammar, Superscript

Formatted: Font: Not Italic

Formatted: Font: Not Bold

Formatted: Font: Not Italic

scope of this model. The model is coded and composed using the decision analysis software TreeAge Pro Suite 2009, 2011. The states of the Markov chains represent the health conditions of the individuals; following a LTBI diagnosis test and possible interventions. Each Markov state length is one year. The decision is made at the first node of the decision tree between three diagnosis options: TST, IGRA, and a combined sequential testing strategy. The alternatives are assessed according to their cost and effectiveness values over twenty years; in which the costs are direct and indirect monetary costs and their effectiveness is measured by total number of healthy years. The Markov chain is implemented through 20 years, related cost and effectiveness values due to different health states are recorded as the individual is cycled through the model. All future costs are discounted at 5% per year.

**Table 1: Base Case Data for Test, Population and Outcomes Parameters**

| Parameter                                 | Base-case values  | Range Tested     | Reference                           |
|-------------------------------------------|-------------------|------------------|-------------------------------------|
| <b>1. Test characteristics</b>            |                   |                  |                                     |
| Tuberculin skin test (TST)                |                   |                  |                                     |
| Specificity                               | 0.6659            | 0.46 – 0.86      | <sup>415</sup>                      |
| Sensitivity                               | 0.707             | 0.65 – 0.74      | <sup>415</sup>                      |
| Probability a second TST is placed        | 0.1737            | 0.025 – 0.25 *   | <sup>1413</sup>                     |
| Repeat due to operational inefficiency    | 0.324             |                  | Martelli 2010                       |
| TB specific IFNgamma release assay (IGRA) |                   |                  |                                     |
| Specificity                               | 0.98              | 0.90 – 0.99      | <sup>1745</sup>                     |
| Sensitivity                               | 0.90              | 0.82 – 0.98      | <sup>54</sup>                       |
| Probability a second IGRA is required     | 0.0343            | 0.015 – 0.15 *   | <sup>1413</sup>                     |
| Repeat due to operational inefficiency    | 0                 |                  | Martelli 2010                       |
| <b>2. Population characteristics</b>      |                   |                  |                                     |
| Age range                                 | 20 – 30           |                  |                                     |
| Occupation                                | Healthcare worker |                  |                                     |
| BCG vaccination rates                     | 52.8%             |                  | <sup>2047</sup>                     |
| Nationality of majority                   | English           |                  |                                     |
| Prevalence of LTBI                        | 0.035             | 0.035 – 0.35 *   | <sup>2047</sup>                     |
| Prevalence of TB                          | 0.0001            | 0.0001 – 0.001 * | <sup>2148</sup>                     |
| Probability of all causes of death        | 0.0045            | 0.0045 – 0.045 * | Office for National Statistics 2008 |
| <b>3. Probability of Outcomes</b>         |                   |                  |                                     |
| Efficacy of LTBI treatment                | 0.65              |                  | <sup>2249</sup>                     |
| Risk of hepatitis caused by treatment     | 0.0177            | 0.0177 – 0.177 * | <sup>1244</sup>                     |

Formatted Table

Formatted: Do not check spelling or grammar, Superscript

Formatted: Do not check spelling or grammar, Superscript

Field Code Changed

|                                       |        |                         |            |
|---------------------------------------|--------|-------------------------|------------|
| Risk of activation of LTBI            | 0.01   |                         | 65         |
| Probability of relapse of TB          | 0.0315 | <u>0.0315 – 0.315 *</u> | 1342       |
| Probability of death due to TB        | 0.018  | <u>0.018 – 0.18 *</u>   | 2148       |
| Probability of death due to hepatitis | 0      |                         | Assumption |

Field Code Changed

Formatted: Font: 10 pt

Formatted: Font: 10 pt

Field Code Changed

Field Code Changed

Key

\* Ten-fold range tested in sensitivity analyses to highlight potential impact on incremental cost

per healthy life year gained Martell 2010: Martell G, Robinson M-J 2010, Inefficiencies and delays in healthcare worker screening for Mycobacterium tuberculosis – an audit of medical student screening. 3<sup>rd</sup> HPA Pointers (Prevention of Occupational Infections, Treatment and Exposure Reporting Strategies for Healthcare Workers) Conference, London Dec 2010. Sensitivity analyses test the impact of regional or national differences in disease variables.

Table 2: Costs

| Parameter                          | Base-case values                                                                                                                      | Range tested  |
|------------------------------------|---------------------------------------------------------------------------------------------------------------------------------------|---------------|
| <b>4. Cost of Interventions</b>    |                                                                                                                                       |               |
|                                    | <b>NICE <sup>18+6</sup></b>                                                                                                           |               |
| TST                                | £16                                                                                                                                   | £16 - £64     |
| IGRA                               | £44.78                                                                                                                                | £30 - £120    |
| Chest radiograph (CXR)             | £28                                                                                                                                   |               |
|                                    | <b>Cambridge TB Service 2010<br/>NHS National Tariff <sup>19</sup></b>                                                                |               |
| TB Treatment                       | £1,637 <sup>16</sup>                                                                                                                  | 0.5 – 2 times |
| Contact tracing                    | £4263                                                                                                                                 | 0.5 – 2 times |
| LTBI Treatment                     | £647                                                                                                                                  | 0.5 – 2 times |
| Hepatitis Treatment                | £64025                                                                                                                                | 0.5 – 2 times |
| <b>5. Healthcare worker costs</b>  |                                                                                                                                       |               |
|                                    | <b>Cambridge TB Service 2010<br/>NHS Pay 2/2010 <sup>23</sup>, NHS<br/>National Tariff<br/>Midpoint band 6 with on costs<br/>2010</b> |               |
| Time to attend for TB treatment    | £6692                                                                                                                                 | 0.5 – 2 times |
| Time to attend for Contact tracing | £95                                                                                                                                   | 0.5 – 2 times |
| Time to attend for LTBI treatment  | £1762                                                                                                                                 | 0.5 – 2 times |
| Time for Hepatitis treatment       | £11408                                                                                                                                | 0.5 – 2 times |
| <b>6. Discount rate</b>            |                                                                                                                                       |               |
|                                    | 0.05                                                                                                                                  |               |

**Key**

TB treatment costs are derived from the NHS National Tariff 2010-11, <sup>19</sup> applied to the discussions with NICE 2010 and Cambridge TB service. Healthcare worker costs are derived from the NHS Pay Circular (AforC) 2/2010, <sup>23</sup>, point 26 £30,460, plus 22% overheads £37,161 per annum, applied to the Cambridge TB service. Total model costs for TB treatment are TB treatment, plus contact tracing x5 contacts per case <sup>22</sup>, plus health care worker time costs, £4908; for LTBI, LTBI treatment plus health care worker time costs, £819; for Hepatitis, Hepatitis treatment plus health care worker time costs, £755, (suppl. table 1). Sensitivity analyses examine the impact of four fold variation in costs.

**Model construction**

This Markov model assumes

- i. Each health state is taken as a time periods of one year, can not be left earlier and can only last longer if the return probability is greater than zero.

Formatted Table

Field Code Changed

Formatted: Do not check spelling or grammar, Superscript

Formatted: Font: Not Bold

1  
2  
3  
4  
5  
6  
7  
8  
9  
10  
11  
12  
13  
14  
15  
16  
17  
18  
19  
20  
21  
22  
23  
24  
25  
26  
27  
28  
29  
30  
31  
32  
33  
34  
35  
36  
37  
38  
39  
40  
41  
42  
43  
44  
45  
46  
47  
48  
49  
50  
51  
52  
53  
54  
55  
56  
57  
58  
59  
60

- ii. All patients with positive results for LTBI accept treatment, consistent with conditions of employment in the NHS. The impact of limited compliance is allowed for within the efficacy of LTBI treatment.<sup>22</sup>
- iii. Standard Isoniazid and Rifampicin treatment for LTBI lasts three months and all treatments are completed.
- iv. Diagnostic tests are repeated once only as required to achieve a result
- v. The repeat rate for diagnostic tests is further ~~No diagnostic tests are repeated due to operational inefficiencies; this variable is~~ addressed in the sensitivity analysis
- vi. The probability that LTBI generates a positive result is assumed to be the same as the probability that active TB generates a positive result, as there is no gold standard for LTBI ~~The conditional probability of a positive test result in LTBI is the same as for TB~~
- vii. The risk of active TB in cases with false negative results is proportional to the prevalence rates of latent and active TB
- viii. The result of the second test is independent of the first in two stage testing
- ix. The effects of TB and Hepatitis are the simple sum, rather than synergistic
- x. All cases with positive TST or IGRA will have a CXR that identifies all cases of active TB. All positive CXRs are active TB
- xi. The relapse rate of TB is higher than the prevalence rate in the general population for the first three years after recovery.<sup>13+2</sup>
- xii. The probability of continuing to have TB after standard TB treatment is the probability of relapse
- xiii. All TB is diagnosed and treated on time. The effect of late diagnosis of latent or active TB in cases with false negative results is neglected.
- xiv. An equal number of males and females make up new NHS healthcare workers
- xv. Death of an employee has no monetary cost for NHS.
- xvi. Transmission of TB to the community is modeled as a constant monetary cost for contact tracing, including screening the close contacts of the patient, and their treatment in the case of positive Tuberculosis findings.

Formatted: Do not check spelling or grammar, Superscript

Formatted: Font: Not Italic

Formatted: Font: Not Italic

Field Code Changed

xvii. All employees are employed for 20 years

The comprehensive decision tree consists of 985 nodes including three similar sub-trees with different probability and cost parameters (**figure 1**). The initial analysis was then subjected to one-way sensitivity analyses applied to key variablesparameters including IGRA sensitivity and specificity; prevalence rates of TB and LTBI, all causes death rates; test repetition rates; market rates for TST and IGRA tests; and treatment costs for TB, LTBI, and hepatitis. We tested the impact of variation in multiple parameters by first generating triangular distributions using minimum, mode or peak, and maximum values for key parameters.<sup>24</sup> Probabilistic sensitivity analysis was then carried out by Monte Carlo simulation using 100,000 iterations to estimate the total impact of uncertainty on the model, TreeAge Pro 2011.

Formatted: Do not check spelling or grammar, Superscript

**RESULTS**

Base case analysis indicates the incremental cost of IGRA alone is offset by the increased effectiveness of this approach over the two stage sequential approach of TST followed by IGRA for positive TST results (**table 3a**). IGRA is the most effective strategy with an incremental effectiveness of 0.0015 and an incremental cost-effectiveness ratio, ICER, of £19,54515,757 per healthy life year gained. The strategy of TST alone is clearly inferior by all criteria. We therefore focused on further analysis of variablesparameters affecting the relative efficacy of TST + IGRA versus IGRA alone.

Formatted: Font: 11 pt  
 Formatted: Font: 11 pt

**Table 3 Incremental Costs Per Healthy Life Year Gained (ICER) of IGRA or TST**

| Strategy               | Cost    | Incremental Cost | Effectiveness | Incremental Effectiveness | Cost/Effectiveness |
|------------------------|---------|------------------|---------------|---------------------------|--------------------|
| <b>a. Base Case</b>    |         |                  |               |                           |                    |
| IGRA+TST               | £76.60  | £0.00            | 19.07569      | 0.00000                   | 4.02404            |
| IGRA                   | £99.52  | £22.92           | 19.07714      | 0.001455                  | 5.22513            |
| TST                    | £333.42 | £233.90          | 19.07088      | -0.00715                  | 17.48203           |
| <b>b. Market Costs</b> |         |                  |               |                           |                    |
| IGRA+TST               | £127.13 | £0.00            | 19.07574      | 0.00000                   | 6.66686            |

|      |                            |                            |                             |                             |                       |                               |
|------|----------------------------|----------------------------|-----------------------------|-----------------------------|-----------------------|-------------------------------|
| IGRA | <del>£146.29</del> £144.62 | <del>£19.16</del> £13.70   | <del>19.0771</del> 19.07715 | <del>0.001450</del> 0.00106 | <del>7.677.58</del>   | <del>£13.173</del> £12.915    |
| TST  | <del>£367.45</del> £421.15 | <del>£221.16</del> £276.52 | <del>19.0709</del> 19.07000 | <del>-0.0063</del> -0.00715 | <del>19.2722.08</del> | <del>£35.324</del><br>£38.663 |

(Dominated)

Base case, TST £16, IGRA £45; market costs TST £45, IGRA £90.

### Sensitivity analyses of disease and test variables/parameters

Sensitivity analysis of the base case model indicates that the ICER for IGRA ranges from £20,6,5929 to £102,614532 per healthy life year gained for test specificities of 97% - 99% (figure 2a-c, suppl. table 12). Assay sensitivity has a much smaller impact on the ICER (figure 2d).

The superior cost-effectiveness of IGRA was not threatened when base case values were inflated by up to ten fold increases for in all cause death rates; TB death rates; prevalence of LTBI or TB; relapse rates and hepatitis rates (figure 2e, suppl. table 2a3a-f).

TST repeat rates were estimated using the 17.4% rate of failure to achieve a TST result in a UK study of routine practice<sup>14</sup>. This compares with 53% 35/66 of medical students who failed to attend their first Mantoux appointment<sup>25</sup>, and a 12% failure rate to read the 1<sup>st</sup> TST<sup>11</sup>.

Varying the IGRA repeat rate from 1.5% to 15% or TST repeat rate from 2.5% to 25% had little impact on the ICER which increased from £15,5739,346 to £16,86020,744 and £147,242994 to £16,77620,594 per healthy life year gained respectively (suppl. table 2g3g, h).

The cost of TST testing was investigated by eliciting costs from five private medical service providers, was a median of £65 per test, range £45 to £75, and by £48.50 using estimated itemized costings from Cambridge Occupational Health (suppl. table 1.V), total cost £48.53. We used £45 as a market cost for TST and tested the impact of test costs on ICER. Market costs for TST significantly enhance the ICER for IGRA alone across a range of IGRA costs (figure 2f, suppl. table 43a). In particular, the market standard test costs of £45 per TST and

Formatted: Font: (Default) Arial, 11 pt

Formatted: Do not check spelling or grammar, Superscript

Formatted: Font: (Default) Arial, 11 pt

Formatted: Do not check spelling or grammar, Superscript

Formatted: Font: (Default) Arial, 11 pt

Formatted: Font: (Default) Arial, 11 pt

1  
2  
3  
4  
5  
6  
7 | £90 per IGRA generate an ICER of £13,1732,945 per healthy life year gained (table 3b3b). A  
8 threshold value of £30,000 per healthy life year gained is still achieved when IGRA test costs  
9 are three-times TST test costs.  
10

11  
12  
13  
14 | Examining the impact of assay specificity and sensitivity, this market standard model  
15 generates a range of £18,349,968 to £5,8,0821 per healthy life year gained for an IGRA  
16 specificity of 97% - 99%. Sensitivity analysis for TST test characteristics specificity<sup>4</sup> over a  
17 wide range of 0.46 – 0.86 for specificity, and 0.65 – 0.74 for sensitivity<sup>15,73</sup>, suggests IGRA  
18 remains the optimal strategy with costs of £351,455 to £31,069, and £10,385 - £16,484  
19 ~~28,455~~ per healthy life year gained respectively. (suppl. table 53b).  
20  
21  
22  
23

Formatted: Do not check spelling or grammar, Superscript

24  
25  
26 | The calculation and apportionment of treatment costs is likely to vary between centres, but a  
27 four fold variation, 0.5 times – 2 times baseline, in treatment costs for LTBI, TB, or hepatitis is  
28 also accommodated by the market standard model (figure 2g, suppl. table 64).  
29  
30  
31

32  
33 | Probabilistic sensitivity analysis by Monte Carlo simulation was carried out with uncertainty in  
34 each of 12 key parameters defined as triangular distributions (suppl. table 7). Mean  
35 incremental cost per healthy life year gained was £12,060, with 5% and 95% values of £4,137  
36 and £38,418 respectively.  
37  
38  
39  
40  
41  
42  
43  
44  
45  
46  
47  
48  
49  
50  
51  
52  
53  
54  
55  
56  
57  
58  
59  
60

Formatted: Line spacing: Double



1  
2  
3  
4  
5  
6  
7  
8  
9  
10  
11  
12  
13  
14  
15  
16  
17  
18  
19  
20  
21  
22  
23  
24  
25  
26  
27  
28  
29  
30  
31  
32  
33  
34  
35  
36  
37  
38  
39  
40  
41  
42  
43  
44  
45  
46  
47  
48  
49  
50  
51  
52  
53  
54  
55  
56  
57  
58  
59  
60

**DISCUSSION**

The methodology for determining the cost-effectiveness of different treatments is well established <sup>2, 3, 1</sup> in contrast to the analysis of non-drug interventions. Our health economic model suggests a methodology to appraise the host of novel diagnostics <sup>76</sup> and biomarkers generated by clinical science. Healthy life years, despite being a conservative benefit metric, may be particularly useful in evaluating novel screening and monitoring tests by avoiding the assumptions inherent in generating quality adjusted life years <sup>2620, 1, 87, 11+0, 2724</sup>. This approach, allied to the use of multiple disease states supported by epidemiological data, is far more powerful than standard comparisons since the IGRA strategy will overcome a two – three fold excess of simple test costs.

In our study we compare the effectiveness of the diagnostic procedures by focusing on healthy life years gained, <sup>1, 87</sup> rather than quality adjusted life years <sup>2620, 11+0, 1846</sup>. The reason is there are limited data to base estimates of quality adjusted life years for each of the health states applicable to latent or active TB and its treatment <sup>2822</sup>. The additional costs of IGRA alone appear justified by the health gains at £19,5,7457 per healthy life year gained, falling to £13,1732,945 per healthy life year when applying market costs where blood tests cost twice as much as skin tests. Our estimates are conservative in that they only take a healthy life year as a benefit (i.e. years without tuberculosis or hepatitis). Since the calculated ratio is at the lower end of the NICE band of £20,000 - £30,000, IGRA is cost-effective, even at the current NICE threshold which may or may not be conservative <sup>2, 3</sup>. These findings are supported by the probabilistic sensitivity analysis of multiple disease and test parameters. There is no validated instrument for determining quality of life with tuberculosis <sup>2923</sup>, but when such data are available it is likely that additional health gains we would be identified, further improving the cost/benefit ratio.

The health economic model is sensitive to IGRA specificity, which is derived from estimates of false positives in populations at low risk of TB <sup>3024, 2724, 1745</sup>. An IGRA specificity of 98% is

Field Code Changed  
Field Code Changed  
Field Code Changed  
Field Code Changed

Field Code Changed  
Field Code Changed  
Field Code Changed  
Field Code Changed  
Field Code Changed

Field Code Changed  
Field Code Changed  
Field Code Changed  
Field Code Changed  
Field Code Changed

Field Code Changed  
Field Code Changed

Field Code Changed

Field Code Changed  
Field Code Changed  
Field Code Changed

conservative by current literature <sup>3024 2724 1745</sup> but higher than analyses potentially confounded by data from studies in populations at intermediate rather than low risk of TB <sup>54 1644 1846</sup>. Our model accommodates substantial enhancement of TST specificity greater than expected in BCG-vaccinated populations or mixed populations including non-BCG vaccinated health care workers.<sup>15</sup> T, but the outcome may be different in non-BCG vaccinated populations with low NTM infection rates <sup>54</sup> but NTM infection is an increasing problem in adults.<sup>31</sup> Studies testing children prior to BCG immunisation have revealed false positive TST rates of 14% in SE England.<sup>32</sup> and 79% in Norway.<sup>33</sup> It seems likely therefore that previous infection with NTM has a significant role in reducing the specific of TST. The study's findings ~~also~~ accommodate wide regional or national differences in disease ~~variables~~ parameters, although health gains are enhanced by a relative increase in the prevalence of LTBI and hampered by doubling costs for the treatment of LTBI.

Studies including the relative risk of progression to active TB suggest additional limits to TST specificity, reviewed recently.<sup>34</sup> IGRA positive cases with LTBI are more likely to progress to active TB than TST positive cases. In particular, IGRA positive cases showed a 19% greater chance of progression to active TB than expected solely from the increased specificity of IGRA over TST.<sup>10</sup> This advantage would lead to further domination of TST only approaches, by sequential TST then IGRA and IGRA alone strategies.

The one-stop approach of IGRA alone has additional, operational advantages which are likely to enhance the value of this strategy. Testing at a single visit boosts compliance whilst minimising consumption of resources to achieve a test result and the risk of loss to follow up.

The health economic model does not include an allowance for health care workers time to attend for testing, but these staff costs would be ~~are~~ greater when two – three visits are required for TST then IGRA further limiting cost-effectiveness of strategies incorporating TST. Efficiency is enhanced by combining IGRA with other screening blood tests, although a blood sample is more invasive than TST. Blood testing may offer more flexibility than TST with

Field Code Changed  
Field Code Changed  
Field Code Changed  
Field Code Changed  
Field Code Changed

Formatted: Do not check spelling or grammar, Superscript

Field Code Changed

Formatted: Do not check spelling or grammar, Superscript

1  
2  
3  
4  
5  
6  
7  
8  
9  
10  
11  
12  
13  
14  
15  
16  
17  
18  
19  
20  
21  
22  
23  
24  
25  
26  
27  
28  
29  
30  
31  
32  
33  
34  
35  
36  
37  
38  
39  
40  
41  
42  
43  
44  
45  
46  
47  
48  
49  
50  
51  
52  
53  
54  
55  
56  
57  
58  
59  
60

blood sampling facilities widely available in primary care and hospital settings. In contrast, ~~carrying out a TST requires registered nurses with proven competence and recent training or administration of TSTs<sup>4</sup>, which is more expensive than phlebotomy and there is a premium on the skills and training required to accurately place and measure TST which~~ may be limiting during peaks in demand such as in contact tracing. An IGRA strategy transfers costs from the clinic to the laboratory, where cost pressures are intense but responsive to focusing expertise and optimising staffing structures. Critical aspects of blood sampling are defined including the impact of the test population and sampling conditions on the performance characteristics of IGRA<sup>1419 3526 3626 3727</sup>. An IGRA strategy also avoids the possibility of TST boosting TST responses after repeat testing<sup>65</sup> or IGRA responses if follow-up testing is delayed<sup>3626</sup>. The relative merits of different IGRA tests are controversial<sup>2724 1746 54</sup> but where there is a consensus on the assay characteristics this model should allow further investigation.

Our study suggests health gains justify IGRA costs when screening health care workers for latent or active TB. These findings are robust for wide differences in key disease and test ~~variables~~parameters including IGRA test costs three times TST costs, whilst maintaining cost-effectiveness at the lower end of the £20,000 - £30,000 NICE band. We suggest this health economic model incorporating healthy life years gained, epidemiology, meta-analyses and clinical practice provides a powerful tool for assessing the potential impact of new technology on established practice.

Formatted: Font: Not Italic

Formatted: Do not check spelling or grammar, Superscript

Formatted: Font: Not Italic

Field Code Changed

Formatted: English (U.K.)

## Figures

### Figure 1: The Decision Tree

Health and economic outcomes of TST and / or IGRA modeled as a decision tree in Markov chains representing different health states informed by epidemiology: TB, active tuberculosis; LTBI, LTBI1, latent tuberculosis, with treatment; D, Death; S, S1, healthy, with unnecessary treatment for LTBI; H, H+TB, H+LTBI, hepatitis, and TB, or LTBI; T1, T2, T1H, T2H, transition states indicating relapse rates within three years of treatment and thereafter, with hepatitis; A – E, node points repeated as Clone A - Clone E. X, Y are probabilities,  $X = p_{LTBI} / (p_{LTBI} + p_{TB})$ ,  $Y = p_{TB} / (p_{LTBI} + p_{TB})$

### Figure 2:

#### Impact of Wide Differences in Disease and Test VariablesParameters on Cost-Effectiveness

**a – c** IGRA specificity versus **a** overall costs in £ Sterling, **b** cost / effectiveness, **c** ICER, incremental cost per healthy life year gained. **d - f** ICER in the base case model versus **d** IGRA sensitivity, **e** key disease variablesparameters increased times ten, prev prevalence, **f** TST and IGRA costs. **g** ICER in the market case model versus four fold variation in treatment costs.

## Acknowledgements

We thank Mary-Jane Robinson, Nurse Manager, Cambridge Centre for Occupational Health,

for sharing data prior to presentation,<sup>25</sup> who with Geraldine Martell provided data from

“Inefficiencies and delays in healthcare worker screening for Mycobacterium tuberculosis – an

audit of medical student screening”; Edward Mwarangu, National Institute for Health and

Clinical Excellence for discussing costings data during consultation prior to publication of

CG117<sup>18+6</sup>; and Emma Harris, Nurse Specialist, University Hospitals Cambridge TB service,

for help in generating treatment ~~additional~~ costs; and Victoria Stoneman, Research and

Development, Papworth Hospital for critical reading of the manuscriptings data.

**Formatted:** Do not check spelling or grammar, Superscript

**Field Code Changed**

## Funding

This research received no specific grant from any funding agency in the public, commercial or not-for-profit sectors

## Competing Interests

MNE has no competing interests; SS has no competing interests; GM has no competing interests; RW has no competing interests. ARE is the director of the specialist Immunology Laboratory at Papworth Hospital NHS Foundation Trust which provides a supra-regional service for interferon-gamma release assays using the T-Spot TB test (Oxford Immunotech).

## Contributor Statement

ARE & RW conceived the study. SS and MNE developed the economic model with additional clinical data from GM, ARE, RW. MNE, SS, ARE, tested and revised the economic model. All authors contributed to the interpretation of the results and approved the final version of the manuscript.

## Provenance and peer review

Not commissioned; externally peer reviewed

1  
2  
3  
4  
5  
6  
7  
8 **Data sharing statement**  
9

10 The economic model run on TreeAge Pro is available from the corresponding author.  
11  
12  
13  
14  
15  
16  
17  
18  
19  
20  
21  
22  
23  
24  
25  
26  
27  
28  
29  
30  
31  
32  
33  
34  
35  
36  
37  
38  
39  
40  
41  
42  
43  
44  
45  
46  
47  
48  
49  
50  
51  
52  
53  
54  
55  
56  
57  
58  
59  
60

## Reference List

- (1) Trunz BB, Fine P, Dye C. Effect of BCG vaccination on childhood tuberculous meningitis and miliary tuberculosis worldwide: a meta-analysis and assessment of cost-effectiveness. *Lancet* 2006; 367(9517):1173-1180.
- (2) Towse A. Should NICE's threshold range for cost per QALY be raised? Yes. *BMJ* 2009; 338:b181. doi: 10.1136/bmj.b181..b181.
- (3) Raftery J. Should NICE's threshold range for cost per QALY be raised? No. *BMJ* 2009; 338:b185. doi: 10.1136/bmj.b185..b185.
- (4) NHS. Policy for Occupational Health Management of Tuberculosis. *NHS Plus* 2009.
- (5) Pai M, Zwerling A, Menzies D. Systematic Review: T-Cell-Based Assays for the Diagnosis of Latent Tuberculosis Infection: An Update. *Ann Intern Med* 2008; 149(3):177-184.
- (6) Mack U, Migliori GB, Sester M, Rieder HL, Ehlers S, Goletti D et al. LTBI: latent tuberculosis infection or lasting immune responses to M. tuberculosis? A TBNET consensus statement. *Eur Respir J* 2009; 33(5):956-973.
- (7) Lalvani A. Diagnosing Tuberculosis Infection in the 21st Century: New Tools To Tackle an Old Enemy. *Chest* 2007; 131(6):1898-1906.
- (8) Diel R, Wrighton-Smith P, Zellweger JP. Cost-effectiveness of interferon- $\gamma$  release assay testing for the treatment of latent tuberculosis. *Eur Respir J* 2007; 30(2):321-332.
- (9) Diel R, Nienhaus A, Lange C, Schaberg T. Cost-optimisation of screening for latent tuberculosis in close contacts. *Eur Respir J* 2006; 28(1):35-44.
- (10) Diel R, Schaberg T, Loddenkemper R, Welte T, Nienhaus A. Enhanced cost-benefit analysis of strategies for LTBI screening and INH chemoprevention in Germany. *Respiratory Medicine* 2009; 103(12):1838-1853.
- (11) de Perio MA, Tsevat J, Roselle GA, Kralovic SM, Eckman MH. Cost-effectiveness of Interferon Gamma Release Assays vs Tuberculin Skin Tests in Health Care Workers. *Arch Intern Med* 2009; 169(2):179-187.
- (12) Hong Kong Chest Service, Tuberculosis Research Centre M, British Medical Research Council. A double-blind placebo-controlled clinical trial of three antituberculosis chemoprophylaxis regimens in patients with silicosis in Hong Kong. *Am Rev Respir Dis* 1992; 145(1):36-41.
- (13) British Thoracic Society. A controlled trial of 6 months' chemotherapy in pulmonary tuberculosis. Final report: results during the 36 months after the end of chemotherapy and beyond. *Br J Dis Chest* 1984; 78(4):330-336.
- (14) Dosanjh DPS, Hinks TSC, Innes JA, Deeks JJ, Pasvol G, Hackforth S et al. Improved Diagnostic Evaluation of Suspected Tuberculosis in Routine Practice. *Ann Intern Med* 2008; 148(5):325-336.
- (15) Menzies D, Pai M, Comstock G. Meta-analysis: New Tests for the Diagnosis of Latent Tuberculosis Infection: Areas of Uncertainty and Recommendations for Research. *Ann Intern Med* 2007; 146(5):340-354.

Formatted: Space After: 12 pt

Formatted: Font: Italic, Do not check spelling or grammar

Formatted: Font: Italic, Do not check spelling or grammar

Formatted: Font: Italic, Do not check spelling or grammar

Formatted: Do not check spelling or grammar

Formatted: Font: Italic, Do not check spelling or grammar

Formatted: Font: Italic, Do not check spelling or grammar

Formatted: Font: Italic, Do not check spelling or grammar

Formatted: Font: Italic, Do not check spelling or grammar

Formatted: Font: Italic, Do not check spelling or grammar

Formatted: Font: Italic, Do not check spelling or grammar

Formatted: Font: Italic, Do not check spelling or grammar

Formatted: Font: Italic, Do not check spelling or grammar

Formatted: Font: Italic, Do not check spelling or grammar

Formatted: Font: Italic, Do not check spelling or grammar

Formatted: Font: Italic, Do not check spelling or grammar

Formatted: Font: Italic, Do not check spelling or grammar

- (16) Lee K, Han M-K, Choi H-R, Choi C-M, Oh Y-M, Lee S-D et al. Annual Incidence of Latent Tuberculosis Infection among Newly Employed Nurses at a Tertiary Care University Hospital. *Infection Control and Hospital Epidemiology* 2009; 30(12):1218-1222.
- (17) Diel R, Goletti D, Ferrara G, Bothamley G, Cirillo D, Kampmann B et al. Interferon-gamma release assays for the diagnosis of latent M. tuberculosis infection: A systematic review and meta-analysis. *Eur Respir J* 2011; 37(1):88-99.
- (18) National Institute for Health and Clinical Excellence. Clinical diagnosis and management of Tuberculosis, and measures for its prevention and control. *NICE Clinical Guidelines* 2011; CG117:1-64.
- (19) Department of Health. Payment by Results: National Tariff 2010-11. *Guidance* 2010; dh\_115898.xls.
- (20) Schablon A, Beckmann G, Harling M, Diel R, Nienhaus A. Prevalence of latent tuberculosis infection among health care workers in a hospital for pulmonary diseases. *Journal of Occupational Medicine and Toxicology* 2009; 4(1):1.
- (21) Health Protection Agency. Tuberculosis in the U.K. Annual Report on Tuberculosis Surveillance in the U.K. 2009. *HPA Reports* 2010.
- (22) National Collaborating Centre for Chronic Conditions. Tuberculosis: Clinical diagnosis and management of tuberculosis and measures for its prevention and control. *Royal College of Physicians, London* 2006; ISBN 1 86016 227 0.
- (23) NHS. Pay circular (AforC) 2/2010. *The NHS Terms and Conditions of Service Handbook* 2010.
- (24) Fox MP, Lash TL, Greenland S. A method to automate probabilistic sensitivity analyses of misclassified binary variables. *Int J Epidemiol* 2005; 34(6):1370-1376.
- (25) Martell G, Robinson M-J. Inefficiencies and delays in healthcare worker screening for *Mycobacterium tuberculosis* – an audit of medical student screening. *3rd HPA Pointers (Prevention of Occupational Infections, Treatment and Exposure Reporting Strategies for Healthcare Workers) Conference, London* 2010.
- (26) Griebisch I, Coast J, Brown J. Quality-adjusted life-years lack quality in pediatric care: a critical review of published cost-utility studies in child health. *Pediatrics* 2005; 115(5):e600-e614.
- (27) Pooran A, Booth H, Miller RF, Scott G, Badri M, Huggett JF et al. Different screening strategies (single or dual) for the diagnosis of suspected latent tuberculosis: a cost effectiveness analysis. *BMC Pulm Med* 2010; 10:7.
- (28) Miller TL, McNabb SJN, Hilsenrath P, Pasipanodya J, Weis SE. Personal and Societal Health Quality Lost to Tuberculosis. *PLoS ONE* 2009; 4(4):e5080.
- (29) Guo N, Marra F, Marra CA. Measuring health-related quality of life in tuberculosis: a systematic review. *Health Qual Life Outcomes* 2009; 7:14.:14.
- (30) Bienek DR, Chang CK. Evaluation of an interferon-gamma release assay, T-SPOT.TB, in a population with a low prevalence of tuberculosis. *Int J Tuberc Lung Dis* 2009; 13(11):1416-1421.

**Formatted:** Font: Italic, Do not check spelling or grammar

**Formatted:** Font: Italic, Do not check spelling or grammar

**Formatted:** Font: Italic, Do not check spelling or grammar

**Formatted:** Font: Italic, Do not check spelling or grammar

**Formatted:** Font: Italic, Do not check spelling or grammar

**Formatted:** Font: Italic, Do not check spelling or grammar

**Formatted:** Do not check spelling or grammar

**Formatted:** Font: Italic, Do not check spelling or grammar

**Formatted:** Do not check spelling or grammar

**Formatted:** Font: Italic, Do not check spelling or grammar

**Formatted:** Font: Italic, Do not check spelling or grammar

**Formatted:** Font: Italic, Do not check spelling or grammar

**Formatted:** Font: Italic, Do not check spelling or grammar

**Formatted:** Font: Italic, Do not check spelling or grammar

**Formatted:** Font: Italic, Do not check spelling or grammar

**Formatted:** Font: Italic, Do not check spelling or grammar

**Formatted:** Font: Italic, Do not check spelling or grammar



- (31) Fowler SJ, French J, Sreaton NJ, Foweraker J, Condliffe A, Haworth CS et al. Nontuberculous mycobacteria in bronchiectasis: prevalence and patient characteristics. *Eur Respir J* 2006; 28(6):1204-1210.
- (32) Weir RE, Fine PE, Nazareth B, Floyd S, Black GF, King E et al. Interferon-gamma and skin test responses of schoolchildren in southeast England to purified protein derivatives from *Mycobacterium tuberculosis* and other species of mycobacteria. *Clin Exp Immunol* 2003; 134(2):285-294.
- (33) Winje BA, Oftung F, Korsvold GE, Mannsaker T, Ly IN, Harstad I et al. School based screening for tuberculosis infection in Norway: comparison of positive tuberculin skin test with interferon-gamma release assay. *BMC Infect Dis* 2008; 8:140.:140.
- (34) Nienhaus A, Schablon A, Costa JT, Diel R. Systematic review of cost and cost-effectiveness of different TB-screening strategies. *BMC Health Serv Res* 2011; 11:247.:247.
- (35) Ferrara G, Losi M, D'Amico R, Roversi P, Piro R, Meacci M et al. Use in routine clinical practice of two commercial blood tests for diagnosis of infection with *Mycobacterium tuberculosis*: a prospective study. *Lancet* 2006; 367(9519):1328-1334.
- (36) van Zyl-Smit RN, Pai M, Peprah K, Meldau R, Kieck J, Juritz J et al. Within-Subject Variability and Boosting of T-Cell Interferon- $\gamma$  Responses after Tuberculin Skin Testing. *Am J Respir Crit Care Med* 2009; 180(1):49-58.
- (37) Herrera V, Yeh E, Murphy K, Parsonnet J, Banaei N. Immediate incubation reduces indeterminate results for QuantiFERON-TB Gold in-tube assay. *J Clin Microbiol* 2010; 48(8):2672-2676.

#### Reference List

- (1) Trunz BB, Fine P, Dye C. Effect of BCG vaccination on childhood tuberculous meningitis and miliary tuberculosis worldwide: a meta analysis and assessment of cost-effectiveness. *Lancet* 2006; 367(9517):1173-1180.
- (2) Towse A. Should NICE's threshold range for cost per QALY be raised? Yes. *BMJ* 2009; 338:b181. doi: 10.1136/bmj.b181.:b181.
- (3) Raftery J. Should NICE's threshold range for cost per QALY be raised? No. *BMJ* 2009; 338:b185. doi: 10.1136/bmj.b185.:b185.
- (4) Pai M, Zworling A, Menzies D. Systematic Review: T-Cell-Based Assays for the Diagnosis of Latent Tuberculosis Infection: An Update. *Ann Intern Med* 2008; 149(3):177-184.
- (5) Mack U, Migliori GB, Sester M, Rieder HL, Ehlers S, Goletti D et al. LTBI: latent tuberculosis infection or lasting immune responses to *M. tuberculosis*? A TBNET consensus statement. *Eur Respir J* 2009; 33(5):956-973.
- (6) Lalvani A. Diagnosing Tuberculosis Infection in the 21st Century: New Tools To Tackle an Old Enemy. *Chest* 2007; 131(6):1898-1906.
- (7) Diel R, Wrighton-Smith P, Zellweger JP. Cost-effectiveness of interferon- $\gamma$  release assay testing for the treatment of latent tuberculosis. *Eur Respir J* 2007; 30(2):321-332.

**Formatted:** Font: Italic, Do not check spelling or grammar

**Formatted:** Font: Italic, Do not check spelling or grammar

**Formatted:** Font: Italic, Do not check spelling or grammar

**Formatted:** Font: Italic, Do not check spelling or grammar

**Formatted:** Font: Italic, Do not check spelling or grammar

**Formatted:** Font: Italic, Do not check spelling or grammar

**Formatted:** Font: Italic, Do not check spelling or grammar

**Formatted:** Indent: Left: 0", Hanging: 0.5", Line spacing: single, Tab stops: 0.38", Right + 0.5", Left

- 1
- 2
- 3
- 4
- 5
- 6
- 7 —(8) Diel R, Nienhaus A, Lange C, Schaberg T. Cost-optimisation of screening for latent tuberculosis in close contacts. *Eur Respir J* 2006; 28(1):35-44.
- 8
- 9 —(9) Diel R, Schaberg T, Loddenkemper R, Welte T, Nienhaus A. Enhanced cost-benefit analysis of strategies for LTBI screening and INH chemoprevention in Germany. *Respiratory Medicine* 2009; 103(12):1838-1853.
- 10
- 11 —(10) de Perio MA, Tsevat J, Roselle GA, Kralovic SM, Eckman MH. Cost-effectiveness of Interferon Gamma Release Assays vs Tuberculin Skin Tests in Health Care Workers. *Arch Intern Med* 2009; 169(2):179-187.
- 12
- 13 —(11) Hong Kong Chest Service, Tuberculosis Research Centre M, British Medical Research Council. A double-blind placebo-controlled clinical trial of three antituberculosis chemoprophylaxis regimens in patients with silicosis in Hong Kong. *Am Rev Respir Dis* 1992; 145(1):36-41.
- 14
- 15 —(12) British Thoracic Society. A controlled trial of 6 months' chemotherapy in pulmonary tuberculosis. Final report: results during the 36 months after the end of chemotherapy and beyond. *Br J Dis Chest* 1984; 78(4):330-336.
- 16
- 17 —(13) Desanjh DPS, Hinks TSC, Innes JA, Deeks JJ, Pasvol G, Hackforth S et al. Improved Diagnostic Evaluation of Suspected Tuberculosis in Routine Practice. *Ann Intern Med* 2008; 148(5):325-336.
- 18
- 19 —(14) Lee K, Han M-K, Choi H-R, Choi C-M, Oh Y-M, Lee S-D et al. Annual Incidence of Latent Tuberculosis Infection among Newly Employed Nurses at a Tertiary Care University Hospital. *Infection Control and Hospital Epidemiology* 2009; 30(12):1218-1222.
- 20
- 21 —(15) Diel R, Goletti D, Ferrara G, Bothamley G, Cirillo D, Kampmann B et al. Interferon-gamma release assays for the diagnosis of latent M. tuberculosis infection: A systematic review and meta-analysis. *Eur Respir J* 2011; 37(1):88-99.
- 22
- 23 —(16) National Institute for Health and Clinical Excellence. Clinical diagnosis and management of Tuberculosis, and measures for its prevention and control. *NICE Clinical Guidelines* 2011; CG117:1-64.
- 24
- 25 —(17) Schablon A, Beckmann G, Harling M, Diel R, Nienhaus A. Prevalence of latent tuberculosis infection among health care workers in a hospital for pulmonary diseases. *Journal of Occupational Medicine and Toxicology* 2009; 4(1):1.
- 26
- 27 —(18) Health Protection Agency. Tuberculosis in the U.K. Annual Report on Tuberculosis Surveillance in the U.K. 2009. *HPA Reports* 2010.
- 28
- 29 —(19) National Collaborating Centre for Chronic Conditions. Tuberculosis: Clinical diagnosis and management of tuberculosis and measures for its prevention and control. *Royal College of Physicians, London* 2006; ISBN 1 86016 227 0.
- 30
- 31 —(20) Griebisch I, Coast J, Brown J. Quality-adjusted life-years lack quality in pediatric care: a critical review of published cost-utility studies in child health. *Pediatrics* 2005; 115(5):e600-e614.
- 32
- 33 —(21) Pooran A, Booth H, Miller RF, Scott G, Badri M, Huggott JF et al. Different screening strategies (single or dual) for the diagnosis of suspected latent tuberculosis: a cost-effectiveness analysis. *BMC Pulm Med* 2010; 10:7.
- 34
- 35
- 36
- 37
- 38
- 39
- 40
- 41
- 42
- 43
- 44
- 45
- 46
- 47
- 48
- 49
- 50
- 51
- 52
- 53
- 54
- 55
- 56
- 57
- 58
- 59
- 60

1  
2  
3  
4  
5  
6  
7  
8  
9  
10  
11  
12  
13  
14  
15  
16  
17  
18  
19  
20  
21  
22  
23  
24  
25  
26  
27  
28  
29  
30  
31  
32  
33  
34  
35  
36  
37  
38  
39  
40  
41  
42  
43  
44  
45  
46  
47  
48  
49  
50  
51  
52  
53  
54  
55  
56  
57  
58  
59  
60

- ~~-(22) Miller TL, McNabb SJN, Hilsenrath P, Pasipanodya J, Weis SE. Personal and Societal Health Quality Lost to Tuberculosis. *PLoS ONE* 2009; 4(4):e5080.~~
- ~~-(23) Guo N, Marra F, Marra CA. Measuring health-related quality of life in tuberculosis: a systematic review. *Health Qual Life Outcomes* 2009; 7:14.:14.~~
- ~~-(24) Bienek DR, Chang CK. Evaluation of an interferon-gamma release assay, T-SPOT.TB, in a population with a low prevalence of tuberculosis. *Int J Tuberc Lung Dis* 2009; 13(11):1416-1421.~~
- ~~-(25) Ferrara G, Losi M, D'Amico R, Roversi P, Piro R, Meacci M et al. Use in routine clinical practice of two commercial blood tests for diagnosis of infection with *Mycobacterium tuberculosis*: a prospective study. *Lancet* 2006; 367(9519):1328-1334.~~
- ~~-(26) van Zyl-Smit RN, Pai M, Poprah K, Moldau R, Kieck J, Juritz J et al. Within-Subject Variability and Boosting of T-Cell Interferon-gamma Responses after Tuberculin Skin Testing. *Am J Respir Crit Care Med* 2009; 180(1):49-58.~~
- ~~-(27) Herrera V, Yeh E, Murphy K, Parsonnet J, Banaci N. Immediate incubation reduces indeterminate results for QuantiFERON-TB Gold in-tube assay. *J Clin Microbiol* 2010; 48(8):2672-2676.~~
